# Diagnostic tests for Schistosomiasis for low prevalence settings: a systematic review and Meta-Analysis

Michel T Vaillant<sup>1</sup>, Fred Philippy<sup>1</sup>, Jessica Barré<sup>1,2</sup>, Dmitry Bulaev<sup>1</sup>, Amadou T Garba<sup>3</sup>

<sup>1</sup>Competence Center for Methodology and Statistics, Luxembourg Institute of Health

<sup>2</sup>present affiliation: Luxembourg National Office of Health

<sup>3</sup>Schistosomiasis Control Programme, WHO Department of Control of Neglected Tropical Diseases

## Abstract

**Background:** Tests for diagnosing schistosomiasis in areas where prevalence is low due to control programme of the disease should be sufficiently sensitive to detect the residual disease. If they had sufficient diagnostic accuracy they could replace conventional microscopy as they provide a quicker answer and are easier to use.

**Objectives:** To compare sensitivity and specificity of new tests, especially rapid diagnostic tests (RDTs), with regard to a certain reference test.

**Methods :** We searched the electronic databases Pubmed, EMBASE, the Cochrane Library and LILACS up to February 2021. Furthermore we searched results from the previous meta-analyses.

We included studies that used microscopy as the reference standard: for *S. haematobium*, microscopy of urine prepared by filtration, centrifugation, or sedimentation methods; and for *S. mansoni*, microscopy of stool by Kato-Katz thick smear.

Two review authors independently extracted data, assessed quality of the data using QUADAS-2, and performed meta-analysis where appropriate. Grading of evidence was done with the GRADE methodology by using GradePro. Using the variability of test thresholds, we used a bayesian bivariate random-effects summary receiver operating characteristic model for all eligible tests. We investigated heterogeneity, and carried out sensitivity analyses where possible. Results for sensitivity and specificity are presented as percentages with 95% confidence intervals (CI).

**Results:** The review gathered 203 articles stating a diagnostic test for the diagnosis of *S. haematobium* and *S. mansoni* out of which 114 entered the analyses. Microscopy of Urine filtration or Kato-Katz smears were used as the reference standard.

Compared with Kato-Katz smears, AWE-SEA ELISA (Se=94%; Sp=64%) is comparable to CCA1 (Se=87%; Sp=60%). IgG ELISA (Se=93%; Sp=68%) has also a very good ability to detect true positive as well as CAA cassette (Se=73%; Sp=68%). For *S. haematobium*, proteinuria (Se=59%; Sp=83%) and haematuria (Se=74%; Sp=87%) reagent strips showed reasonably high specificities with a considerably better sensitivity for the haematuria test.

There are interesting promising new diagnostic tests that were tested in field studies. However prevalences of the locations where these studies took place are variable and there are no specific study with a high number of patients in areas with low level of schistosomiasis infection.

## Background

Schistosomiasis is an acute and chronic parasitic disease caused by blood flukes (trematode worms) of the genus *Schistosoma*. Transmission occurs when people suffering from schistosomiasis contaminate freshwater sources with their excreta containing parasite eggs. Preventive chemotherapy for schistosomiasis, where people and communities are targeted for large-scale treatment, is required in 52 endemic countries with moderate-to-high transmission. Estimates show that at least 218 million people required preventive treatment worldwide in 2015. The neglected tropical diseases (NTD) road map launched in 2012 followed by the London Declaration of NTD created a new emphasis for the control of schistosomiasis with commitments of various partners to support the fight against schistosomiasis. The NTD road map set as target to reach the 75-100% coverage of school aged children in 2020, and to eliminate the disease in some regions.

Currently there is no guidance available for the evaluation of the interruption of the transmission of schistosomiasis. The current implementation guidelines based mainly on expert opinion need to be revised according to the available scientific evidence.

The goal of the WHO guidelines is to provide evidence based recommendations to countries in their effort to move from control to interruption of transmission. It will help countries on the implementation of preventive chemotherapy for schistosomiasis and on how to verify if the transmission of the disease is interrupted in the country.

Currently, the guideline in use for the morbidity control of schistosomiasis is based on the recommendations by the expert committee in 2002, updated in 2006 to take into account additional strategies, the treatment in low prevalence areas and of special groups at risk and in 2017 for the use of the Circulating Cathodic Antigen (CCA) diagnostic tests.

New updated guidelines are needed, in particular, because new sensitive diagnostic tools have been developed and to guide their utilisation in low transmission areas. The target condition being diagnosed are infections to *Schistosoma mansoni* and *Schistosoma Heamatobium*.

For *S. mansoni*, the reference standard test is the index microscopy test namely the two Kato-Katz smear performed on 2 sample of feces (quadruple KK). However double KK is also found as well as 6KK. It is Urine Microscopy for *S. heamatobium*. The comparators are based on the Hemastix dipstick, CCA, CAA, PCR, serology. All diagnostic tests found in the literature search are in Table 1.

Theoretical sensitivity of some of the diagnostic tests described in Table 1 were investigated (Table 2).

The objectives of the systematic review and meta-analysis were to compare sensitivity and specificity of new tests with regard to the Kato-Katz test.

## Materials and Methods

### Criteria for considering studies for this review

#### *Types of studies*

Use of diagnostic test, validation study, availability of tests performances and/or quantity of patients/data in crossed categories of at least 2 tests

## Participants

Adults and Children (SAC and pre SAC) living in endemic areas that have received elimination interventions

## Target conditions

Schistosomiasis based on infection by *Schistosoma mansoni* or *Schistosoma haematobium*

## Search methods for identification of studies

### Electronic searches

To identify articles relevant to the question, a search in Pubmed, EMBASE, the Cochrane Library and LILACS up to February 2021 will be undergone using analogous search terms. A combination of medical subject headings (MeSH) and title and abstract keywords such as “Schistosomiasis”, “Schistosoma”, “”, or “”, focusing on terms to describe the relevant population: ((schistosomiasis[Title] OR schistosoma[Title]) OR (schistosomiasis[Other Term] OR schistosoma[Other Term])) AND ((diagnostic\*[Title] OR (diagnostic\*[Other Term])).

More precisely, the full electronic database search result can be broken down as follows:

- Search in EMBASE on 10/12/2020
  - MeSH: ('schistosomiasis':ti OR 'schistosoma':ti OR 'schistosomiasis':kw OR 'schistosoma':kw) AND ('diagnostic\*':ti OR 'diagnostic\*':kw)
  - 345 results
- Search in PubMed on 10/12/2020
  - MeSH: (((("schistosomiasis"[Title] OR "schistosoma"[Title]) OR ("schistosomiasis"[Other Term] OR "schistosoma"[Other Term])) AND ("diagnostic\*"[Title] OR "diagnostic\*"[Other Term])) OR ((("schistosomiasis"[Title] OR "schistosoma"[Title] OR ("schistosomiasis"[Other Term] OR "schistosoma"[Other Term])) AND ("specificity"[Title] OR "sensitivity"[Title] OR ("specificity"[Other Term] OR "sensitivity"[Other Term]))))
  - 416 results
- Search in EMBASE on 03/02/2021 for the years 2018-2021
  - MeSH: ('schistosomiasis':ti OR 'schistosoma':ti OR 'schistosomiasis':kw OR 'schistosoma':kw) AND ('diagnostic\*':ti OR 'diagnostic\*':kw) AND (2018:py OR 2019:py OR 2020:py OR 2021:py)
  - 80 results
- Search in PubMed on 03/02/2021 for the years 2018-2021
  - MeSH: (((("schistosomiasis"[Title] OR "schistosoma"[Title]) OR ("schistosomiasis"[Other Term] OR "schistosoma"[Other Term])) AND ("diagnostic\*"[Title] OR "diagnostic\*"[Other Term])) OR ((("schistosomiasis"[Title] OR "schistosoma"[Title] OR ("schistosomiasis"[Other Term] OR "schistosoma"[Other Term])) AND ("specificity"[Title] OR "sensitivity"[Title] OR ("specificity"[Other Term] OR "sensitivity"[Other Term])))) Filters: from 2018 – 2021
  - 95 results
- Search in LILACS on 03/02/2021

- MeSH: ti:(schistosomiasis OR schistosoma) AND (ti:diagnostic\* OR mh:diagnostic\*) AND (db:("LILACS") AND la:("en"))
- 38 results
- Search in Cochrane on 03/02/2021
  - MeSH: (schistosomiasis OR schistosoma) AND diagnostic\*
  - 20 results
- 76 additional references could be found by screening bibliographies of other meta-analyses or by executing specific searches
- 370 database search results from previous study

All in all, the search yielded 1440 results, of which 756 were identified as duplicates.

### **Data collection and analysis**

For each analysis paired forest plots of sensitivity and specificity were created and summary ROC plots were produced:

- Plots of the summary ROC curve,
- Average operating points including 95% confidence intervals and 95% prediction regions
- Bayesian bivariate random effects model used to estimate Sensitivity, specificity.

### **Selection of studies**

We looked for the use of diagnostic tests, validation studies, availability of test performance measurements and/or quantity of patients/data in crossed categories of at least 2 tests.

All search results have been uploaded in the web app Rayyan QRCI (<https://rayyan.qcri.org/welcome>) to perform sorting and selection of articles based on an extended list of keywords by two review authors. After submitting all their inclusion and exclusion decisions on the 674 uploaded references, the results were compared. 203 references were declared eligible for full-text assessment.

Subsequently, data could be extracted from 114 references. The quality of the data has been assessed using QUADAS-2, and meta-analysis was performed where appropriate.

Reasons for the exclusion of studies can be found in Appendix B.

### **Data extraction and management**

We included studies that provide participant data. Only studies in which true-positives (TPs), true-negatives (TNs), false-positives (FPs), and false-negatives (FNs) were reported or could be extracted from the data were included.

Other data were extracted such as:

- Study authors, publication year, and journal
- Study design.
- Study participants' age and sex.

- Prevalence of schistosomiasis.
- Treatment status of participants with praziquantel before study
- Reference standard (microscopy), including number of samples per individual
- Index tests

### ***Assessment of methodological quality***

This review is based on the QUADAS-2 guidelines for the review of diagnostic accuracy. It collects estimates from the scientific literature and aggregate them to provide meta-analytic estimates

#### Assessment of methodological quality table:

The assessment of the recommended 11 QUADAS items was performed.

Associated characteristics of the studies, as well as the 11 QUADAS items for every included study can be found in Appendix B.

### ***Grading of the evidence***

The GRADE methodology was used to rate the evidence concerning each diagnostic tool. The GradePro GDT tool (<https://gradepro.org/>) helped in gathering information and rating. Summary of Findings (SoF) tables will be created for every test comparison to evaluate quality of evidence (or certainty) of evidence and strength of recommendations. These tables can be found in Appendix C.

### ***Statistical analysis and data synthesis***

Intervention:

Diagnostic tests: Urine Microscopy, Hemastix dipstick, CCA, CAA, PCR, serology tests, reagent strips

Comparison:

Comparison of various tests found in the literature

Outcomes:

- Performances of the tests (sensitivity, specificity, PPV, NPV)
- Disease prevalence with the reference test and with the index test

Using the variability of test thresholds, we used a bayesian bivariate random-effects summary receiver operating characteristic model for all eligible tests.

In order to improve the summary measures considering the group reference test, the Kato-Katz thick smears (single, duplicate, triplicate, etc.) were lumped together based on known differences in sensitivity. This work was carried out for CCA1, CCA2. For FLOTAC we also considered lumping FLOTAC fresh, FLOTAC (10 days) and FLOTAC (30 days). This has been added in the respective tools paragraphs.

### ***Investigations of heterogeneity***

We investigated heterogeneity by examining the forest plots, and carried out sensitivity analyses where possible.

### ***Assessment of reporting bias***

We did not assess reporting bias.

## PICO question

In people living in schistosomiasis endemic settings (s. mansoni and s. haematobium), do newer diagnostics when compared to conventional standard (KK for s. mansoni and urine microscopy for s. haem) have better sensitivity and specificity?

## Results

### Results of the search

Together with the records yielded during the first attempt of this study, our search yielded 1364 records. Out of the 1364 records, 608 records were suitable for the review after duplicates were removed. Abstracts were reviewed and 127 articles were eligible for full-text assessment. 76 additional records were identified through reading of the references tables of these articles, which results in a total of 203 records eligible for full-text assessment.

Out of these 203 records, 89 were excluded for the following reasons:

- Article in Chinese (n=5)
- Article in Portuguese (n=1)
- Use of a combined gold standard (n=17)
- Empirical data not available (n=5)
- Ongoing study (n=1)
- No indication regarding the reference test (n=2)
- Meta-analysis (n=3)
- Wrong type of study (n=40)
- Statistical analysis (n=5)
- Paper retracted (n=1)
- Article was not retrieved (n=9)

The PRISMA flow diagram can be found in Appendix A (Figure 1).

### Methodological quality of included studies

Using the Quadas-2 tool we evaluated the risk of bias in the quality appraisal of the included studies. We evaluated an unclear risk of bias of about 12.30% in patient selection and 6.56% in the use of the index test. Concerning the reference standard the risk of bias was 29.50%. In terms of applicability concerns, only patient selection would show a 2.46% unclear evaluation.

Figures 2 and 3 provide a visual illustration of the evaluation of risk of bias and applicability concerns.

## Findings

### ***Prevalence of schistosomiasis***

The raw prevalences detected in the different studies that were included in the review are shown in Table 3.

### ***Number of studies and participants***

The number of studies and the number of participants for each study are given in Table 6.

### ***Forest plots and Summary ROC curves***

For every test comparison, the forest plot as well as the SROC curve can be found in Figures 4 – 59.

### ***Publication Bias & Heterogeneity***

For every test comparison, included in at least 4 studies, Publication Bias and Heterogeneity has been assessed by multiple methods.

In order to evaluate publication bias, funnel plots were created by plotting, for every test comparison, log-transformed Diagnostic Odds Ratio against its Standard Error. Additionally, given that standard funnel plots are less appropriate for DTA meta-analyses, Deeks' funnel plot and asymmetry test have been used.

Heterogeneity was studied by using the  $I^2$  statistic and by performing Cochran's Q tests on the Diagnostic Odds Ratio (DOR) as well as separately on sensitivity and specificity.

Results of both analyses (for test comparisons included in at least 4 studies) can be found in Appendix D.

## **CCA1**

### **CCA1 cassette versus single Kato-Katz smear**

1 study with a total of 217 individuals was found for this comparison. Prevalence was 5.35%.

### **CCA1 cassette versus duplicate Kato-Katz smears**

14 studies totalling 17 comparisons with a total of 4884 individuals were found for this comparison. Prevalence ranged from 6% to 91%. The forest plot show heterogeneity which is also observed in the HSROC curve.

Meta analytic sensitivity and specificity of data were 85.47% and 59.09% respectively.

### **CCA1 cassette versus quadruplicate Kato-Katz smears**

10 studies totalling 11 comparisons with a total of 4592 individuals were found for this comparison. Prevalence ranged from 6.37% to 60%. The forest plot show heterogeneity which is also observed in the HSROC curve.

Meta analytic sensitivity and specificity of data were 87.05% and 58.63% respectively.



### **CCA1 cassette versus sextuplicate Kato-Katz smears**

7 studies with a total of 2325 individuals were found for this comparison. Prevalence ranged from 5.73% to 94.74%. The forest plot show heterogeneity which is also observed in the HSROC curve.

Meta analytic sensitivity and specificity of data were 83.48% and 67.86% respectively.

### **CCA1 cassette versus 16 Kato-Katz smears**

1 study with a total of 217 individuals was found for this comparison. Prevalence was 14.29%.

### **CCA1 cassette versus single, duplicate, quadruplicate, sextuplicate and 16 Kato-Katz smears**

There were 25 studies totalling 37 comparisons against single, duplicate, quadruplicate, sextuplicate or 16 Kato-Katz smears in 12,235 individuals. The prevalence ranged from 5.73% to 91%. The forest plot shows heterogeneity which is also observed in the HSROC curve.

Meta analytic sensitivity and specificity of data were 87.22% and 60.14% respectively.

### **CCA1 cassette versus Urine Microscopy**

There were 4 studies with a total of 991 individuals. The prevalence ranged from 18.11% to 57.60%. The forest plot show heterogeneity which is also observed in the HSROC curve.

Meta analytic sensitivity and specificity of data were 51.43% and 74.13% respectively.

### **CCA1 cassette versus Helmintex**

1 study with a total of 214 individuals was found for this comparison. Prevalence was 24.77%.

### **CCA1 cassette versus RT-PCR**

1 study with a total of 196 individuals was found for this comparison. Prevalence was 55.10%.

## **CCA2**

### **CCA2 cassette versus duplicate Kato-Katz smears**

1 study with a total of 100 individuals was found for this comparison. Prevalence was 8%.

### **CCA2 cassette versus quadruplicate Kato-Katz smears**

1 study with a total of 100 individuals was found for this comparison. Prevalence was 11%.

### **CCA2 cassette versus duplicate and quadruplicate Kato-Katz smears**

There was 1 study totalling 2 comparisons against duplicate and quadruplicate Kato-Katz smears in 200 individuals. Prevalence ranged from 8% to 11%. The forest plots show heterogeneity which is also observed in the HSROC curve.

Meta analytic sensitivity and specificity of data were 51.75% and 87.59% respectively.



## **CAA**

### **CAA cassette versus duplicate Kato-Katz smears**

There were 2 studies totalling 3 comparisons against duplicate Kato-Katz smears in 830 individuals. Prevalence ranged from 28.43% to 91%. The forest plots show heterogeneity which is also observed in the HSROC curve.

Meta analytic sensitivity and specificity of data were 60.70% and 66.63% respectively.

### **CAA cassette versus quadruplicate Kato-Katz smears**

1 study with a total of 377 individuals was found for this comparison. Prevalence was 6.37%.

### **CAA cassette versus duplicate and quadruplicate Kato-Katz smears**

There were 3 studies totalling 4 comparisons against duplicate or quadruplicate Kato-Katz smears in 1207 individuals. Prevalence ranged from 6.37% to 91%. The forest plots show heterogeneity which is also observed in the HSROC curve.

Meta analytic sensitivity and specificity of data were 72.65% and 68.07% respectively.

### **CAA cassette vs Urine Microscopy**

There were 4 studies with a total of 1247 individuals. Prevalence ranged from 18.11% to 57.60%. The forest plots show heterogeneity which is also observed in the HSROC curve.

Meta-analytic sensitivity and specificity of data were 70.93% and 78.57% respectively.

## **FLOTAC**

### **FLOTAC (fresh) versus triplicate Kato-Katz smears**

1 studies with a total of 112 individuals was found for this comparison. Prevalence was 64.29%.

### **FLOTAC (10 days) versus triplicate Kato-Katz smears**

1 studies with a total of 112 individuals was found for this comparison. Prevalence was 64.29%.

### **FLOTAC (30 days) versus triplicate Kato-Katz smears**

1 studies with a total of 112 individuals was found for this comparison. Prevalence was 64.29%.

### **FLOTAC (all) versus triplicate Kato-Katz smears**

1 study with 3 different comparisons totaling 336 individuals was found for this comparison. Prevalence was 64.29%.

The forest plot show heterogeneity which is also observed in the HSROC curve.

Meta analytic sensitivity and specificity of data were 79.37% and 64.71% respectively.

## ***SmCTF-RDT***

### **SmCTF-RDT versus quadruplicate Kato-Katz smears**

3 studies totalling 4 comparisons with a total of 291 individuals was found for this comparison. Prevalence ranged from 20.34% to 60%.

The forest plot show heterogeneity which is also observed in the HSROC curve.

Meta analytic sensitivity and specificity of data were 85.60% and 35.48% respectively.

### **SmCTF-RDT versus Urine Microscopy**

1 study with a total of 117 individuals was found for this comparison. Prevalence was 5.13%.

## ***Sm DNA PCR***

### **Sm DNA PCR versus duplicate Kato-Katz smears**

1 study with a total of 89 individuals was found for this comparison. Prevalence was 50.56%.

## ***ELISA***

### **SWAP ELISA versus sextuplicate Kato-Katz smears**

1 study with a total of 482 individuals was found for this comparison. Prevalence was 38.80%.

### **IgM ELISA versus triplicate Kato-Katz smears**

1 study with a total of 137 individuals was found for this comparison. Prevalence was 36.50%.

### **IgG ELISA versus triplicate Kato-Katz smears**

4 studies with a total of 954 individuals were found for this comparison. Prevalence ranged from 36.50% to 93.64%.

The forest plot shows heterogeneity which is also observed in the HSROC curve.

Meta analytic sensitivity and specificity of data were 93.02% and 68.43% respectively.

## ***Anti IgG RDT-Sh***

### **Anti IgG RDT-Sh versus Urine Microscopy**

1 study with a total of 160 individuals was found for this comparison. Prevalence was 51.25%.

## ***Proteinuria (Reagent strip)***

### **Proteinuria (Reagent strip) versus Urine microscopy**

40 studies with 41 different test comparisons totalling 79,466 individuals were found for this comparison. Prevalence ranged from 4% to 88.57%.

The forest plots show heterogeneity which is also observed in the HSROC curve.

Meta analytic sensitivity and specificity of data were 58.66% and 82.56% respectively.

## ***Haematuria (Reagent strip)***

### **Haematuria (Reagent strip) versus Urine microscopy**

71 studies with 72 different test comparisons totalling 156,279 individuals were found for this comparison. Prevalence ranged from 3.23% to 86.93%.

The forest plot show heterogeneity which is also observed in the HSROC curve.

Meta analytic sensitivity and specificity of data were 74.38% and 86.78% respectively.

## ***AWE-SEA ELISA***

### **AWE-SEA ELISA versus quadruplicate Kato-Katz smears**

2 studies with a total of 484 individuals were found for this comparison. Prevalence ranged from 6.37% to 21.50%. The forest plot did not show great heterogeneity as well as the HSROC curve. Meta analytic sensitivity and specificity of data were 93.74% and 64.17% respectively.

## ***LAMP***

### **LAMP versus triplicate Kato-Katz smears**

2 studies with a total of 493 individuals was found for this comparison. Prevalence ranged from 45.95% to 100%.

Meta-analytic sensitivity and specificity of data were 94.29% and 98.23% respectively.

### **LAMP versus Urine Microscopy**

2 studies with a total of 266 individuals was found for this comparison. Prevalence ranged from 26.60% to 50.58%.

Meta-analytic sensitivity and specificity of data were 77.06% and 63.50% respectively.

## ***IHA***

### **IHA versus triplicate Kato-Katz smears**

1 study with a total of 2 comparisons and 203 individuals was found for this comparison. Prevalence ranged from 95.45% to 100%. The forest plot did not show great heterogeneity as well as the HSROC curve.

Meta analytic sensitivity and specificity of data were 81.48% and 7.15% respectively.

### **IHA versus Urine Microscopy**

1 studies with a total of 145 individuals was found for this comparison. Prevalence was 60.96%. The forest plot did not show great heterogeneity as well as the HSROC curve.

## ***Colorimetric test***

### **Colorimetric test versus Urine Microscopy**

1 study with a total of 1279 individuals was found for this comparison. Prevalence was 61.85%.

## ***rSP13 ELISA***

### **rSP13 ELISA versus 27 Kato-Katz smears**

1 study with a total of 1371 individuals was found for this comparison. Prevalence was 5.40%.

## ***IgG SEA-ELISA***

### **IgG SEA-ELISA vs CCA1 cassette**

1 study with a total of 258 individuals was found for this comparison. Prevalence was 56.98%.

### **IgG SEA-ELISA vs Urine Microscopy**

4 studies with a total of 503 individuals were found for this comparison. Prevalence ranged from 30.67% to 78%. The forest plot did not show great heterogeneity as well as the HSROC curve.

Meta analytic sensitivity and specificity of data were 88.94% and 71.29% respectively.

## ***Leukocyturia (reagent strip)***

### **Leukocyturia (reagent strip) vs Urine Microscopy**

5 studies with a total of 1532 individuals were found for this comparison. Prevalence ranged from 4% to 76.78%. The forest plot did not show great heterogeneity as well as the HSROC curve.

Meta analytic sensitivity and specificity of data were 55.70% and 59.95% respectively.

## ***COPT***

### **COPT vs duplicate Kato-Katz smears**

1 study with a total of 572 individuals was found for this comparison. Prevalence was 0.87%.

## ***PCR***

### **PCR vs Kato-Katz smears**

2 studies with a total of 3 comparisons and 551 individuals were found for this comparison. Prevalence ranged from 12.88% to 85.19%.

Meta analytic sensitivity and specificity of data were 95.79% and 46.92% respectively.

### **PCR vs CCA1 cassette**

1 study with a total of 258 individuals was found for this comparison. Prevalence was 56.98%.

## ***Helmintex***

### **Helmintex vs duplicate KK**

1 study with a total of 461 individuals was found for this comparison. Prevalence was 11.93%.

### **Helmintex vs RT-PCR**

1 study with a total of 176 individuals was found for this comparison. Prevalence was 59.09%.

## ***DDIA***

### **DDIA vs Urine Microscopy**

1 study with a total of 146 individuals was found for this comparison. Prevalence was 60.96%.

## ***RT-PCR***

### **RT-PCR vs duplicate KK**

1 study with a total of 206 individuals was found for this comparison. Prevalence was 19.90%.

### **RT-PCR vs sextuple KK**

1 study with a total of 198 individuals was found for this comparison. Prevalence was 32.32%.

## **Analyses with the bayesian bivariate random-effects HSROC model**

The Bayesian bivariate random effects hierarchical summary ROC model allowed to identify the sensitivity and specificity for each comparisons previously made. It gave for each of them the meta-analytic estimates of sensitivity and specificity. The results are shown in Table 4 (raw outputs of the model) and Table 5 (cf. Appendix A) with the evaluation of sensitivity and specificity with their 95% Bayesian Credible Intervals.

Results are not valid when the number of studies is 1. In that case the result in the forest plot is to be considered.

## Discussion

### Summary of main results

The review gathered 203 articles stating a diagnostic test for the diagnosis of *S. haematobium* and *S. mansoni* out of which 114 entered the analyses. Microscopy of Urine Microscopy or Kato-Katz smears were used as reference standards.

There was a great heterogeneity in the reference standards used over the studies. For *S. mansoni*, duplicate to sextuplicate Kato-Katz smears and even 16 or 27 smears were used. For *S. haematobium* Urine Microscopy could be simple or double.

However concerning *S. mansoni* CCA1 (Se=87%; Sp=60%) seems to show higher superiority in sensitivity and specificity (estimated by the bayesian bivariate model) than CCA2 (Se=52%; Sp=88%) as compared with Kato-Katz smears.

SmCTF-RDT (Se=86%; Sp=36%) has a similar sensitivity but a much lower specificity.

IgG ELISA (Se=93%; Sp=68%) is comparable to CCA1 but there is only 4 studies in this comparison.

AWE-SEA ELISA (Se=94%; Sp=64%) has also a very ability to detect true positive but with only two studies in the comparison.

Based on 4 studies of 1207 individuals CAA cassette was comparable (Se=73%; Sp=68%) to FLOTAC (Se=79%; Sp=65%).

SWAP ELISA evaluated in 1 study of 482 individual showed a sensitivity of 92% and specificity of 57%.

For *S. haematobium* proteinuria (Se=59%; Sp=83%) and haematuria (Se=74%; Sp=87%) reagent strips showed reasonably high specificities with a considerable better sensitivity for the haematuria test.

The colorimetric test gave interesting results despite low sensitivity (Se=52%; Sp=75%)

The new tests would have better feasibility (i.e. commercialized and available) and should be the other argument for choosing them on top of this analysis. Other laboratory tests (e.g. various ELISAs) that are not ready for public health application are less important in the short term.

### Limitations

- Imperfect standard tests
- Few number of studies and sparse analyses for some test comparisons
- Limited sample size and prevalence not accounted for in the analyses

- While higher eggs means higher sensitivity and population prevalence, there is a relation between sensitivity/specificity and prevalence. This relation was not accounted for in the analysis due the limited sample size

## Evidence to Recommendation:

### Certainty of the evidence of

- **accuracy:** moderate for CCA, SmCTF-RDT, Proteinuria, Haematuria
- **Values:** Probably no important uncertainty or variability. Prevalences as evaluated by the reference test (Kato-Katz smear or urine microscopy) were always underestimated when compared to the index tests. In general it was below 50% but a few studies showed a prevalence higher than 50%. Only one study in Nigeria (Ugbomoiko 2009) showed lower prevalences with the index test (proteinuria and haematuria against urine microscopy).
- **Balance of effects:** Probably favors the intervention
- **Resources required:** depends on the tests' prices, no evidence. Concerning *S. mansoni* PCO test such as CCA1, CCA2, CAA, SmCTF-RDT would be less resource intensive than IgG ELISA, AWE-SEA ELISA, SWAP ELISA which need a local lab or to be sent to a central lab. For *S. haematobium* proteinuria and haematuria reagent strips can be used on site while the haematuria test cannot. The colorimetric test is also possible in the field.
- **Equity:** Probably increased. The use of a diagnostic test will not provide more equity in itself. A diagnostic test that best detect schistosomiasis pathogen may allow mass deworming toward elimination. However as Helminthiasis occurs in poor communities, concurrent interventions oriented against degraded and unhealthy living conditions as well as gender equity to break the cycle of chronic poverty and schistosomiasis infections
- **Acceptability:** Yes. The acceptability of diagnostic test may mostly depends on the cost to be scaled up
- **Feasibility:** Yes if RDT
- **Benefits and harms:**

Potential benefits: Concerning *S. mansoni* CCA1 (Se=88%; Sp=59%) seems to show higher superiority in sensitivity and specificity (estimated by the bayesian bivariate model) than CCA2 (Se=52%; Sp=88%) as compared with Kato-Katz smears. SmCTF-RDT (Se=86%; Sp=36%) has a similar sensitivity but a much lower specificity. IgG ELISA (Se=90%; Sp=76%) is comparable to CCA1 but there is only 4 studies in this comparison. AWE-SEA ELISA (Se=94%; Sp=64%) has also a very ability to detect true positive but with only two studies in the comparison. Based on 4 studies of 1207 individuals CAA cassette was comparable (Se=73%; Sp=68%) to FLOTAC (Se=79%; Sp=65%).

SWAP ELISA evaluated in 1 study of 482 individual showed a sensitivity of 92% and specificity of 57%.



For *S. haematobium* proteinuria (Se=58%; Sp=82%) and haematuria (Se=74%; Sp=86%) reagent strips showed reasonably high specificities with a considerable better sensitivity for the haematuria test. The colorimetric test gave interesting results despite low sensitivity (Se=52%; Sp=75%).

Potential harms: No potential harm

**Type of Recommendation:** Conditional recommendation for CCA. Conventional diagnostic tool in humans of Kato-Katz and CCA for *S. mansoni* and urine microscopy for *S. haematobium* have reasonable sensitivity and excellent specificity. Conventional diagnostic tool in humans are well accepted, low-cost, and feasible given their widespread implementation. New diagnostic tools, such as molecular-based and immunologic diagnostics, lack sufficient data on sensitivity and specificity, and their utility is further limited by challenges with feasibility and resource implications.

## References to studies

### Included studies

#### ***Abdel-Wahab 1992***

Abdel-Wahab, M. F.Esmat, G.Ramzy, I.Fouad, R.Abel-Rahman, M.Yosery, A.Narooz, S.Strickland, G. T.. Schistosoma haematobium infection in Egyptian schoolchildren: demonstration of both hepatic and urinary tract morbidity by ultrasonography. Transactions of the Royal Society of Tropical Medicine and Hygiene 1992;86(4):406-409.

#### ***Abdel-Wahab 2000***

Abdel-Wahab, M. F.Esmat, G.Ramzy, I.Narooz, S.Medhat, E.Ibrahim, M.El-Boraey, Y.Strickland, G. T.. The epidemiology of schistosomiasis in Egypt: Fayoum Governorate. Am J Trop Med Hyg 2000;62(2 Suppl):55-64.

#### ***Adriko 2014***

Adriko, M.Standley, C. J.Tinkitina, B.Tukahebwa, E. M.Fenwick, A.Fleming, F. M.Sousa-Figueiredo, J. C.Stothard, J. R.Kabatereine, N. B.. Evaluation of circulating cathodic antigen (CCA) urine-cassette assay as a survey tool for Schistosoma mansoni in different transmission settings within Bugiri District, Uganda. Acta Trop 2014/04/15;136:50-7.

#### ***Al-Shehri 2018***

Al-Shehri, H.Koukounari, A.Stanton, M. C.Adriko, M.Arinitwe, M.Atuhaire, A.Kabatereine, N. B.Stothard, J. R.. Surveillance of intestinal schistosomiasis during control: A comparison of four diagnostic tests across five Ugandan primary schools in the Lake Albert region. Parasitology 2018;145(13):1715-1722.

#### ***Al-Sherbiny 1999***

Al-Sherbiny, M. M.Osman, A. M.Hancock, K.Deelder, A. M.Tsang, V. C.. Application of immunodiagnostic assays: detection of antibodies and circulating antigens in human schistosomiasis and correlation with clinical findings. Am J Trop Med Hyg 1999;60(6):960-6.

#### ***Anosike 2001***

Anosike, J. C.Nwoke, B. E.Njoku, A. J.. The validity of haematuria in the community diagnosis of urinary schistosomiasis infections. J Helminthol 2001;75(3):223-5.

#### ***Anyan 2020***

Anyan, W. K.Pulkkila, B. R.Dyra, C. E.Price, M.Naples, J. M.Quartey, J. K.Anang, A. K.Lodh, N.. Assessment of dual schistosome infection prevalence from urine in an endemic community of Ghana by molecular diagnostic approach. Parasite Epidemiology and Control 2020.

#### ***Aryeetey 2000***

Aryeetey, M. E.Wagatsuma, Y.Yeboah, G.Asante, M.Mensah, G.Nkrumah, F. K.Kojima, S.. Urinary schistosomiasis in southern Ghana: 1. Prevalence and morbidity assessment in three (defined) rural areas drained by the Densu river. Parasitol Int 2000;49(2):155-63.

### **Assaré 2018**

Assaré, R. K.Tra, M. B. I.Ouattara, M.Hürlimann, E.Coulibaly, J. T.N'Goran, E. K.Utzinger, J.. Sensitivity of the Point-of-Care Circulating Cathodic Antigen Urine Cassette Test for Diagnosis of Schistosoma mansoni in Low-Endemicity Settings in Côte d'Ivoire. Am J Trop Med Hyg 2018;99(6):1567-1572.

### **Ayele 2008**

Ayele, B.Erko, B.Legesse, M.Hailu, A.Medhin, G.. Evaluation of circulating cathodic antigen (CCA) strip for diagnosis of urinary schistosomiasis in Hassoba school children, Afar, Ethiopia. Parasite 2008;15(1):69-75.

### **Barakat 1983**

Barakat, R. M.El-Gassim, E. E.Awadalla, H. N.El-Molla, A.Omer, E. A.. Evaluation of enzyme linked immunosorbent assay (ELISA) as a diagnostic tool for schistosomiasis. Trans R Soc Trop Med Hyg 1983;77(1):109-11.

### **Bassiouny 2014**

Bassiouny, H. K.Hasab, A. A.El-Nimr, N. A.Al-Shibani, L. A.Al-Waleedi, A. A.. Rapid diagnosis of schistosomiasis in Yemen using a simple questionnaire and urine reagent strips. East Mediterr Health J 2014;20(4).

### **Bezerra 2020**

Bezerra, D. F.Pinheiro, M. C. C.Barbosa, L.Viana, A. G.Fujiwara, R. T.Bezerra, F. S. M.. Diagnostic comparison of stool exam and point-of-care circulating cathodic antigen (POC-CCA) test for schistosomiasis mansoni diagnosis in a high endemicity area in northeastern Brazil. Parasitology.

### **Birrie 1995 (HPA)**

Birrie, H.Medhin, G.Jemaneh, L.. Comparison of urine filtration and a chemical reagent strip in the diagnosis of urinary schistosomiasis in Ethiopia. East Afr Med J 1995;72(3):180-5.

### **Birrie 1995 (LPA)**

Birrie, H.Medhin, G.Jemaneh, L.. Comparison of urine filtration and a chemical reagent strip in the diagnosis of urinary schistosomiasis in Ethiopia. East Afr Med J 1995;72(3):180-5.

### **Birrie 1995 (MPA)**

Birrie, H.Medhin, G.Jemaneh, L.. Comparison of urine filtration and a chemical reagent strip in the diagnosis of urinary schistosomiasis in Ethiopia. East Afr Med J 1995;72(3):180-5.

### **Bocanegra 2015**

Bocanegra, C. Gallego, S. Mendioroz, J. Moreno, M. Sulleiro, E. Salvador, F. Sikaleta, N. Nindia, A. Tchipita, D. Joromba, M. Kavaya, S. Sanchez Montalva, A. Lopez, T. Molina, I.. Epidemiology of Schistosomiasis and Usefulness of Indirect Diagnostic Tests in School-Age Children in Cubal, Central Angola. PLoS Negl Trop Dis 2015/10/17;9(10):e0004055.

### **Bogoch 2012**

Bogoch,, IIAndrews, J. R.Dadzie Ephraim, R. K.Utzinger, J.. Simple questionnaire and urine reagent strips compared to microscopy for the diagnosis of Schistosoma haematobium in a community in northern Ghana. Trop Med Int Health 2012/08/07;17(10):1217-21.

### ***Bosompem 1996***

Bosompem, K. M.Ayi, I.Anyan, W. K.Nkrumah, F. K.Kojima, S.. Limited field evaluation of a rapid monoclonal antibody-based dipstick assay for urinary schistosomiasis. *Hybridoma* 1996;15(6):443-7.

### ***Bosompem 2004***

Bosompem, K. M.Owusu, O.Okanla, E. O.Kojima, S.. Applicability of a monoclonal antibody-based dipstick in diagnosis of urinary schistosomiasis in the Central Region of Ghana. *Trop Med Int Health* 2004;9(9):991-6.

### ***Bouilhac 1981***

Bouilhac, M.Le Bras, J.Payet, M.Savel, J.Coulaud, J. P.. [Comparative sensitivity of I. F. A. T. using adult *Schistosoma* antigen and E. L. I. S. A. with ovular antigen in the immunodiagnosis of schistosomiasis (author's transl)]. *Bull Soc Pathol Exot Filiales* 1981;74(6):668-75.

### ***Chernet 2017***

Chernet, A. Kling, K. Sydow, V. Kuenzli, E. Hatz, C. Utzinger, J. van Lieshout, L. Marti, H. Nickel, B. Labhardt, N. D. Neumayr, A.. Accuracy of Diagnostic Tests for *Schistosoma mansoni* Infection in Asymptomatic Eritrean Refugees: Serology and Point-of-Care Circulating Cathodic Antigen Against Stool Microscopy. *Clin Infect Dis* 2017/04/22;65(4):567-574.

### ***Colley 2013 cameroon***

Colley, D. G. Binder, S. Campbell, C. King, C. H. Tchuem Tchuente, L. A. N'Goran, E. K. Erko, B. Karanja, D. M. Kabatereine, N. B. van Lieshout, L. Rathbun, S.. A five-country evaluation of a point-of-care circulating cathodic antigen urine assay for the prevalence of *Schistosoma mansoni*. *Am J Trop Med Hyg* 2013/01/23;88(3):426-32.

### ***Colley 2013 Côte d'ivoire***

Colley, D. G. Binder, S. Campbell, C. King, C. H. Tchuem Tchuente, L. A. N'Goran, E. K. Erko, B. Karanja, D. M. Kabatereine, N. B. van Lieshout, L. Rathbun, S.. A five-country evaluation of a point-of-care circulating cathodic antigen urine assay for the prevalence of *Schistosoma mansoni*. *Am J Trop Med Hyg* 2013/01/23;88(3):426-32.

### ***Cooppan 1987***

Cooppan, R. M.Schutte, C. H.Dingle, C. E.van Deventer, J. M.Becker, P. J.. Urinalysis reagent strips in the screening of children for urinary schistosomiasis in the RSA. *S Afr Med J* 1987;72(7):459-62.

### ***Coulibaly 2013***

Coulibaly, J. T. N'Goran, E. K. Utzinger, J. Doenhoff, M. J. Dawson, E. M.. A new rapid diagnostic test for detection of anti-*Schistosoma mansoni* and anti-*Schistosoma haematobium* antibodies. *Parasit Vectors* 2013/01/31;6:29.

### ***Coulibaly 2016***

Coulibaly, J. T.Ouattara, M.Becker, S. L.Lo, N. C.Keiser, J.N'Goran, E. K.Ianniello, D.Rinaldi, L.Cringoli, G.Utzinger, J.. Comparison of sensitivity and faecal egg counts of Mini-FLOTAC using fixed stool samples and Kato-Katz technique for the diagnosis of *Schistosoma mansoni* and soil-transmitted helminths. *Acta Trop* 2016/10/30;164:107-116.

### **Dawson 2013**

Dawson, E. M. Sousa-Figueiredo, J. C. Kabatereine, N. B. Doenhoff, M. J. Stothard, J. R.. Intestinal schistosomiasis in pre school-aged children of Lake Albert, Uganda: diagnostic accuracy of a rapid test for detection of anti-schistosome antibodies. Trans R Soc Trop Med Hyg 2013/08/27;107(10):639-47.

### **De Clercq 1995**

De Clercq, D.Sacko, M.Vercruysse, J.Diarra, A.Landouré, A.vanden Bussche, V.Gryseels, B.Deelder, A.. Comparison of the circulating anodic antigen detection assay and urine filtration to diagnose Schistosoma haematobium infections in Mali. Trans R Soc Trop Med Hyg 1995;89(4):395-7.

### **De Oliveira 2005**

Oliveira, E. J.Kanamura, H. Y.Lima, D. M.. Efficacy of an enzyme-linked immunosorbent assay as a diagnostic tool for schistosomiasis mansoni in individuals with low worm burden. Mem Inst Oswaldo Cruz 2005/08/23;100(4):421-5.

### **Elbasheir 2020**

Elbasheir, M. M.Karti, I. A.Elamin, E. M.. Evaluation of a rapid diagnostic test for schistosoma mansoni infection based on the detection of circulating cathodic antigen in urine in central Sudan. PLoS Neglected Tropical Diseases 2020.

### **El-Morshedy 1996**

El-Morshedy, H.Kinosien, B.Barakat, R.Omer, E.Khamis, N.Deelder, A. M.Phillips, M.. Circulating anodic antigen for detection of Schistosoma mansoni infection in Egyptian patients. Am J Trop Med Hyg 1996;54(2):149-53.

### **El-Sayed 1995**

El-Sayed, H. F.Rizkalla, N. H.Mehanna, S.Abaza, S. M.Winch, P. J.. Prevalence and epidemiology of Schistosoma mansoni and S. haematobium infection in two areas of Egypt recently reclaimed from the desert. Am J Trop Med Hyg 1995;52(2):194-8.

### **Eltiro 1992**

Eltiro, F.Ye-ebiyo, Y.Taylor, M. G.. Evaluation of an enzyme linked immunosorbent assay (ELISA) using Schistosoma mansoni soluble egg antigen as a diagnostic tool for Schistosoma mansoni infection in Ethiopian schoolchildren. J Trop Med Hyg 1992;95(1):52-6.

### **Eltoum 1992**

Eltoum, I. A.Sulaiman, S.Ismail, B. M.Ali, M. M.Elfatih, M.Homeida, M. M.. Evaluation of haematuria as an indirect screening test for schistosomiasis haematobium: a population-based study in the White Nile province, Sudan. Acta Trop 1992;51(2):151-7.

### **Espirito-Santo 2015**

Espirito-Santo, Mcc. Alvarado-Mora, Mv. Pinto, Pls. Sanchez, Mca. Dias-Neto, E. Castilho, Vlp. Goncalves, Emdn. Chieffi, Pp. Luna, Ejda. Pinho, Jrr. Carrilho, Fj. Gryschek, Rcb.. Comparative Study of the Accuracy of Different Techniques for the Laboratory Diagnosis of Schistosomiasis Mansoni in Areas of Low Endemicity in Barra Mansa City, Rio de Janeiro State, Brazil. Biomed research international 2015;2015.

### ***Fatiregun 2005***

Fatiregun, AkinolaOsungbade, KayodeOlumide, E. A.. Diagnostic performance of screening methods for urinary schistosomiasis in a school-based control programme, in Ibadan, Nigeria. *Journal of Community Medicine and Primary Health Care* 2005;17(1).

### ***Ferreira 2017***

Ferreira, Ft. Fidelis, Ta. Pereira, Ta. Otoni, A. Queiroz, Lc. Amancio, Ff. Antunes, Cm. Lambertucci, Jr.. Sensitivity and specificity of the circulating cathodic antigen rapid urine test in the diagnosis of schistosomiasis mansoni infection and evaluation of morbidity in a low-endemic area in Brazil. *Revista da sociedade brasileira de medicina tropical* 2017;50(3):358-364.

### ***French 2007***

French, M. D.Rollinson, D.Basáñez, M. G.Mgeni, A. F.Khamis, I. S.Stothard, J. R.. School-based control of urinary schistosomiasis on Zanzibar, Tanzania: monitoring micro-haematuria with reagent strips as a rapid urological assessment. *J Pediatr Urol* 2007;3(5):364-8.

### ***Fuss 2018***

Fuss, A.Mazigo, H. D.Tappe, D.Kasang, C.Mueller, A.. Comparison of sensitivity and specificity of three diagnostic tests to detect *Schistosoma mansoni* infections in school children in Mwanza region, Tanzania. *PLoS ONE* 2018;13(8).

### ***Gabr 2000***

Gabr, N. S.Hammad, T. A.Orieby, A.Shawky, E.Khattab, M. A.Strickland, G. T.. The epidemiology of schistosomiasis in Egypt: Minya Governorate. *Am J Trop Med Hyg* 2000;62(2 Suppl):65-72.

### ***Gandasegui 2015***

Gandasegui, J. Fernandez-Soto, P. Carranza-Rodriguez, C. Perez-Arellano, J. L. Vicente, B. Lopez-Aban, J. Muro, A.. The Rapid-Heat LAMP Pellet Method: A Potential Diagnostic Method for Human Urogenital Schistosomiasis. *PLoS Negl Trop Dis* 2015/08/01;9(7):e0003963.

### ***Gandasegui 2018***

Gandasegui, J.Fernández-Soto, P.Dacal, E.Rodríguez, E.Saugar, J. M.Yepes, E.Aznar-Ruiz-de-Alegría, M. L.Espasa, M.Ninda, A.Bocanegra, C.Salvador, F.Sulleiro, E.Moreno, M.Vicente, B.López-Abán, J.Muro, A.. Field and laboratory comparative evaluation of a LAMP assay for the diagnosis of urogenital schistosomiasis in Cubal, Central Angola. *Tropical Medicine and International Health* 2018;23(9).

### ***Glinz 2010***

Glinz, D.Silue, K. D.Knopp, S.Lohourignon, L. K.Yao, K. P.Steinmann, P.Rinaldi, L.Cringoli, G.N'Goran, E. K.Utzinger, J.. Comparing diagnostic accuracy of Kato-Katz, Koga agar plate, ether-concentration, and FLOTAC for *Schistosoma mansoni* and soil-transmitted helminths. *PLoS Negl Trop Dis* 2010/07/24;4(7):e754.

### ***Gundersen 1996***

Gundersen, S. G.Kjetland, E. F.Poggensee, G.Helling-Giese, G.Richter, J.Chitsulo, L.Koumwenda, N.Krantz, I.Feldmeier, H.. Urine reagent strips for diagnosis of schistosomiasis haematobium in women of fertile age. *Acta Trop* 1996;62(4):281-7.

### ***Hammad 1997***

Hammad, T. A.Gabr, N. S.Talaat, M. M.Orieby, A.Shawky, E.Strickland, G. T.. Hematuria and proteinuria as predictors of Schistosoma haematobium infection. Am J Trop Med Hyg 1997;57(3).

### ***Hammam 2000a***

Hammam, H. M.Zarzour, A. H.Moftah, F. M.Abdel-Aty, M. A.Hany, A. H.El-Kady, A. Y.Nasr, A. M.Abd-El-Samie, A.Qayed, M. H.Mikhail, N. N.Talaat, M.Hussein, M. H.. The epidemiology of schistosomiasis in Egypt: Qena governorate. Am J Trop Med Hyg 2000;62(2 Suppl):80-7.

### ***Hammam 2000b***

Hammam, H. M.Allam, F. A.Moftah, F. M.Abdel-Aty, M. A.Hany, A. H.Abd-El-Motagaly, K. F.Nafeh, M. A.Khalifa, R.Mikhail, N. N.Talaat, M.Hussein, M. H.Strickland, G. T.. The epidemiology of schistosomiasis in Egypt: Assiut governorate. Am J Trop Med Hyg 2000;62(2 Suppl):73-9.

### ***Kassim 1989***

Kassim, O. O.. Proteinuria and haematuria as predictors of schistosomiasis in children. Ann Trop Paediatr 1989;9(3):156-60.

### ***Kiliku 1991***

Kiliku, F. M.Kimura, E.Muhoho, N.Migwi, D. K.Katsumata, T.. The usefulness of urinalysis reagent strips in selecting Schistosoma haematobium egg positives before and after treatment with praziquantel. J Trop Med Hyg 1991;94(6):401-6.

### ***King 1988a***

King, C. H.Lombardi, G.Lombardi, C.Greenblatt, R.Hodder, S.Kinyanjui, H.Ouma, J.Odiambo, O.Bryan, P. J.Muruka, J.et al., Chemotherapy-based control of schistosomiasis haematobia. I. Metrifonate versus praziquantel in control of intensity and prevalence of infection. Am J Trop Med Hyg 1988;39(3):295-305.

### ***King 1988b***

King, C. H.Keating, C. E.Muruka, J. F.Ouma, J. H.Houser, H.Siongok, T. K.Mahmoud, A. A.. Urinary tract morbidity in schistosomiasis haematobia: associations with age and intensity of infection in an endemic area of Coast Province, Kenya. Am J Trop Med Hyg 1988;39(4):361-8.

### ***Kitange 1993***

Kitange, H. M.Swai, A. B.McLarty, D. G.Alberti, K. G.. Schistosomiasis prevalence after administration of praziquantel to school children in Melela village, Morogoro region, Tanzania. East Afr Med J 1993;70(12):782-6.

### ***Knopp 2015***

Knopp, S.Corstjens, P. L.Koukounari, A.Cercamondi, C. I.Ame, S. M.Ali, S. M.de Dood, C. J.Mohammed, K. A.Utzinger, J.Rollinson, D.van Dam, G. J.. Sensitivity and Specificity of a Urine Circulating Anodic Antigen Test for the Diagnosis of Schistosoma haematobium in Low Endemic Settings. PLoS Negl Trop Dis 2015;9(5).

### ***Knopp 2018***

Knopp, S.Ame, SM.Hattendorf, J.Ali, SM.Khamis, IS.Bakar, F.Khamis, MA.Person, B.Kabole, F.Rollinson, D.. Urogenital schistosomiasis elimination in Zanzibar: accuracy of urine filtration and haematuria reagent



strips for diagnosing light intensity *Schistosoma haematobium* infections. *Parasites & vectors* 2018;11(1):552.

### ***Kosinski 2011***

Kosinski, K. C.Bosompem, K. M.Stadecker, M. J.Wagner, A. D.Plummer, J.Durant, J. L.Gute, D. M.. Diagnostic accuracy of urine filtration and dipstick tests for *Schistosoma haematobium* infection in a lightly infected population of Ghanaian schoolchildren. *Acta Trop* 2011/03/01;118(2):123-7.

### ***Lamberton 2014***

Lamberton, P. H.Kabatereine, N. B.Oguttu, D. W.Fenwick, A.Webster, J. P.. Sensitivity and specificity of multiple Kato-Katz thick smears and a circulating cathodic antigen test for *Schistosoma mansoni* diagnosis pre- and post-repeated-praziquantel treatment. *PLoS Negl Trop Dis* 2014;8(9).

### ***Legesse 2008***

Legesse, M.Erko, B.. Field-based evaluation of a reagent strip test for diagnosis of schistosomiasis mansoni by detecting circulating cathodic antigen (CCA) in urine in low endemic area in Ethiopia. *Parasite* 2008;15(2):151-5.

### ***Lengeler 1993***

Lengeler, C.Mshinda, H.Morona, D.deSavigny, D.. Urinary schistosomiasis: testing with urine filtration and reagent sticks for haematuria provides a comparable prevalence estimate. *Acta Trop* 1993;53(1):39-50.

### ***Lindholz 2018***

Lindholz, C. G.Favero, V.Verissimo, C. D. M.Candido, R. R. F.de Souza, R. P.dos Santos, R. R.Morassutti, A. L.Bittencourt, H. R.Jones, M. K.St. Pierre, T. G.Graeff-Teixeira, C.. Study of diagnostic accuracy of Helminx, Kato-Katz, and POC-CCA methods for diagnosing intestinal schistosomiasis in Candeal, a low intensity transmission area in northeastern Brazil. *PLoS Neglected Tropical Diseases* 2018;12(3).

### ***Lodh 2013***

Lodh, N.Mwansa, J. C.Mutengo, M. M.Shiff, C. J.. Diagnosis of *Schistosoma mansoni* without the stool: comparison of three diagnostic tests to detect *Schistosoma* [corrected] mansoni infection from filtered urine in Zambia. *Am J Trop Med Hyg* 2013/05/30;89(1):46-50.

### ***Mafe 1997***

Mafe, M. A.. The diagnostic potential of three indirect tests for urinary schistosomiasis in Nigeria. *Acta Trop* 1998/03/11;68(3):277-84.

### ***Mafe 2000***

Mafe, M. A.von Stamm, T.Utzinger, J.N'Goran, E. K.. Control of urinary schistosomiasis: an investigation into the effective use of questionnaires to identify high-risk communities and individuals in Niger State, Nigeria. *Trop Med Int Health* 2000;5(1):53-63.

### ***Magalhaes 2020***

Magalhães, F.D.C.Resende, S.D.Senra, C.Graeff-Teixeira, C.Enk, M.J.Coelho, P.M.Z.Oliveira, E.Negrão-Corrêa, D.A.Geiger, S.M.Carneiro, M.. Accuracy of real-time polymerase chain reaction to detect *Schistosoma mansoni* - Infected individuals from an endemic area with low parasite loads. *Parasitology* 2020;147(10):1140-1148.

### ***Magnussen 2001***

Magnussen, P.Ndawi, B.Sheshe, A. K.Byskov, J.Mbwana, K.Christensen, N. O.. The impact of a school health programme on the prevalence and morbidity of urinary schistosomiasis in Mwera Division, Pangani District, Tanzania. Trans R Soc Trop Med Hyg 2001;95(1):58-64.

### ***Mazigo 2018***

Mazigo, H. D.Kepha, S.Kinung'hi, S. M.. Sensitivity and specificity of point-of-care circulating Cathodic antigen test before and after praziquantel treatment in diagnosing Schistosoma mansoni infection in adult population co-infected with human immunodeficiency virus-1, North-Western Tanzania. Arch Public Health 2018;76:29.

### ***Midzi 2009***

Midzi, N. Butterworth, Ae. Mduluz, T. Munyati, S. Deelder, Am. Dam, Gj.. Use of circulating cathodic antigen strips for the diagnosis of urinary schistosomiasis. Transactions of the royal society of tropical medicine and hygiene 2009;103(1):45-51.

### ***Morenikeji 2014***

Morenikeji, O.Quazim, J.Omoregie, C.Hassan, A.Nwuba, R.Anumudu, C.Adejuwon, S.Salawu, O.Jegede, A.Odaibo, A.. A cross-sectional study on urogenital schistosomiasis in children; haematuria and proteinuria as diagnostic indicators in an endemic rural area of Nigeria. Afr Health Sci 2014;14(2):390-6.

### ***Mott 1985 Ghana***

Mott, K. E.Dixon, H.Osei-Tutu, E.England, E. C.Ekue, K.Tekle, A.. Indirect screening for Schistosoma haematobium infection: a comparative study in Ghana and Zambia. Bull World Health Organ 1985;63(1):135-42.

### ***Mott 1985 Zambia***

Mott, K. E.Dixon, H.Osei-Tutu, E.England, E. C.Ekue, K.Tekle, A.. Indirect screening for Schistosoma haematobium infection: a comparative study in Ghana and Zambia. Bull World Health Organ 1985;63(1):135-42.

### ***Mtasiwa 1996***

Mtasiwa, D.Mayombana, C.Kilima, P.Tanner, M.. Validation of reagent sticks in diagnosing urinary schistosomiasis in an urban setting. East Afr Med J 1996;73(3):198-200.

### ***Murare 1987***

Murare, H. M.Taylor, P.. Haematuria and proteinuria during Schistosoma haematobium infection: relationship to intensity of infection and the value of chemical reagent strips for pre- and post-treatment diagnosis. Trans R Soc Trop Med Hyg 1987;81(3):426-30.

### ***Mwangi 2018***

Mwangi, I. N.Agola, E. L.Mugambi, R. M.Shiraho, E. A.Mkoji, G. M.. Development and Evaluation of a Loop-Mediated Isothermal Amplification Assay for Diagnosis of Schistosoma mansoni Infection in Faecal Samples. J Parasitol Res 2018.

### ***N'Goran 1989***

N'Goran, K. E.Yapi Yapi, Y.Rey, J. L.Soro, B.Coulibaly, A.Bellec, C.. [Screening for urinary schistosoma by strips reactive to hematuria. Evaluation in zones of intermediate and weak endemicity in the Ivory Coast]. Bull Soc Pathol Exot Filiales 1989;82(2):236-42.

### ***Nausch 2014***

Nausch, N.Dawson, E. M.Midzi, N.Mduluza, T.Mutapi, F.Doenhoff, M. J.. Field evaluation of a new antibody-based diagnostic for *Schistosoma haematobium* and *S. mansoni* at the point-of-care in northeast Zimbabwe. BMC Infect Dis 2014/03/29;14:165.

### ***Navaratnam 2012***

Navaratnam, A. M. D.Mutumba-Nakalembe, M. J.Stothard, J. R.Kabatereine, N. B.Fenwick, A.Sousa-Figueiredo, J. C.. Notes on the use of urine-CCA dipsticks for detection of intestinal schistosomiasis in preschool children. Transactions of the Royal Society of Tropical Medicine and Hygiene 2012;106(10):619-622.

### ***Ndamukong 2001***

Ndamukong, K. J.Ayuk, M. A.Dinga, J. S.Akenji, T. N.Ndiforchu, V. A.Titanji, V. P.. Prevalence and intensity of urinary schistosomiasis in primary school children of the Kotto Barombi Health Area, Cameroon. East Afr Med J 2001;78(6):287-9.

### ***Ndhlovu 1996***

Ndhlovu, P.Cadman, H.Gundersen, S.Vennervald, B. J.Friis, H.Christensen, N. O.Mutasa, G.Kaondera, K.Mandaza, G.Deelder, A. M.. Circulating anodic antigen (CAA) levels in different age groups in a Zimbabwean rural community endemic for *Schistosoma haematobium* determined using the magnetic beads antigen-capture enzyme-linked immunoassay. Am J Trop Med Hyg 1996;54(5):537-42.

### ***Nduka 1995***

Nduka, F. O.Ajaero, C. M.Nwoke, B. E.. Urinary schistosomiasis among school children in an endemic community in south-eastern Nigeria. Appl Parasitol 1995;36(1):34-40.

### ***Ndyomugenyi 2001***

Ndyomugenyi, R.Minjas, J. N.. Urinary schistosomiasis in schoolchildren in Dar-es-Salaam, Tanzania, and the factors influencing its transmission. Ann Trop Med Parasitol 2001;95(7):697-706.

### ***Ng'andu 1988***

Ng'andu, N. H.. The use of Baye's theorem and other indices of agreement in evaluating the use of reagent strips in screening rural schoolchildren for *Schistosoma haematobium* in Zambia. Int J Epidemiol 1988;17(1):202-8.

### ***Ngasala 2020 Mta Dam area***

Ngasala, B.Juma, H.Mwaiswelo, R. O.. The usefulness of indirect diagnostic tests for *Schistosoma haematobium* infection after repeated rounds of mass treatment with praziquantel in Mpwapwa and Chakechake districts in Tanzania. International Journal of Infectious Diseases 2020.

### ***Ngasala 2020 Uwandani Shehia***

Ngasala, B.Juma, H.Mwaiswelo, R. O.. The usefulness of indirect diagnostic tests for *Schistosoma haematobium* infection after repeated rounds of mass treatment with praziquantel in Mpwapwa and Chakechake districts in Tanzania. *International Journal of Infectious Diseases* 2020.

### ***Nwaorgu 1992***

Nwaorgu, O. C.Anigbo, E. U.. The diagnostic value of haematuria and proteinuria in *Schistosoma haematobium* infection in southern Nigeria. *J Helminthol* 1992/09/01;66(3):177-85.

### ***Ofori 1986***

Ofori-Adjei, D.Adjepon-Yamoah, K. K.Ashitey, G. A.Osei-Tutu, E.. Screening methods for urinary schistosomiasis in an endemic area (the Kraboa/Coaltar district of Ghana). *Ann Trop Med Parasitol* 1986;80(3):365-6.

### ***Okeke 2014 (LPA)***

Okeke, O. C.Ubachukwu, P. O.. Performance of three rapid screening methods in the detection of *Schistosoma haematobium* infection in school-age children in Southeastern Nigeria. *Pathog Glob Health* 2014;108(2).

### ***Okeke 2014 (MPA)***

Okeke, O. C.Ubachukwu, P. O.. Performance of three rapid screening methods in the detection of *Schistosoma haematobium* infection in school-age children in Southeastern Nigeria. *Pathog Glob Health* 2014;108(2).

### ***Onayade 1996***

Onayade, A. A.Abayomi, I. O.Fabiyi, A. K.. Urinary schistosomiasis: options for control within endemic rural communities: a case study in south-west Nigeria. *Public Health* 1996;110:221-7.

### ***Poggensee 2000 (HPA)***

Poggensee, G.Krantz, I.Kiwelu, I.Feldmeier, H.. Screening of Tanzanian women of childbearing age for urinary schistosomiasis: validity of urine reagent strip readings and self-reported symptoms. *Bull World Health Organ* 2000;78(4):542-8.

### ***Poggensee 2000 (LPA)***

Poggensee, G.Krantz, I.Kiwelu, I.Feldmeier, H.. Screening of Tanzanian women of childbearing age for urinary schistosomiasis: validity of urine reagent strip readings and self-reported symptoms. *Bull World Health Organ* 2000;78(4):542-8.

### ***Polman 1995***

Polman, K.Stelma, F. F.Gryseels, B.Van Dam, G. J.Talla, I.Niang, M.Van Lieshout, L.Deelder, A. M.. Epidemiologic application of circulating antigen detection in a recent *Schistosoma mansoni* focus in northern Senegal. *Am J Trop Med Hyg* 1995;53(2):152-7.

### ***Pugh 1980***

Pugh, R. N.Bell, D. R.Gilles, H. M.. Malumfashi Endemic Diseases Research Project, XV. The potential medical importance of bilharzia in northern Nigeria: a suggested rapid, cheap and effective solution for control of *Schistosoma haematobium* infection. *Ann Trop Med Parasitol* 1980;74(6):597-613.

### ***Rasendramino 1998***

Rasendramino, M. H.Rajaona, H. R.Ramarokoto, C. E.Ravaoalimalala, V. E.Leutscher, P.Cordonnier, D.Esterre, P.. [Prevalence of uro-nephrologic complications of urinary bilharziasis in hyperendemic focus in Madagascar]. Nephrologie 1998;19(6):341-5.

### ***Robinson 2009***

Robinson, E.Picon, D.Sturrock, H. J.Sabasio, A.Lado, M.Kolaczinski, J.Brooker, S.. The performance of haematuria reagent strips for the rapid mapping of urinary schistosomiasis: field experience from Southern Sudan. Trop Med Int Health 2009;14(12):1484-7.

### ***Rollinson 2005***

Rollinson, D.Klinger, E. V.Mgeni, A. F.Khamis, I. S.Stothard, J. R.. Urinary schistosomiasis on Zanzibar: application of two novel assays for the detection of excreted albumin and haemoglobin in urine. J Helminthol 2005;79(3):199-206.

### ***Sarda 1986***

Sarda, R. K.. Frequency of haematuria and proteinuria in relation to prevalence and intensity of Schistosoma haematobium infection in Dar es Salaam, Tanzania. East Afr Med J 1986;63(2):105-8.

### ***Savioli 1990***

Savioli, L.Hatz, C.Dixon, H.Kisumku, U. M.Mott, K. E.. Control of morbidity due to Schistosoma haematobium on Pemba Island: egg excretion and hematuria as indicators of infection. Am J Trop Med Hyg 1990;43(3):289-95.

### ***Sellin 1982***

Sellin, B.Simonkovich, E.Ovazza, L.Sellin, E.Desfontaine, M.Rey, J. L.. [Value of macroscopic urine examination and reagent strips for the detection of hematuria and proteinuria in the mass diagnosis of urinary schistosomiasis, before and after treatment] [Valeur de l'examen macroscopique des urines et des bandelettes réactives pour la détection de l'hématurie et de la protéinurie dans le diagnostic de masse de la schistosomiase urinaire, avant et après traitement.]. Med Trop (Mars) 1982;42(5):521-6.

### ***Shane 2011***

Shane, H. L.Verani, J. R.Abudho, B.Montgomery, S. P.Blackstock, A. J.Mwinzi, P. N.Butler, S. E.Karanja, D. M.Secor, W. E.. Evaluation of urine CCA assays for detection of Schistosoma mansoni infection in Western Kenya. PLoS Negl Trop Dis 2011 Jan 25;5(1):e951.

### ***Shaw 1998***

Shaw, D. J.Picquet, M.Ly, A.Sambou, B.Vercruysse, J.. Evaluation of dipsticks in Schistosoma haematobium infections in four villages in the middle valley of the Senegal River Basin, Senegal. Trans R Soc Trop Med Hyg 1998;92(6):634-5.

### ***Sheele 2013***

Sheele, J. M.Kihara, J. H.Baddorf, S.Byrne, J.Ravi, B.. Evaluation of a novel rapid diagnostic test for Schistosoma haematobium based on the detection of human immunoglobulins bound to filtered Schistosoma haematobium eggs. Trop Med Int Health 2013/01/22;18(4):477-84.

### ***Song 2018***

Song, HB.Kim, J.Jin, Y.Lee, JS.Jeoung, HG.Lee, YH.Saeed, AAW.Hong, ST.. Comparison of ELISA and Urine Microscopy for Diagnosis of Schistosoma haematobium Infection. Journal of Korean Medical Science 2018;33(33).

### ***Sousa 2020***

Sousa, SRM.Nogueira, JFC.Dias, IHL.Fonseca, ÁLS.Favero, V.Geiger, SM.Enk, MJ.. The use of the circulating cathodic antigen (CCA) urine cassette assay for the diagnosis and assessment of cure of Schistosoma mansoni infections in an endemic area of the Amazon region. Revista da Sociedade Brasileira de Medicina Tropical 2020;53.

### ***Standley 2010***

Standley, C. J.Lwambo, N. J.Lange, C. N.Kariuki, H. C.Adriko, M.Stothard, J. R.. Performance of circulating cathodic antigen (CCA) urine-dipsticks for rapid detection of intestinal schistosomiasis in schoolchildren from shoreline communities of Lake Victoria. Parasit Vectors 2010;3(1):7.

### ***Stephenson 1984***

Sensitivity and specificity of reagent strips in screening of Kenyan children for Schistosoma haematobium infection. Stephenson, L. S.Latham, M. C.Kinoti, S. N.Oduori, M. L.. Am J Trop Med Hyg 1984;33(5):862-71.

### ***Stothard 2009a***

Stothard, J. R.Sousa-Figueiredo, J. C.Standley, C.Van Dam, G. J.Knopp, S.Utzinger, J.Ameri, H.Khamis, A. N.Khamis, I. S.Deelder, A. M.Mohammed, K. A.Rollinson, D.. An evaluation of urine-CCA strip test and fingerprick blood SEA-ELISA for detection of urinary schistosomiasis in schoolchildren in Zanzibar. Acta Trop 2009;111(1).

### ***Stothard 2009b***

Russell Stothard, J.Sousa-Figueiredo, J. C.Simba Khamis, I.Garba, A.Rollinson, D.. Urinary schistosomiasis-associated morbidity in schoolchildren detected with urine albumin-to-creatinine ratio (UACR) reagent strips. J Pediatr Urol 2009;5(4).

### ***Tanner 1983 (Liberia)***

Tanner, M.Holzer, B.Marti, H. P.Saladin, B.Degrémont, A. A.. Frequency of haematuria and proteinuria among Schistosoma haematobium infected children of two communities from Liberia and Tanzania. Acta Trop 1983;40(3):231-7.

### ***Tanner 1983 (Tanzania)***

Tanner, M.Holzer, B.Marti, H. P.Saladin, B.Degrémont, A. A.. Frequency of haematuria and proteinuria among Schistosoma haematobium infected children of two communities from Liberia and Tanzania. Acta Trop 1983;40(3):231-7.

### ***Tchuem Tchuente 2012***

Tchuem Tchuente, L. A.Kuete Fouodo, C. J.Kamwa Ngassam, R. I.Sumo, L.Dongmo Noumedem, C.Kenfack, C. M.Gipwe, N. F.Nana, E. D.Stothard, J. R.Rollinson, D.. Evaluation of circulating cathodic

antigen (CCA) urine-tests for diagnosis of *Schistosoma mansoni* infection in Cameroon. PLoS Negl Trop Dis 2012;6(7):e1758.

### **Traore 1998**

Traore, M.Traore, H. A.Kardorff, R.Diarra, A.Landoure, A.Vester, U.Doehring, E.Bradley, D. J.. The public health significance of urinary schistosomiasis as a cause of morbidity in two districts in Mali. Am J Trop Med Hyg 1998;59(3):407-13.

### **Uga 1989**

Uga, S.Gatika, S. M.Kimura, E.Muhoho, D. N.Waiyaki, P. G.. Enzyme-linked immunosorbent assay as a diagnostic method for schistosomiasis haematobium. Standardization and application in the field. J Trop Med Hyg 1989;92(6):407-11.

### **Ugbomoiko 2009a**

Ugbomoiko, U. S. Obiezue, R. N. Ogunniyi, T. A. Ofoezie, I. E.. Diagnostic accuracy of different urine dipsticks to detect urinary schistosomiasis: a comparative study in five endemic communities in Osun and Ogun States, Nigeria. J Helminthol 2008/12/11;83(3):203-9.

### **Ugbomoiko 2009b**

Ugbomoiko, Uade SamuelDalumo, VictorAriza, LianaBezerra, Fernando Schemelzer MoraesHeukelbach, Jorg. A simple approach improving the performance of urine reagent strips for rapid diagnosis of urinary schistosomiasis in Nigerian schoolchildren. Memorias do Instituto Oswaldo Cruz 2009;104(3).

### **Van Lieshout 1995**

Van Lieshout, L.Panday, U. G.De Jonge, N.Krijger, F. W.Oostburg, B. F.Polderman, A. M.Deelder, A. M.. Immunodiagnosis of schistosomiasis mansoni in a low endemic area in Surinam by determination of the circulating antigens CAA and CCA. Acta Trop 1995;59(1):19-29.

### **Verlé 1994**

Verlé, P.Stelma, F.Desreumaux, P.Dieng, A.Diaw, O.Kongs, A.Niang, M.Sow, S.Talla, I.Sturrock, R. F.et al.. Preliminary study of urinary schistosomiasis in a village in the delta of the Senegal river basin, Senegal. Trans R Soc Trop Med Hyg 1994;88(4):401-5.

### **Vonghachack 2017**

Vonghachack, Y.Sayasone, S.Khieu, V.Bergquist, R.van Dam, G. J.Hoekstra, P. T.Corstjens, PlamNickel, B.Marti, H.Utzinger, J.Muth, S.Odermatt, P.. Comparison of novel and standard diagnostic tools for the detection of *Schistosoma mekongi* infection in Lao People's Democratic Republic and Cambodia. Infect Dis Poverty 2017/08/11;6(1):127.

### **Wilkins 1979**

Wilkins, H. A.Goll, P.Marshall, T. F.Moore, P.. The significance of proteinuria and haematuria in *Schistosoma haematobium* infection. Trans R Soc Trop Med Hyg 1979;73(1):74-80.

### **Xu 2014**

Xu, X. Zhang, Y. Lin, D. Zhang, J. Xu, J. Liu, Y. M. Hu, F. Qing, X. Xia, C. Pan, W.. Serodiagnosis of *Schistosoma japonicum* infection: genome-wide identification of a protein marker, and assessment of its diagnostic validity in a field study in China. Lancet Infect Dis 2014/03/25;14(6):489-97.



### **Xu 2015**

Xu, J. Guan, Z. X. Zhao, B. Wang, Y. Y. Cao, Y. Zhang, H. Q. Zhu, X. Q. He, Y. K. Xia, C. M.. DNA detection of *Schistosoma japonicum*: diagnostic validity of a LAMP assay for low-intensity infection and effects of chemotherapy in humans. *PLoS Negl Trop Dis* 2015/04/16;9(4):e0003668.

### **Zhang 2020**

Zhang, L. J.Mwanakasale, V.Xu, J.Sun, L. P.Yin, X. M.Zhang, J. F.Hu, M. C.Si, W. M.Zhou, X. N.. Diagnostic performance of two specific *Schistosoma japonicum* immunological tests for screening *Schistosoma haematobium* in school children in Zambia. *Acta Tropica* 2020.

### **Zumstein 1983**

Zumstein, A.. A study of some factors influencing the epidemiology of urinary schistosomiasis at Ifakara (Kilombero District, Morogoro Region, Tanzania). *Acta Trop* 1983;40(3):187-204.

### **Excluded studies**

#### **Ahmed 1993**

Ahmed, M. M.Hussein, H. M.el-Hady, H. M.. Evaluation of cercarial hüllen reaction (CHR) as a diagnostic test in chronic schistosomiasis and as a parameter for reinfection in acute cases. *J Egypt Soc Parasitol* 1993;23(2):365-71.

#### **Alarcon 1997**

Alarcón De Noya, B.Cesari, I. M.Losada, S.Colmenares, C.Balzán, C.Hoebeke, J.Noya, O.. Evaluation of alkaline phosphatase immunoassay comparison with other diagnostic methods in areas of low transmission of schistosomiasis. *Acta Tropica* 1997;66(2):69-78.

#### **Allam 2021**

Allam, A.F.Farag, H.F.Lotfy, W.Fawzy, H.H.Elhadad, H.Shehab, A.Y.. Comparison among FLOTAC, Kato-Katz and formalin ether concentration techniques for diagnosis of intestinal parasitic infections in school children in an Egyptian rural setting. *Parasitology* 2021;148(3):289-294.

#### **Ansell 2002**

Ansell, J.Guyatt, H L. Comparative cost-effectiveness of diagnostic tests for urinary schistosomiasis and the implications for school health programmes (Structured abstract). *Annals of Tropical Medicine and Parasitology* 2002;96(2):145-153.

#### **Armoo 2020**

Armoo, S.Cunningham, L. J.Campbell, S. J.Aboagye, F. T.Boampong, F. K.Hamidu, B. A.Osei-Atweneboana, M. Y.Stothard, J. R.Adams, E. R.. Detecting *Schistosoma mansoni* infections among pre-school-aged children in southern Ghana: A diagnostic comparison of urine-CCA, real-time PCR and Kato-Katz assays. *BMC Infectious Diseases* 2020;20(1).

#### **Bärenbold 2018**

Bärenbold, O.Garba, A.Colley, D. G.Fleming, F. M.Haggag, A. A.Ramzy, R. M. R.Assaré, R. K.Tukahebwa, E. M.Mbonigaba, J. B.Bucumi, V.Kebede, B.Yibi, M. S.Meité, A.Coulibaly, J. T.N'Goran, E. K.Tchuem Tchuente, L. A.Mwinzi, P.Utzinger, J.Vounatsou, P.. Translating preventive chemotherapy prevalence

thresholds for *Schistosoma mansoni* from the Kato-Katz technique into the point-of-care circulating cathodic antigen diagnostic test. PLoS Negl Trop Dis 2018;12.

### **Becker 2015**

Becker, S. L.Marti, H.Zimmermann, S.Vidacek, D.Herrmann, M.Utzinger, J.Schnabel, P. A.Bohle, R. M.. Application in Europe of a urine-based rapid diagnostic test for confirmation of *Schistosoma mansoni* infection in migrants from endemic areas. Euro Surveill 2015;20(23).

### **Belo 2009**

Belo, S.Rompão, H.Sousa, B. C.Gonçalves, L.Ramajo, V.Oleaga, A.Grácio, A.. Diagnostic potential of IgG4/ELISA in schistosomiasis intercalatum infection. Tropical Medicine and International Health 2009;14.

### **Buonfrate 2018**

Buonfrate, D.Rodari, P.Brunelli, D.Degani, M.Ragusa, A.Tais, S.Todeschini, M.Bisoffi, Z.. Diagnostic study on an immunochromatographic rapid test for schistosomiasis: Comparison between use on serum and on blood spot from fingerprick. BMJ Open 2018;8(3).

### **Chen 2011**

Chen, N. G.Lin, D. D.Xie, S. Y.Wang, Q. Z.Tang, L.Liu, Y. M.Zeng, X. J.Liu, H. Y.Huang, M. J.Chen, H. G.. [Diagnostic efficiency of Indirect Hemagglutination Assay Kit for antibody detection of schistosomiasis japonica]. Zhongguo Xue Xi Chong Bing Fang Zhi Za Zhi 2011;23(4):377-80.

### **Clements 2017**

Clements, M. N.Donnely, C. A.Fenwick, A.Kabatereine, N. B.Knowles, S. C. L.Meité, A.N'Goran, E. K.Nalule, Y.Nogaro, S.Phillips, A. E.Tukahebwa, E. M.Fleming, F. M.. Interpreting ambiguous 'trace' results in *Schistosoma mansoni* CCA Tests: Estimating sensitivity and specificity of ambiguous results with no gold standard. PLoS Negl Trop Dis 2017;11(12).

### **Clements 2018**

Clements, M. N.Corstjens, P. L. A. M.Binder, S.Campbell, C. H.De Dood, C. J.Fenwick, A.Harrison, W.Kayugi, D.King, C. H.Kornelis, D.Ndayishimiye, O.Ortu, G.Lamine, M. S.Zivieri, A.Colley, D. G.Van Dam, G. J.. Latent class analysis to evaluate performance of point-of-care CCA for low-intensity *Schistosoma mansoni* infections in Burundi. Parasites and Vectors 2018;11(1):111.

### **Corstjens 2015**

Corstjens, P. L. A. M.Nyakundi, R. K.De Dood, C. J.Kariuki, T. M.Ochola, E. A.Karanja, D. M. S.Mwinzi, P. N. M.Van Dam, G. J.. Improved sensitivity of the urine CAA lateral-flow assay for diagnosing active *Schistosoma* infections by using larger sample volumes. Parasites and Vectors 2015;8(1).

### **Diab 2019**

Diab, R. G.Mady, R. F.Tolba, M. M.Ghazala, R. A.. Urinary circulating DNA and circulating antigen for diagnosis of schistosomiasis mansoni: a field study. Trop Med Int Health 2019;24(3):371-378.

### **Diab 2021**

Diab, R.G.Tolba, M.M.Ghazala, R.A.Abu-Sheasha, G.A.Webster, B.L.Mady, R.F.. Intestinal schistosomiasis: Can a urine sample decide the infection? Parasitol. Int. 2021;80.

### ***Downs 2015***

Downs, J. A. Corstjens, P. L. A. M. Mngara, J. Lutonja, P. Isingo, R. Urassa, M. Kornelis, D. van Dam, G. J.. Correlation of serum and dried blood spot results for quantitation of *Schistosoma* circulating anodic antigen: A proof of principle. *Acta Tropica* 2015;150:59-63.

### ***Elhag 2011***

Elhag, S. M. Abdelkareem, E. A. Yousif, A. S. Frah, E. A. Mohamed, A. B.. Detection of schistosomiasis antibodies in urine patients as a promising diagnostic marker. *Asian Pac J Trop Med* 2011;4(10):773-7.

### ***Enk 2012***

Enk, M. J. Oliveira e Silva, G. Rodrigues, N. B.. Diagnostic accuracy and applicability of a PCR system for the detection of *Schistosoma mansoni* DNA in human urine samples from an endemic area. *PLoS One* 2012;7(6).

### ***Ephraim 2015***

Ephraim, R. K. D. Abongo, C. K. Sakyi, S. A. Brenyah, R. C. Diabor, E. Bogoch, I. I.. Microhaematuria as a diagnostic marker of *Schistosoma haematobium* in an outpatient clinical setting: results from a cross-sectional study in rural Ghana. *Tropical Doctor* 2015;45(3):194-196.

### ***Espirito-Santo 2014***

Espirito-Santo, M. C. Sanchez, M. C. Sanchez, A. R. Alvarado-Mora, M. V. Castilho, V. L. Gonçalves, E. M. Luna, E. J. Gryscek, R. C.. Evaluation of the sensitivity of IgG and IgM ELISA in detecting *Schistosoma mansoni* infections in a low endemicity setting. *Eur J Clin Microbiol Infect Dis* 2014;33(12):2275-84.

### ***Etard 2004***

Etard, J. E.. [Modelling sensitivity, specificity and predictive values of hematuria testing using reagent sticks in the diagnosis of *Schistosoma haematobium* infection]. *Bull Soc Pathol Exot* 2004;97(1):24-8.

### ***Evengård 1990***

Evengård, B.. Diagnostic and clinical aspects of schistosomiasis in 182 patients treated at a Swedish ward for tropical diseases during a 10-year period. *Scand J Infect Dis* 1990;22(5):585-94.

### ***Fenta 2020***

Fenta, A. Hailu, T. Alemu, M. Amor, A.. Performance Evaluation of Diagnostic Methods for *Schistosoma mansoni* Detection in Amhara Region, Northwest Ethiopia. *BioMed Research International* 2020.

### ***Ferrer 2020***

Ferrer, E. Villegas, B. Mughini-Gras, L. Hernández, D. Jiménez, V. Catalano, E. Incani, R. N.. Diagnostic performance of parasitological, immunological and molecular tests for the diagnosis of *Schistosoma mansoni* infection in a community of low transmission in Venezuela. *Acta Tropica* 2020.

### ***Fofana 2017***

Fofana, H. K. M. Saye, R. Becker, S. L. Landoure, A. Polman, K. Chappuis, F. Boelaert, M. Traore, M. S. Utzinger, J. Sacko, M.. Diagnostic accuracy of point-of-care circulating cathodic antigen, formalin-ether concentration and Kato-Katz techniques for *Schistosoma mansoni* infection in Niono, Mali. *Tropical Medicine and International Health* 2017;22.

### ***Fofana 2019***

Fofana, H. K. M.Schwarzkopf, M.Doumbia, M. N.Saye, R.Nimmesgern, A.Landouré, A.Traoré, M. S.Mertens, P.Uttinger, J.Sacko, M.Becker, S. L.. Prevalence of giardia intestinalis infection in schistosomiasis-endemic areas in south-central Mali. Tropical Medicine and Infectious Disease 2019;4(2).

### ***Galappaththi-Arachchige 2018***

Galappaththi-Arachchige, H. N.Holmen, S.Koukounari, A.Kleppa, E.Pillay, P.Sebitloane, M.Ndhlovu, P.Van Lieshout, L.Vennervald, B. J.Gundersen, S. G.Taylor, M.Kjetland, E. F.. Evaluating diagnostic indicators of urogenital Schistosoma haematobium infection in young women: A cross sectional study in rural South Africa. PLoS ONE 2018;13(2).

### ***Gargioni 2008***

Gargioni, C.Da Silva, R. M.Thomé, C. M.Quadros, C. M. D. S.Kanamura, H. Y.. Serology as a diagnostic tool for surveillance and control of schistosomiasis in Holambra, São Paulo State, Brazil. Cadernos de Saude Publica 2008;24(2):373-379.

### ***Graeff-Teixeira 2020***

Graeff-Teixeira, C.Favero, V.de Souza, R. P.Pascoal, V. F.Bittencourt, H. R.Fukushige, M.Geiger, S. M.Negrão-Corrêa, D.. Use of Schistosoma mansoni soluble egg antigen (SEA) for antibody detection and diagnosis of schistosomiasis: The need for improved accuracy evaluations of diagnostic tools. Acta Trop 2020;215.

### ***Grenfell 2014***

Grenfell, R. F.Coelho, P. M.Taboada, D.de Mattos, A. C.Davis, R.Harn, D. A.. Newly established monoclonal antibody diagnostic assays for Schistosoma mansoni direct detection in areas of low endemicity. PLoS One 2014;9(1).

### ***Guegan 2019***

Guegan, H.Fillaux, J.Charpentier, E.Robert-Gangneux, F.Chauvin, P.Guemas, E.Boissier, J.Valentin, A.Cassaing, S.Gangneux, JP.Berry, A.Iriart, X.. Real-time PCR for diagnosis of imported schistosomiasis. PLoS 2019;13(9).

### ***Hall 1999***

Hall, A.Fentiman, A.. Blood in the urine of adolescent girls in an area of Ghana with a low prevalence of infection with Schistosoma haematobium. Trans R Soc Trop Med Hyg 1999;93(4):411-2.

### ***Hamidu 2018***

Hamidu, B. A. B.Asuming-Brempong, E. E.Idun, B. B.Osei-Atweneboana, M. M.. Comparison of pcr diagnostic with Kato Katz technique for diagnosis of soil transmitted helminths and schistosomiasis infections in the ayaloloo cluster of schools in the Accra metropolis of Ghana. American Journal of Tropical Medicine and Hygiene 2018;99(4):396.

### ***Homsana 2020***

Homsana, A.Odermatt, P.Southisavath, P.Yajima, A.Sayasone, S.. Cross-reaction of POC-CCA urine test for detection of Schistosoma mekongi in Lao PDR: A cross-sectional study. Infect. Dis. Pover. 2020;9(1).

### ***Honkpehedji 2020***

Honkpehedji, Y. J.Adegnika, A. A.Dejon-Agobe, J. C.Zinsou, J. F.Mba, R. B.Gerstenberg, J.Rakotozandrindrainy, R.Rakotoarivelo, R. A.Rasamoelina, T.Sicuri, E.Schwarz, N. G.Corstjens, PlamHoekstra, P. T.van Dam, G. J.Kreidenweiss, A.. Prospective, observational study to assess the performance of CAA measurement as a diagnostic tool for the detection of *Schistosoma haematobium* infections in pregnant women and their child in Lambaréné, Gabon: study protocol of the freeBILy clinical trial in Gabon. BMC Infect Dis 2020;20(1):718.

### ***Ibidapo 2005***

Ibidapo, C. A.Mafe, M. A.Awobimpe, O. L.. Comparison of three diagnostic methods for the determination of prevalence of urinary schistosomiasis among residents and pupils of Badagry Area of Lagos State, Nigeria. African Journal of Biotechnology 2005;4(11):1325-1328.

### ***Kanamura 1992***

Yohko Kanamura, HerminiaHoshino-Shimizu, SumieSilva, Luiz Caetano da. *Schistosoma mansoni* cercaria and schistosomulum antigens in serodiagnosis of schistosomiasis. Bull. Pan Am. Health Organ 1992;26(3):220-229.

### ***Kanamura 1998***

Kanamura, Herminia YohkoDias, Luiz Candido de SouzaSilva, Rita Maria daGlasser, Carmen MorenoPatucci, Rosa Maria de JesusVelloso, Sylvia Amaral GurgelAntunes, Jose Leopoldo Ferreira. A comparative epidemiologic study of specific antibodies (IgM and IgA) and parasitological findings in an endemic area of low transmission of *Schistosoma mansoni*. Rev Inst Med Trop Sao Paulo 1998;40(2):85-91.

### ***Kanamura 2002***

Kanamura, H. Y.Silva, R. M.Chiodelli, S. G.Glasser, C. M.Dias, L. C.. IgM-immunofluorescence test as a diagnostic tool for epidemiologic studies of Schistosomiasis in low endemic areas. Mem Inst Oswaldo Cruz 2002;97(4):485-9.

### ***Knight 1976***

Knight, W. B.Hiatt, R. A.Cline, B. L.Ritchie, L. S.. A modification of the formol-ether concentration technique for increased sensitivity in detecting *Schistosoma mansoni* eggs. Am J Trop Med Hyg 1976;25(6):818-23.

### ***Kobayashi 1994***

Kobayashi, JunCarrilho, Flair JoseShimabukuro, TetsuSilva, Luiz Caetano daSoares, Elza CotrimNishimura, Nancy FusaeChieffi, Pedro PauloSato, Yoshiya. Gelatin particle indirect agglutination test for serodiagnosis of schistosomiasis: comparative study with enzyme-linked immunosorbent assay. Rev. Inst. Med. Trop. São Paulo 1994;36(5):389-94.

### ***Koukounari 2009***

Koukounari, A.Webster, J. P.Donnelly, C. A.Bray, B. C.Naples, J.Bosompem, K.Shiff, C.. Sensitivities and specificities of diagnostic tests and infection prevalence of *Schistosoma haematobium* estimated from data on adults in villages northwest of Accra, Ghana. Am J Trop Med Hyg 2009;80(3):435-41.

### **Lee 2011**

Lee, Y. M.Hancock, K.Noh, J.Tsang, V. C. W.Wilkins, P. P.. Development of a serological diagnostic assay for *Schistosoma mansoni* using recombinant SM25. American Journal of Tropical Medicine and Hygiene 2011;85(6):150.

### **Lier 2009**

Lier, T.Simonsen, G. S.Wang, T.Lu, D.Haukland, H. H.Vennervald, B. J.Johansen, M. V.. Low sensitivity of the formol-ethyl acetate sedimentation concentration technique in low-intensity *Schistosoma japonicum* infections. PLoS Negl Trop Dis 2009;3(2).

### **Lima 1998**

Lima, Virgília L. C.Guercio, Vânia M. F.Rangel, OsiasKanamura, Hermínia YokoDias, Luiz Candido de Souza. Immunofluorescence test on *Schistosoma mansoni* worm paraffin sections (IgM-IFT) for the study of schistosomiasis transmission in Campinas, São Paulo, Brazil. Mem Inst Oswaldo Cruz 1998;93:283-8.

### **Lodh 2014**

Lodh, N.Mikita, K.Naples, J. M.Bosompem, K. M.Quartey, J.Shiff, C. J.. Detecting multi schistosome species dna in single urine sample by lamp: A novel diagnostic test for schistosomiasis. American Journal of Tropical Medicine and Hygiene 2014;91(5):348.

### **Long 1982**

Long, G. W.Yogore, M. G.Lewert, R. M.Blas, B. L.Pelley, R. P.. Efficacy of purified *Schistosoma japonicum* egg antigens for ELISA serodiagnosis of human Schistosomiasis japonica: specificity and sensitivity. Am J Trop Med Hyg 1982;31(5):1006-14.

### **Marti 2020**

Marti, H.Halbeisen, S.Bausch, K.Nickel, B.Neumayr, A.. Specificity of the POC-CCA urine test for diagnosing *S. mansoni* schistosomiasis. Travel Med Infect Dis 2020;33.

### **McManus 2018**

McManus, D.Gordon, C.Weerakoon, K.Cai, P.Olveda, R.Gray, D.Ross, A.Li, Y.Williams, G.. Research challenges and needs for control and elimination of schistosomiasis: New diagnostics. American Journal of Tropical Medicine and Hygiene 2018;99(4):20.

### **Midzi 2003**

Midzi, N.Ndhlovu, P. D.Nyanga, L.Kjetland, E. F.Reimert, C. M.Vennervald, B. J.Gomo, E.Mudenge, G.Friis, H.Gundersen, S. G.Mduluza, T.. Assessment of eosinophil cationic protein as a possible diagnostic marker for female genital schistosomiasis in women living in a *Schistosoma haematobium* endemic area. Parasite Immunol 2003;25(11):581-8.

### **Midzi 2020**

Midzi, N.Bärenbold, O.Manangazira, P.Phiri, I.Mutsaka-Makuvaza, M. J.Mhlanga, G.Utzinger, J.Vounatsou, P.. Accuracy of different diagnostic techniques for *Schistosoma haematobium* to estimate treatment needs in Zimbabwe: Application of a hierarchical bayesian EGG count model. PLoS Neglected Tropical Diseases 2020;14(8):1-15.

### **Montenegro 1999**

Montenegro, Silvia Maria LucenaSilva, Joanne D.arc Bezerra, daBrito, Maria Edileuza Felinto deCarvalho Júnior, Luiz Bezerra. Dot enzyme-linked immunosorbent assay (dot-ELISA) for schistosomiasis diagnosis using dacron as solid-phase. Rev. Soc. Bras. Med. Trop 1999;32(2):139-43.

### **Mu 2020**

Mu, Y.Cai, P.Olveda, R.M.Ross, A.G.Olveda, D.U.McManus, D.P.. Parasite-derived circulating microRNAs as biomarkers for the detection of human Schistosoma japonicum infection. Parasitology 2020;147(8):889-896.

### **Nakamura 2017**

Nakamura, I.Yagi, K.Kumagai, T.Ohta, N.. Positive fecal occult blood test as a diagnostic cue for Schistosoma mansoni infection in a developed country. IDCases 2017;10:108-109.

### **Neumayr 2019**

Neumayr, A.Chernet, A.Sydow, V.Kling, K.Kuenzli, E.Marti, H.Paris, D. H.Nickel, B.Labhardt, N. D.. Performance of the point-of-care circulating cathodic antigen (POC-CCA) urine cassette test for follow-up after treatment of S. mansoni infection in Eritrean refugees. Travel Med Infect Dis 2019;28:59-63.

### **Ngasala 2015**

Ngasala, B.. Diagnostic performance of screening methods for urinary schistosomiasis in a school-based antihelminthic program in rural endemic District, Tanzania. American Journal of Tropical Medicine and Hygiene 2015;93(4):160.

### **Ochodo 2015**

Ochodo, Eleanor AGopalakrishna, GowriSpek, BeaReitsma, Johannes Bvan, Lieshout LisettePolman, KatjaLamberton, PoppyBossuyt, Patrick MmLeefflang, Mariska Mg. Circulating antigen tests and urine reagent strips for diagnosis of active schistosomiasis in endemic areas. Cochrane Database of Systematic Reviews 2015;(3).

### **Ochola 2012**

Ochola, E. A.Van Lieshout, L.Foo, K. T.Williamson, J. M.Brienen, E.Matete, D. O.Mwinzi, P. N.Montgomery, S. P.Verweij, J. J.Secor, W. E.Karanja, D. M.. Comparison of diagnostic methods against PCR for the detection of schistosoma mansoni among school children in western Kenya. American Journal of Tropical Medicine and Hygiene 2012;87(5):434.

### **Oliveira 2018**

Oliveira, W. J.Magalhães, F. D. C.Elias, A. M. S.de Castro, V. N.Favero, V.Lindholz, C. G.Oliveira, Á A.Barbosa, F. S.Gil, F.Gomes, M. A.Graeff-Teixeira, C.Enk, M. J.Coelho, P. M. Z.Carneiro, M.Negrão-Corrêa, D. A.Geiger, S. M.. Evaluation of diagnostic methods for the detection of intestinal schistosomiasis in endemic areas with low parasite loads: Saline gradient, Helmintex, Kato-Katz and rapid urine test. PLoS Neglected Tropical Diseases 2018;12(2).

### **Pieron 1980**

Pieron, R.Lesobre, B.Coutris, G.. Diagnostic value of parasitologic examinations and of indirect immunofluorescence test in S. haematobium schistosomiasis. Medecine Tropicale 1980;40(3):259-264.



### **Rostron 2019**

Rostron, P.Pennance, T.Bakar, F.Rollinson, D.Knopp, S.Allan, F.Kabole, F.Ali, S. M.Ame, S. M.Webster, B. L.. Development of a recombinase polymerase amplification (RPA) fluorescence assay for the detection of *Schistosoma haematobium*. *Parasites and Vectors* 2019;12(1):514.

### **Ruppel 1990**

Ruppel, A.Idris, M. A.Sulaiman, S. M.Hilali, A. M.. *Schistosoma mansoni* diagnostic antigens (Sm 31/12): a sero-epidemiological study in the Sudan. *Trop Med Parasitol* 1990;41(2):127-30.

### **Sarda 1985**

Sarda, R. K.Simonsen, P. E.Mahikwano, L. F.. Urban transmission of urinary schistosomiasis in Dar es Salaam, Tanzania. *Acta Trop* 1985;42(1):71-8.

### **Sarhan 2014**

Sarhan, R. M.Aminou, H. A.Saad, G. A. R.Ahmed, O. A.. Comparative analysis of the diagnostic performance of adult, cercarial and egg antigens assessed by ELISA, in the diagnosis of chronic human *Schistosoma mansoni* infection. *Parasitology Research* 2014;113(9):3467-3476.

### **Sayed 2000**

Sayed, H. A.el Dusoki, H. H.el Ayyat, A. A.Kamel, L. M.Tawfik, S. A.el Nahal, H. S.Sabry, H. Y.Amer, N. M.. Assessment of the diagnostic system of *Schistosoma* infection at rural health unit level, Egypt. *J Egypt Soc Parasitol* 2000;30(2):487-503.

### **Schwarz 2014**

Schwarz, N. G.Rakotozandrindrainy, R.Heriniaina, J. N.Randriamampionona, N.Hahn, A.Hogan, B.Frickmann, H.Dekker, D.Poppert, S.Razafindrabe, T.Rakotondrainiarivelo, J. P.May, J.Hagen, R. M.. *Schistosoma mansoni* in schoolchildren in a Madagascan highland school assessed by PCR and sedimentation microscopy and Bayesian estimation of sensitivities and specificities. *Acta Trop* 2014;134:89-94.

### **Sheele 2016**

Sheele, JmBaddorf, SKihara, Jh. *Schistosoma haematobium* infection is associated with increased urine foam. *Pediatrics international* 2016;58(11):1243-1245.

### **Silva-Moraes 2019**

Silva-Moraes VShollenberger LMCastro-Borges WRabello ALTHarn DAMedeiros LCSJeremias WJSiqueira LMVPereira CSSPedrosa MLCAmeida NBFAlmeida ALambertucci JRCarneiro NFFCoelho PMZGrenfell RFQ. Serological proteomic screening and evaluation of a recombinant egg antigen for the diagnosis of low-intensity *Schistosoma mansoni* infections in endemic area in Brazil. *PLoS neglected tropical diseases* 2019;13(3).

### **Siziya 1996**

Siziya, S.Mushanga, M.Marufu, T.Mudiyarabikwa, O.. Diagnostic and cost comparisons of a questionnaire against a chemical reagent strip test in identifying high risk communities for *Schistosoma haematobium* infection in northern Zambia. *Cent Afr J Med* 1996;42(2):40-2.

### **Stothard 2006**

Stothard, J. R.Kabatereine, N. B.Tukahebwa, E. M.Kazibwe, F.Rollinson, D.Mathieson, W.Webster, J. P.Fenwick, A.. Use of circulating cathodic antigen (CCA) dipsticks for detection of intestinal and urinary schistosomiasis. Acta Tropica 2006;97(2):219-228.

### **Stothard 2020**

Stothard, R.Webster, B. L.. Acute schistosomiasis: Which molecular diagnostic test is best and why. Clinical infectious diseases : an official publication of the Infectious Diseases Society of America 2020.

### **Taylor 1982**

Taylor, P.. Proteinuria as a simple diagnostic test for urinary schistosomiasis in schoolchildren in the rural areas of Zimbabwe. Cent Afr J Med 1982;28(9):216-9.

### **Teesdale 1985**

Teesdale, C. H.Fahringer, K.Chitsulo, L.. Egg count variability and sensitivity of a thin smear technique for the diagnosis of Schistosoma mansoni. Trans R Soc Trop Med Hyg 1985;79(3):369-73.

### **Utzing 2000**

Utzing, J.N'Goran, E. K.Ossey, Y. A.Booth, M.Traoré, M.Lohourignon, K. L.Allangba, A.Ahiba, L. A.Tanner, M.Lengeler, C.. Rapid screening for Schistosoma mansoni in western Cote d'ivoire using a simple school questionnaire. Bulletin of the World Health Organization 2000;78(3):389-398.

### **Utzing 2008**

Utzing, J.Rinaldi, L.Lohourignon, L. K.Rohner, F.Zimmermann, M. B.Tschannen, A. B.N'Goran E, K.Cringoli, G.. FLOTAC: a new sensitive technique for the diagnosis of hookworm infections in humans. Trans R Soc Trop Med Hyg 2008;102(1):84-90.

### **Van Lieshout 1992**

Van Lieshout, L.De Jonge, N.el Masry, N. A.Mansour, M. M.Krijger, F. W.Deelder, A. M.. Improved diagnostic performance of the circulating antigen assay in human schistosomiasis by parallel testing for circulating anodic and cathodic antigens in serum and urine. Am J Trop Med Hyg 1992;47(4):463-9.

### **Viana 2019**

Viana, A. G.Gazzinelli-Guimarães, P. H.Castro, V. N.Santos, YlodRuas, A. C. L.Bezerra, F. S. M.Bueno, L. L.Dolabella, S. S.Geiger, S. M.Phillips, A. E.Fujiwara, R. T.. Discrepancy between batches and impact on the sensitivity of point-of-care circulating cathodic antigen tests for Schistosoma mansoni infection. Acta Trop 2019;197.

### **Vinkeles Melchers 2014**

Vinkeles Melchers, N. V. S.van Dam, G. J.Shaproski, D.Kahama, A. I.Brienen, E. A. T.Vennervald, B. J.van Lieshout, L.. Diagnostic Performance of Schistosoma Real-Time PCR in Urine Samples from Kenyan Children Infected with Schistosoma haematobium: Day-to-day Variation and Follow-up after Praziquantel Treatment. PLoS Neglected Tropical Diseases 2014;8(4).

### **Wang 1992**

Wang, X. Z.. [A highly sensitive diagnostic kit for evaluating therapeutic effect in schistosomiasis cases]. Zhonghua Yi Xue Za Zhi 1992;72(11):686-8,704.

### **Wang 2011**

Wang, M.Li, W. G.Cai, S. F.. The diagnostic value of rSj26-Sj32-IgG-ELISA for acute schistosomiasis japonica. Chinese Journal of Endemiology 2011;30(1):39-43.

### **Wang 2014**

Wang, S.Hu, W.. Development of "-omics" research in Schistosoma spp. and -omics-based new diagnostic tools for schistosomiasis. Front Microbiol 2014;5:313.

### **Weerakoon 2017**

Weerakoon, K. G.Gordon, C. A.Williams, G. M.Cai, P.Gobert, G. N.Olveda, R. M.Ross, A. G.Olveda, D. U.McManus, D. P.. Droplet digital PCR diagnosis of human schistosomiasis: parasite cell-free DNA detection in diverse clinical samples. J Infect Dis 2017.

### **Xu 2018**

Xu, X.Cui, X.Zhu, L.Li, Z.Zhang, Y.Ma, L.Pan, W.. Effects of polymorphisms in the SjSP-13 gene of Schistosoma japonicum on its diagnostic efficacy and immunogenicity. Frontiers in Microbiology 2018;9.

### **Zhang 2000**

Zhang, E. Y.Lou, W. X.Xue, C. L.Wang, Z. J.. [The diagnostic value of combined detection of circulating antigens and antibodies in urine of patients with schistosomiasis japonica]. Zhongguo Ji Sheng Chong Xue Yu Ji Sheng Chong Bing Za Zhi 2000;18(1):24-5.

### **Zheng 2005**

Zheng, L.Xu, X. J.Dong, H. F.. [Development of the specific antibodies and diagnostic antigens of Schistosoma japonicum]. Zhongguo Ji Sheng Chong Xue Yu Ji Sheng Chong Bing Za Zhi 2005;23(6):463-6.

### **Zhou 2014**

Zhou, X. N.. Value of a novel diagnostics of rSP13-ELISA toward schistosomiasis elimination in China. Sci China Life Sci 2014;57(6):647-8.

### **Zhu 2000**

Zhu, C.Tian, H.Lu, L.Li, Y.Feng, Z.Ma, L.Guan, X.. A study on producing monoclonal antibody with one diagnostic marker screened electrophoretically from the urine of individuals infected with Schistosoma japonicum. Diagn Microbiol Infect Dis 2000;38(4):237-41.

### **Zhu 2010**

Zhu, HpYu, ChXia, XDong, GyTang, JFang, LDu, Y. Assessing the diagnostic accuracy of immunodiagnostic techniques in the diagnosis of schistosomiasis japonica: a meta-analysis (Provisional abstract). Parasitology Research 2010;107(5):1067-1073.

# Appendix A - Diagnostic tests for Schistosomiasis for low prevalence settings: a systematic review and Meta-Analysis

## Figures

|                                                                                                                                                              |    |
|--------------------------------------------------------------------------------------------------------------------------------------------------------------|----|
| Figure 1 - PRISMA Flow Diagram.....                                                                                                                          | 4  |
| Figure 2 - Risk of bias and applicability concerns graph: review authors' judgements about each domain presented as percentages across included studies..... | 4  |
| Figure 3 - Risk of bias and applicability concerns summary: review authors' judgements about each domain for each included study.....                        | 5  |
| Figure 4 - Forest plot of CCA1 cassette vs single KK, double KK, quadruple KK, sextuple KK or 16KK.....                                                      | 14 |
| Figure 5 - Summary ROC Plot of CCA1 cassette vs single KK, double KK, quadruple KK, sextuple KK or 16KK.....                                                 | 15 |
| Figure 6 - Forest plot of CCA1 cassette vs single, duplicate KK, quadruple KK, sextuple KK and 16KK.....                                                     | 16 |
| Figure 7 - Summary ROC Plot of CCA1 cassette vs single, duplicate KK, quadruple KK, sextuple KK and 16KK.....                                                | 17 |
| Figure 8 - Forest plot of CCA1 cassette vs Urine Microscopy, Helmintex or RT-PCR.....                                                                        | 17 |
| Figure 9 - Summary ROC Plot of CCA1 cassette vs Urine Microscopy, Helmintex or RT-PCR.....                                                                   | 18 |
| Figure 10 - Forest plot of CCA2 cassette vs duplicate KK or quadruple KK.....                                                                                | 18 |
| Figure 11 - Summary ROC Plot of CCA2 cassette vs duplicate KK or quadruple KK.....                                                                           | 19 |
| Figure 12 - Forest plot of CCA2 cassette vs duplicate KK and quadruple KK.....                                                                               | 19 |
| Figure 13 - Summary ROC Plot of CCA2 cassette vs duplicate KK and quadruple KK.....                                                                          | 20 |
| Figure 14 - Forest plot of CAA cassette vs duplicate KK or quadruple KK.....                                                                                 | 20 |
| Figure 15 - Summary ROC Plot of CAA cassette vs duplicate KK or quadruple KK.....                                                                            | 21 |
| Figure 16 - Forest plot of CAA cassette vs duplicate KK and quadruple KK.....                                                                                | 21 |
| Figure 17 - Summary ROC Plot of CAA cassette vs duplicate KK and quadruple KK.....                                                                           | 22 |
| Figure 18 - Forest plot of CAA cassette vs Urine Microscopy.....                                                                                             | 22 |
| Figure 19 - Summary ROC Plot of CAA cassette vs Urine Microscopy.....                                                                                        | 23 |
| Figure 20 - Forest plot of FLOTAC (fresh), FLOTAC (10 days) or FLOTAC (30 days) vs triplicate KK.....                                                        | 23 |
| Figure 21 - Summary ROC Plot of FLOTAC (fresh), FLOTAC (10 days) or FLOTAC (30 days) vs triplicate KK.....                                                   | 24 |
| Figure 22 - Forest plot of FLOTAC (fresh), FLOTAC (10 days) or FLOTAC (30 days) vs triplicate KK.....                                                        | 24 |
| Figure 23 - Summary ROC Plot of FLOTAC (fresh), FLOTAC (10 days) and FLOTAC (30 days) vs triplicate KK.....                                                  | 25 |
| Figure 24 - Forest plot of SmCTF-RDT vs quadruple KK or Urine Microscopy.....                                                                                | 25 |
| Figure 25 - Summary ROC Plot of SmCTF-RDT vs quadruple KK or Urine Microscopy.....                                                                           | 26 |
| Figure 26 - Forest plot of Sm DNA PCR vs duplicate KK.....                                                                                                   | 26 |
| Figure 27 - Summary ROC Plot of Sm DNA PCR vs duplicate KK.....                                                                                              | 27 |
| Figure 28 - Forest plot of SWAP ELISA vs Sextuple KK, IgM ELISA or IgG ELISA vs triplicate KK.....                                                           | 27 |
| Figure 29 - Summary ROC Plot of SWAP ELISA vs Sextuple KK, IgM ELISA or IgG ELISA vs triplicate KK.....                                                      | 28 |
| Figure 30 - Forest plot of Anti IGg RDT-Sh vs Urine Microscopy.....                                                                                          | 28 |
| Figure 31 - Summary ROC Plot of Anti IGg RDT-Sh vs Urine Microscopy.....                                                                                     | 29 |
| Figure 32 - Forest plot of Proteinuria (R strip) vs Urine Microscopy.....                                                                                    | 30 |
| Figure 33 - Summary ROC Plot of Proteinuria (R strip) vs Urine Microscopy.....                                                                               | 31 |
| Figure 34 - Forest plot of Haematuria (R strip) vs Urine Microscop.....                                                                                      | 31 |

|                                                                                       |    |
|---------------------------------------------------------------------------------------|----|
| Figure 35 - Summary ROC Plot of Haematuria (R strip) vs Urine Microscopy.....         | 32 |
| Figure 36 - Forest plot of AWE-SEA ELISA vs quadruple KK.....                         | 32 |
| Figure 37 - Summary ROC Plot of AWE-SEA ELISA vs quadruple KK.....                    | 33 |
| Figure 38 - Forest plot of LAMP vs triplicate KK or Urine Microscopy.....             | 33 |
| Figure 39 - Summary ROC Plot of LAMP vs triplicate KK or Urine Microscopy.....        | 34 |
| Figure 40 - Forest plot of IHA vs triplicate KK or Urine Microscopy.....              | 34 |
| Figure 41 - Summary ROC Plot of IHA vs triplicate KK or Urine Microscopy.....         | 35 |
| Figure 42 - Forest plot of Colorimetric test vs Urine Microscopy.....                 | 35 |
| Figure 43 - Summary ROC Plot of Colorimetric test vs Urine Microscopy.....            | 36 |
| Figure 44 - Forest plot of rSP13 ELISA vs 27KK.....                                   | 36 |
| Figure 45 - Summary ROC Plot of rSP13 ELISA vs 27KK.....                              | 37 |
| Figure 46 - Forest plot of IgG SEA-ELISA vs Urine Microscopy.....                     | 37 |
| Figure 47 - Summary ROC Plot of IgG SEA-ELISA vs Urine Microscopy.....                | 38 |
| Figure 48 - Forest plot of Leukocyturia (reagent strip) vs Urine Microscopy.....      | 38 |
| Figure 49 - Summary ROC Plot of Leukocyturia (reagent strip) vs Urine Microscopy..... | 39 |
| Figure 50 - Forest plot of COPT vs duplicate KK.....                                  | 39 |
| Figure 51 - Summary ROC Plot of COPT vs duplicate KK.....                             | 40 |
| Figure 52 - Forest plot of PCR vs KK.....                                             | 40 |
| Figure 53 - Summary ROC Plot of PCR vs KK.....                                        | 41 |
| Figure 54 - Forest plot of Helmintex vs duplicate KK or RT-PCR.....                   | 41 |
| Figure 55 - Summary ROC Plot of Helmintex vs duplicate KK or RT-PCR.....              | 42 |
| Figure 56 - Forest plot of DDIA vs Urine Microscopy.....                              | 42 |
| Figure 57 - Summary ROC Plot of DDIA vs Urine Microscopy.....                         | 43 |
| Figure 58 - Forest plot of RT-PCR vs duplicate or sextuple KK.....                    | 43 |
| Figure 59 - Summary ROC Plot of RT-PCR vs duplicate or sextuple KK.....               | 44 |

## Tables

|                                                                                                                          |    |
|--------------------------------------------------------------------------------------------------------------------------|----|
| Table 1 - Diagnostic tests.....                                                                                          | 3  |
| Table 2 - Theoretical sensitivity of diagnostic tests.....                                                               | 3  |
| Table 3 - Schistosomiasis infection prevalences.....                                                                     | 8  |
| Table 4 - Output parameters of the bayesian bivariate random effects model for each diagnostic test.....                 | 45 |
| Table 5 - Sensitivities and specificities from the bayesian bivariate random effects model for each diagnostic test..... | 46 |
| Table 6 – Number of studies and number of participants for each test comparison.....                                     | 47 |

*Table 1 - Diagnostic tests*

| Test Abbreviation | Test Name                                                                                      |
|-------------------|------------------------------------------------------------------------------------------------|
| Duplicate KK      | Duplicate Kato-Katz smears                                                                     |
| Quadruple KK      | Quadruplicate Kato-Katz smears                                                                 |
| Sextuple KK       | Sextuplicate Kato-Katz smears                                                                  |
| Triplicate KK     | Triplicate Kato-Katz smears                                                                    |
| Urine Microscopy  | Urine Microscopy and microscopy                                                                |
| CCA1              | Circulating cathodic antigen urine cassette assay v1 (commercially available, cf. Adriko 2014) |
| CCA2              | Circulating cathodic antigen urine cassette assay v2 (in experimental production)              |
| CAA               | Circulating anodic antigen urine cassette assay                                                |
| FLOTAC            | FLOTAC                                                                                         |
| SmCTF-RDT         | Schistosoma mansoni cercarial transformation fluid rapid diagnostic test                       |
| Sm DNA PCR        | Schistosoma mansoni DNA detection by PCR                                                       |
| SWAP Elisa        | Soluble adult Worm Antigen Preparation (SWAP)-specific IgG ELISA                               |
| IgM Elisa         | IgM antibodies against a fraction of Schistosoma mansoni adult worm antigen (AWA)              |
| IgG Elisa         | IgG antibodies against a fraction of Schistosoma mansoni adult worm antigen (AWA)              |
| Anti IgG RDT Sh   | Anti-human IgG antibody rapid diagnostic test                                                  |
| Proteinuria       | Proteinuria reagent strips                                                                     |
| Haematuria        | Haematuria reagent strips                                                                      |
| Leukocyturia      | Leukocyturia reagent strips                                                                    |
| AWE-SEA Elisa     | S. mansoni adult worm extract (AWE) and S. mansoni soluble egg antigen (SEA) ELISA             |
| LAMP              | loop-mediated isothermal amplification (LAMP)                                                  |
| IHA               | Indirect hemagglutination assay (IHA)                                                          |
| Colorimetric Test | Macroscopic haematuria by Colorimetric Test                                                    |
| rSP13-ELISA       | recombinant proteins SjSP-13-based ELISA kit                                                   |
| Helmintex         | Isolation of eggs from fecal samples by using paramagnetic particles in a magnetic field       |
| DDIA              | Dipstick Dye Immunoassay                                                                       |
| RT-PCR            | Real-Time Polymerase Chain Reaction                                                            |

*Table 2 - Theoretical sensitivity of diagnostic tests*

| Theoretical analytic sensitivity | [Insert text]                   | [Insert text]                |
|----------------------------------|---------------------------------|------------------------------|
| Kato-Katz                        | 24 eggs per gram of stool (EPG) | Enk MJ 2008, de Vlas SJ 1992 |
| FLOTAC basic technique           | 1 EPG                           | Cringoli G 2010              |
| FLOTAC dual technique            | 2 EPG                           | Cringoli G 2010              |
| FLOTAC double technique          | 2 EPG                           | Cringoli G 2010              |
| FLOTAC pellet                    | 2 EPG                           | Cringoli G 2010              |

Figure 1 - PRISMA Flow Diagram

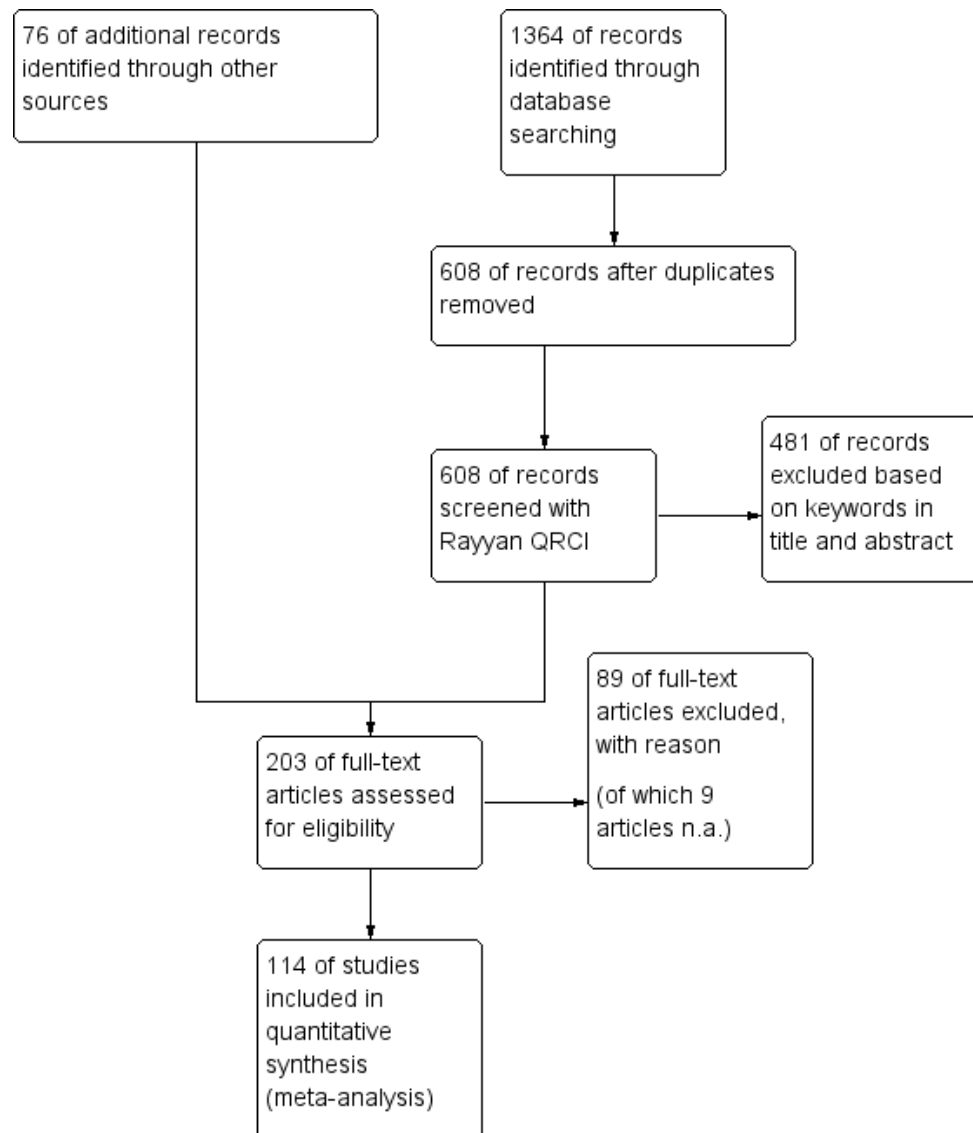

Figure 2 - Risk of bias and applicability concerns graph: review authors' judgements about each domain presented as percentages across included studies

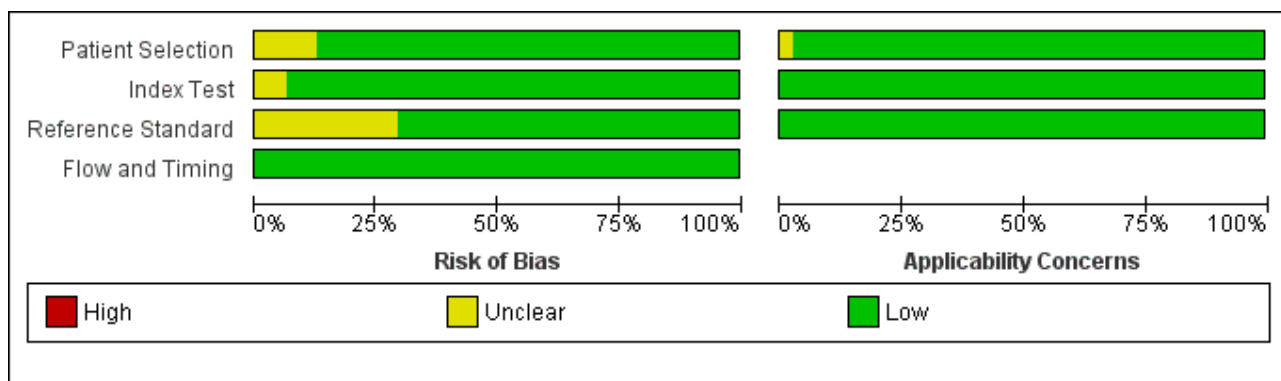



Figure 3 - Risk of bias and applicability concerns summary: review authors' judgements about each domain for each included study

|                           | Risk of Bias      |            |                    |                 | Applicability Concerns |            |                    |
|---------------------------|-------------------|------------|--------------------|-----------------|------------------------|------------|--------------------|
|                           | Patient Selection | Index Test | Reference Standard | Flow and Timing | Patient Selection      | Index Test | Reference Standard |
| Abdel-Wahab 1992          | +                 | +          | +                  | +               | +                      | +          | +                  |
| Abdel-Wahab 2000          | +                 | ?          | +                  | +               | +                      | +          | +                  |
| Adriko 2014               | +                 | +          | +                  | +               | +                      | +          | +                  |
| Al-Shehri 2018            | +                 | +          | ?                  | +               | +                      | +          | +                  |
| Al-Sherbiny 1999          | +                 | +          | +                  | +               | +                      | +          | +                  |
| Anosike 2001              | +                 | ?          | +                  | +               | +                      | +          | +                  |
| Anyan 2020                | ?                 | +          | +                  | +               | +                      | +          | +                  |
| Aryeetey 2000             | +                 | +          | ?                  | +               | +                      |            | +                  |
| Assaré 2018               | +                 | +          | +                  | +               | +                      | +          | +                  |
| Ayele 2008                | +                 | +          | ?                  | +               | +                      | +          | +                  |
| Barakat 1983              | ?                 | +          | +                  | +               | +                      | +          | +                  |
| Bassiouny 2014            | +                 | +          | ?                  | +               | +                      | +          | +                  |
| Bezerra 2020              | +                 | +          | +                  | +               | +                      | +          | +                  |
| Birrie 1995 (HPA)         | +                 | +          | +                  | +               | +                      | +          | +                  |
| Birrie 1995 (LPA)         | +                 | +          | +                  | +               | +                      | +          | +                  |
| Birrie 1995 (MPA)         | +                 | +          | +                  | +               | +                      | +          | +                  |
| Bocanegra 2015            | ?                 | +          | +                  | +               | +                      | +          | +                  |
| Bogoch 2012               | ?                 | +          | +                  | +               | +                      | +          | +                  |
| Bosompem 1996             | +                 | +          | ?                  | +               | +                      | +          | +                  |
| Bosompem 2004             | +                 | +          | ?                  | +               | +                      | +          | +                  |
| Bouilhac 1981             | ?                 | +          | ?                  |                 | ?                      | +          | +                  |
| Chernet 2017              | ?                 | +          | +                  |                 | +                      | +          | +                  |
| Colley 2013 cameroon      | +                 | +          | +                  | +               | +                      | +          | +                  |
| Colley 2013 Côte d'Ivoire |                   | +          | +                  | +               |                        | +          | +                  |
| Cooppan 1987              | +                 | +          | ?                  | +               | +                      | +          | +                  |
| Coulibaly 2013            | +                 | +          | +                  | +               | +                      | +          | +                  |
| Coulibaly 2016            | +                 | ?          | +                  | +               | +                      | +          | +                  |
| Dawson 2013               | +                 | ?          | +                  | +               | +                      | +          | +                  |
| De Clercq 1995            | +                 | +          | ?                  | +               | +                      | +          | +                  |
| De Oliveira 2005          |                   | ?          | +                  | +               |                        | +          | +                  |
| Elbasheir 2020            | +                 | +          | +                  | +               | +                      | +          | +                  |
| El-Morshedy 1996          | ?                 | +          | +                  | +               | +                      | +          | +                  |
| El-Sayed 1995             | +                 | +          | +                  | +               | +                      | +          | +                  |
| Eltiro 1992               | +                 | +          | +                  | +               | +                      | +          | +                  |
| Eltoum 1992               | +                 | +          | ?                  | +               | +                      | +          | +                  |

|                     |   |   |   |   |   |   |   |
|---------------------|---|---|---|---|---|---|---|
| Espirito-Santo 2015 | + | + | + | + | + | + | + |
| Fatiregun 2005      | + | + | ? | + | + | + | + |
| Fereira 2017        | + | + | + | + |   | + | + |
| French 2007         | + | + | ? | + | + | + | + |
| Fuss 2018           | + | + | + | + | + | + | + |
| Gabr 2000           | + | + | + | + | + | + | + |
| Gandasegui 2015     | ? | ? | + | + | ? | + | + |
| Gandasegui 2018     | + | + | + | + | + | + | + |
| Glintz 2010         | + | + | + | + | + | + | + |
| Gundersen 1996      | + | + | ? | + | + | + | + |
| Hammad 1997         | + | + | ? | + | + | + | + |
| Hamam 2000a         | + | + | + | + | + | + | + |
| Hamam 2000b         | + | + | + | + | + | + | + |
| Kassim 1989         | + | + | + | + | + | + | + |
| Kiliku 1991         | ? | + | ? | + | + | + | + |
| King 1988a          | + | + | + | + | + | + | + |
| King 1988b          | + | + | + | + | + | + | + |
| Kitange 1993        | ? | + | + | + | + | + | + |
| Knopp 2015          | + | + | + | + | + | + | + |
| Knopp 2018          | + | + | + | + |   | + | + |
| Kosinski 2011       | + | + | + | + | + | + | + |
| Lamberton 2014      | + | + | + | + | + | + | + |
| Legesse 2008        | + | + | ? | + | + | + | + |
| Lengeler 1993       | + | + | ? | + | + | + | + |
| Lindholz 2018       | + | + | + | + | + | + | + |
| Lodh 2013           | + | + | + | + | + | + | + |
| Mafe 1997           | + | + | ? | + | + | + | + |
| Mafe 2000           | + | + | + | + | + | + | + |
| Magalhaes 2020      | + | + | ? | + | + | + | + |
| Magnussen 2001      | + | + | ? | + | + | + | + |
| Mazigo 2018         | + | + | + | + | + | + | + |
| Midzi 2009          | + | + | + | + | + | + | + |
| Morenikeji 2014     | + | + | + | + | + | + | + |
| Mott 1985 Ghana     | + | + | ? | + | + | + | + |
| Mott 1985 Zambia    | + | + | ? | + | + | + | + |
| Mtasiwa 1996        | + | + | + | + | + | + | + |
| Murare 1987         | + | + | + | + | + | + | + |
| Mwangi 2018         | ? | + | + | + | + | + | + |
| N'Goran 1989        | + | + | + | + | + | + | + |
| Nausch 2014         | + | + | + | + | + | + | + |
| Navaratnam 2012     | + | + | + | + | + | + | + |
| Ndamukong 2001      | + | + | ? | + | + | + | + |
| Ndhlovu 1996        | ? | + | + | + | + | + | + |
| Nduka 1995          | + | + | + | + | + | + | + |
| Ndyomugenyi 2001    | + | + | ? | + | + | + | + |

|                              |   |   |   |   |   |   |   |   |
|------------------------------|---|---|---|---|---|---|---|---|
| Ng'andu 1988                 | + | ? | + | + | + | + | + | + |
| Ngasala 2020 Mta Dam area    | + | + | + | + | + | + | + | + |
| Ngasala 2020 Uwandani Shehia | + | + | + | + | + | + | + | + |
| Nwaorgu 1992                 | + | ? | ? | + | + | + | + | + |
| Ofori 1986                   | + | + | + | + | + | + | + | + |
| Okeke 2014 (LPA)             | + | + | ? | + | + | + | + | + |
| Okeke 2014 (MPA)             | + | + | ? | + | + | + | + | + |
| Onayade 1996                 | + | + | + | + | + | + | + | + |
| Poggensee 2000 (HPA)         | ? | + | + | + | + | + | + | + |
| Poggensee 2000 (LPA)         | ? | + | + | + | + | + | + | + |
| Polman 1995                  | + | + | + | + | + | + | + | + |
| Pugh 1980                    | + | + | + | + | + | + | + | + |
| Rasendramino 1998            | + | + | + | + | + | + | + | + |
| Robinson 2009                | + | + | ? | + | + | + | + | + |
| Rollinson 2005               | + | + | ? | + | + | + | + | + |
| Sarda 1986                   | + | + | + | + | + | + | + | + |
| Savioli 1990                 | + | + | + | + | + | + | + | + |
| Sellin 1982                  | + | + | + | + | + | + | + | + |
| Shane 2011                   | + | + | + | + | + | + | + | + |
| Shaw 1998                    | + | + | ? | + | + | + | + | + |
| Sheele 2013                  | + | + | + | + | + | + | + | + |
| Song 2018                    | + | + | + | + | + | + | + | + |
| Sousa 2020                   | + | + | + | + | + | + | + | + |
| Standley 2010                | + | + | + | + | + | + | + | + |
| Stephenson 1984              | + | + | + | + | + | + | + | + |
| Stothard 2009a               | + | + | ? | + | + | + | + | + |
| Stothard 2009b               | + | + | ? | + | + | + | + | + |
| Tanner 1983 (Liberia)        | + | + | + | + | + | + | + | + |
| Tanner 1983 (Tanzania)       | + | + | + | + | + | + | + | + |
| Tchuem Tchuente 2012         | + | + | + | + | + | + | + | + |
| Traore 1998                  | + | + | + | + | + | + | + | + |
| Uga 1989                     | ? | + | + | + | ? | + | + | + |
| Ugbomoiko 2009a              | + | + | ? | + | + | + | + | + |
| Ugbomoiko 2009b              | + | + | ? | + | + | + | + | + |
| Van Lieshout 1995            | + | + | + | + | + | + | + | + |
| Verlé 1994                   | + | + | + | + | + | + | + | + |
| Vonghachack 2017             | + | + | + | + | + | + | + | + |
| Wilkins 1979                 | + | + | ? | + | + | + | + | + |
| Xu 2014                      | + | + | + |   | + | + | + | + |
| Xu 2015                      | + | + | + | + | + | + | + | + |
| Zhang 2020                   | + | + | + | + | + | + | + | + |
| Zumstein 1983                | + | + | ? | + | + | + | + | + |

 High
  Unclear
  Low

*Table 3 - Schistosomiasis infection prevalences*

| Study                                | country                           | Population             | Prevalence<br>(ref. test) | [95% CI]      | Prevalence<br>(Index test)                          | (95% CI                                                            |
|--------------------------------------|-----------------------------------|------------------------|---------------------------|---------------|-----------------------------------------------------|--------------------------------------------------------------------|
| <a href="#">Abdel-Wahab 1992</a>     | Egypt                             |                        | 0.336                     |               | Haem.: 0.4313<br>Protein.: 0.1493<br>Leuko.: 0,1564 |                                                                    |
| <a href="#">Abdel-Wahab 2000</a>     | Egypt                             |                        | 0.137                     |               | Haem.: 0.3<br>Protein.: 0.035                       |                                                                    |
| <a href="#">Adriko 2014</a>          | Uganda                            |                        | 0.250                     |               | 0.626                                               |                                                                    |
| <a href="#">Al-Shehri 2018</a>       | Uganda                            |                        | 0.567                     | [0.508;0.63]  | KK: 0.441<br>SEA-EL: 0.751<br>PCR: 0.674            | KK: [0.38;0.502]<br>SEA-EL:<br>[0.698;0.804]<br>PCR: [0.616;0.731] |
| <a href="#">Al-Sherbiny 1999</a>     | Nigeria                           |                        | 0.158                     |               |                                                     |                                                                    |
| <a href="#">Anosike 2001</a>         | Nigeria                           |                        | 0.499                     |               | 0.295                                               |                                                                    |
| <a href="#">Anyan 2020</a>           | Ghana                             |                        |                           |               | S. haem. :<br>0.485<br>S. mans: 0.466               | [0.41;0.56]<br>[0.39;0.54]                                         |
| <a href="#">Aryeetey 2000</a>        | Ghana                             |                        |                           |               | Haem.:                                              |                                                                    |
| <a href="#">Assaré 2018</a>          | Côte d'Ivoire                     |                        | 0.066                     | [0.047;0.084] | 0.33                                                | [0.295;0.366]                                                      |
| <a href="#">Ayele 2008</a>           |                                   |                        | 0.48                      |               | 0.432                                               |                                                                    |
| <a href="#">Barakat 1983</a>         | Egypt                             |                        | 0,3787                    |               | 0,3984                                              |                                                                    |
| <a href="#">Bassiouny 2014</a>       | Yemen                             |                        | 0.181                     |               | 0.161                                               |                                                                    |
| <a href="#">Bezerra 2020</a>         | Brazil                            |                        | 0.4882                    |               | 0.4488                                              |                                                                    |
| <a href="#">Birrie 1995 (HPA)</a>    | Ethiopia                          |                        | 0.305                     |               | 0.36                                                |                                                                    |
| <a href="#">Birrie 1995 (LPA)</a>    | Ethiopia                          |                        | 0.032                     |               | 0.045                                               |                                                                    |
| <a href="#">Birrie 1995 (MPA)</a>    | Ethiopia                          |                        | 0.21                      |               | 0.308                                               |                                                                    |
| <a href="#">Bocanegra 2015</a>       | Central Angola                    |                        | 0.6118                    |               | 0.657                                               |                                                                    |
| <a href="#">Bogoch 2012</a>          | Northern Ghana                    |                        | 0.068                     |               |                                                     |                                                                    |
| <a href="#">Bosompem 1996</a>        | Ghana                             |                        | 0.476                     |               | Haem.: 0.397<br>Protein.: 0.236                     |                                                                    |
| <a href="#">Bosompem 2004</a>        | Ghana                             |                        | 0.603                     |               | Haem.: 0.27<br>Protein.: 0.305                      |                                                                    |
| <a href="#">Bouilhac 1981</a>        |                                   |                        | 0.3506                    |               | 0.3052                                              |                                                                    |
| <a href="#">Chernet 2017</a>         | Las Palmas de Gran Canaria, Spain | sub saharan immigrants | 0.4148                    |               |                                                     |                                                                    |
| <a href="#">Colley 2013 cameroon</a> | Cameroon                          |                        | 0.384                     |               | 0.622                                               |                                                                    |
| <a href="#">Colley 2013 Côte</a>     | Côte d'Ivoire                     |                        | 0.479                     |               | 0.455                                               |                                                                    |

|                                     |                     |  |                      |                            |                                                                                                                          |                                        |
|-------------------------------------|---------------------|--|----------------------|----------------------------|--------------------------------------------------------------------------------------------------------------------------|----------------------------------------|
| <a href="#">d'ivoire</a>            |                     |  |                      |                            |                                                                                                                          |                                        |
| <a href="#">Cooppan 1987</a>        | South Africa        |  | 0.809                |                            | Haem.: 0.697<br>Protein.: 0,774                                                                                          |                                        |
| <a href="#">Coulibaly 2013</a>      | South Côte d'Ivoire |  | 0.212                | [0.144;0.299]              | 0.669                                                                                                                    | [0.576;0.752]                          |
| <a href="#">Coulibaly 2016</a>      | Côte d'Ivoire       |  | 0.933                | [0.892;0.973]              | 0.953                                                                                                                    | [0.919;0.987]                          |
| <a href="#">Dawson 2013</a>         | Uganda              |  | <3y: 0.3<br>>3y: 0.6 | [0.18;0.47]<br>[0.45;0.65] | (CCA) 0.5<br>0.78                                                                                                        | [0.32;0.62]<br>[0.6;0.9]               |
| <a href="#">De Clercq 1995</a>      | Mali                |  | 0,576                |                            | 0,6372                                                                                                                   |                                        |
| <a href="#">De Oliveira 2005</a>    | Brazil              |  | 0.3649               |                            |                                                                                                                          |                                        |
| <a href="#">Elbasheir 2020</a>      | Sudan               |  | 0.358                |                            | 0.438                                                                                                                    |                                        |
| <a href="#">El-Morshedy 1996</a>    | Egypt               |  | 0.57                 |                            | 0.455                                                                                                                    |                                        |
| <a href="#">El-Sayed 1995</a>       | Egypt               |  | 0.033                |                            | 0.29                                                                                                                     |                                        |
| <a href="#">El tiro 1992</a>        | Ethiopia            |  | 0.8350               |                            | 0.9300                                                                                                                   |                                        |
| <a href="#">Eltoum 1992</a>         | Sudan               |  | 0.42                 |                            | 0.62                                                                                                                     |                                        |
| <a href="#">Espirito-Santo 2015</a> | Brazil              |  | 0.008                |                            | ELISA-IgG:<br>0.116<br>ELISA-IgM:<br>0.214<br>COPT: 0.54<br>ITF-IgM: 0.158<br>qPCR-feces:<br>0.98<br>qPCR-serum:<br>0.15 |                                        |
| <a href="#">Fatiregun 2005</a>      | Nigeria             |  | 0.122                |                            | 0.166                                                                                                                    |                                        |
| <a href="#">Ferreira 2017</a>       | Brazil              |  | 0.08                 |                            | 0.273                                                                                                                    |                                        |
| <a href="#">French 2007</a>         | Tanzania            |  | 0.1314               |                            |                                                                                                                          |                                        |
| <a href="#">Fuss 2018</a>           | Tanzania            |  | 0.852                | [0.812;0.892]              | PCR: 0.929<br>CCA: 0.949                                                                                                 | PCR: [0.9;0.958]<br>CCA: [0.924;0.974] |
| <a href="#">Gabr 2000</a>           | Egypt               |  | 0.089                | [0.081;0.097]              | Haem.: 0.219<br>Protein.: 0.0455                                                                                         |                                        |
| <a href="#">Gandasegui 2015</a>     | Spain               |  |                      |                            |                                                                                                                          |                                        |
| <a href="#">Gandasegui 2018</a>     | Angola              |  | 0.506                |                            | microhaem.:<br>0.483<br>LAMP: 0.738                                                                                      |                                        |
| <a href="#">Glantz 2010</a>         | South Côte d'Ivoire |  | 0.643                |                            | 0.536                                                                                                                    |                                        |
| <a href="#">Gundersen 1996</a>      | Malawi              |  | 0.1962               |                            | Haem.: 0.8<br>Protein.: 0.7923<br>Leuk.: 0.7577                                                                          |                                        |
| <a href="#">Hammad 1997</a>         | Egypt               |  |                      |                            |                                                                                                                          |                                        |
| <a href="#">Hammam 2000a</a>        | Egypt               |  | 0.048                | [0.041;0.055]              | Haem.: 0.238<br>Protein.: 0.119                                                                                          |                                        |

|                                  |          |  |                           |               |                                                                  |             |
|----------------------------------|----------|--|---------------------------|---------------|------------------------------------------------------------------|-------------|
| <a href="#">Hammam 2000b</a>     | Egypt    |  | 0.052                     | [0.047;0.057] | Haem.: 0.179<br>Protein.: 0.008                                  |             |
| <a href="#">Kassim 1989</a>      | Nigeria  |  | 0,1302                    |               | Haem.: 0,1193<br>Protein.: 0,2104                                |             |
| <a href="#">Kiliku 1991</a>      | Kenya    |  | 0.5939                    |               | Haem.: 0.4061<br>Protein.: 0.6197                                |             |
| <a href="#">King 1988a</a>       | Kenya    |  | 0.69                      |               | Haem.: 0.54<br>Protein.: 0.56                                    |             |
| <a href="#">King 1988b</a>       | Kenya    |  | 0.65                      |               | 0,3709                                                           |             |
| <a href="#">Kitange 1993</a>     | Tanzania |  | 0.3281                    |               | Haem.: 0.3834<br>Protein.: 0.1225                                |             |
| <a href="#">Knopp 2015</a>       | Tanzania |  | 0,0475                    |               | 0.0408                                                           |             |
| <a href="#">Knopp 2018</a>       | Zanzibar |  | 0.0451                    |               | 0.0786                                                           |             |
| <a href="#">Kosinski 2011</a>    | Ghana    |  | Girls=0.204<br>Boys=0.316 |               |                                                                  |             |
| <a href="#">Lamberton 2014</a>   | Uganda   |  | 0.9474                    | [0.872;0.979] | 0.8816                                                           |             |
| <a href="#">Legesse 2008</a>     | Ethiopia |  | 0.364                     |               | 0.652                                                            |             |
| <a href="#">Lengeler 1993</a>    | Tanzania |  | 0.223                     |               | 0.331                                                            |             |
| <a href="#">Lindholz 2018</a>    | Brazil   |  | 0.119                     |               | HTX: 0.406<br>CCA: 0.716                                         |             |
| <a href="#">Lodh 2013</a>        | Zambia   |  | 0.51                      |               | 0.6                                                              |             |
| <a href="#">Mafe 1997</a>        | Nigeria  |  | 0.574                     |               | 0.48                                                             |             |
| <a href="#">Mafe 2000</a>        | Tanzania |  | 0.325                     |               | 0.369                                                            |             |
| <a href="#">Magalhaes 2020</a>   | Brazil   |  | 0.55                      |               | 2KK: 0.199<br>6KK: 0.37<br>Helm.: 0.40<br>CCA: 0.48              |             |
| <a href="#">Magnussen 2001</a>   | Tanzania |  |                           |               | 0.30                                                             |             |
| <a href="#">Mazigo 2018</a>      | Tanzania |  | 0.578                     | [0.529;0.624] | 0.874                                                            | [0.835;0.9] |
| <a href="#">Midzi 2009</a>       | Zimbabwe |  | 0.40                      |               | 0.65                                                             |             |
| <a href="#">Morenikeji 2014</a>  | Nigeria  |  | 0.571                     |               | Macroheam.:<br>0.164<br>Microhaem.: 0.5<br>Proteinuria:<br>0.655 |             |
| <a href="#">Mott 1985 Ghana</a>  | Ghana    |  | 0,6904                    |               | Haem.: 0,5107<br>Protein.: 0,8359                                |             |
| <a href="#">Mott 1985 Zambia</a> | Zambia   |  | 0,6951                    |               | Haem.: 0,596<br>Protein.: 0,6959                                 |             |
| <a href="#">Mtasiwa 1996</a>     | Tanzania |  | 0.6757                    |               | 0.6708                                                           |             |
| <a href="#">Murare 1987</a>      | Zimbabwe |  | 0,6983                    |               | Haem.: 0,5948<br>Protein.: 0,7112                                |             |

|                                              |             |  |                                           |                                      |                                                                |                                                                                              |
|----------------------------------------------|-------------|--|-------------------------------------------|--------------------------------------|----------------------------------------------------------------|----------------------------------------------------------------------------------------------|
| <a href="#">Mwangi 2018</a>                  | Kenya       |  | 0,4595                                    |                                      | 0,4465                                                         |                                                                                              |
| <a href="#">N'Goran 1989</a>                 | Ivory Coast |  | 0.3278                                    |                                      | 0.4963                                                         |                                                                                              |
| <a href="#">Nausch 2014</a>                  | Zimbabwe    |  | Sh>50%,<br>Sm<20%<br>Sh=0.528,<br>Sm=0.11 | Sh=[0.420;0.633]<br>Sm=[0.054;0.193] | 0.8351                                                         |                                                                                              |
| <a href="#">Navaratnam 2012</a>              | Uganda      |  | 0.322                                     | [0.283;0.362]                        | 0.4                                                            | [0.358;0.44]                                                                                 |
| <a href="#">Ndamukong 2001</a>               | Cameroon    |  | 0.536                                     |                                      | Haem.: 0.498<br>Protein.: 0.495                                |                                                                                              |
| <a href="#">Ndhlovu 1996</a>                 | Zimbabwe    |  | 0.5363                                    |                                      | 0.8715                                                         |                                                                                              |
| <a href="#">Nduka 1995</a>                   | Nigeria     |  | 0.2103                                    |                                      | 0.0352                                                         |                                                                                              |
| <a href="#">Ndyomugenyi 2001</a>             | Tanzania    |  | 0.476                                     |                                      | 0.522                                                          |                                                                                              |
| <a href="#">Ng'andu 1988</a>                 | Zambia      |  | 0,4102                                    |                                      | Haem.: 0,4199<br>Protein.: 0,3592                              |                                                                                              |
| <a href="#">Ngasala 2020 Mta Dam area</a>    | Tanzania    |  | 0.068                                     | [0.046;0.099]                        | 0.515                                                          |                                                                                              |
| <a href="#">Ngasala 2020 Uwandani Shehia</a> | Tanzania    |  | 0.387                                     | [0.312;0.468]                        | 0.452                                                          |                                                                                              |
| <a href="#">Nwaorgu 1992</a>                 | Nigeria     |  | 0.57                                      |                                      |                                                                |                                                                                              |
| <a href="#">Ofori 1986</a>                   | Ghana       |  | 0,5424                                    |                                      | Haem.: 0,3814<br>Protein.: 0,4661                              |                                                                                              |
| <a href="#">Okeke 2014 (LPA)</a>             | Nigeria     |  | 0.051                                     | [0.0259;0.0761]                      | Micro-haem.: 0.064<br>Macro-haem.: 0.002<br>Proteinuria: 0.243 | Micro-haem.: [0.0361;0.0919]<br>Macro-haem.: [0.0041;0.0359]<br>Proteinuria: [0.1941;0.2919] |
| <a href="#">Okeke 2014 (MPA)</a>             | Nigeria     |  | 0.266                                     | [0.2022;0.3298]                      | Micro-haem.: 0.207<br>Macro-haem.: 0.043<br>Proteinuria: 0.179 | Micro-haem.: [0.1485;0.2655]<br>Macro-haem.: [0.0137;0.0723]<br>Proteinuria: [0.1485;0.2655] |
| <a href="#">Onayade 1996</a>                 | Nigeria     |  | 0.8857                                    |                                      | 0.5413                                                         |                                                                                              |
| <a href="#">Poggensee 2000 (HPA)</a>         | Tanzania    |  | 0.53                                      |                                      | Haem.: 0.547<br>Protein.: 0.109<br>Leuk.: 0.547                |                                                                                              |
| <a href="#">Poggensee 2000 (LPA)</a>         | Tanzania    |  | 0.04                                      |                                      | Haem.: 0.0297<br>Protein.: 0.086<br>Leuk.: 0.55                |                                                                                              |
| <a href="#">Polman 1995</a>                  | Senegal     |  | 0.91                                      |                                      | s-CAA: 0.94<br>u-CCA: 0.95                                     |                                                                                              |



|                                        |                  |  |                                                       |                                |                                                     |                                              |
|----------------------------------------|------------------|--|-------------------------------------------------------|--------------------------------|-----------------------------------------------------|----------------------------------------------|
|                                        |                  |  |                                                       |                                | s-CCA: 0.83                                         |                                              |
| <a href="#">Pugh 1980</a>              | Nigeria          |  | 0,1733                                                |                                | Haem.: 0,1601<br>Protein.: 0,2599                   |                                              |
| <a href="#">Rasendramino 1998</a>      | Madagascar       |  | 0.7678                                                |                                | Haem.: 0.7020<br>Protein.: 0.6143<br>Leuko.: 0.4899 |                                              |
| <a href="#">Robinson 2009</a>          | Southern Sudan   |  | 0.03                                                  | [0.025;0.036]                  | 0.075                                               |                                              |
| <a href="#">Rollinson 2005</a>         | Tanzania         |  | 0,5393                                                |                                | 0,5036                                              |                                              |
| <a href="#">Sarda 1986</a>             | Tanzania         |  | 0.2523                                                |                                | Haem.: 0.2531<br>Protein.: 0.3131                   |                                              |
| <a href="#">Savioli 1990</a>           | Tanzania         |  | 0.34                                                  |                                | 0.29                                                |                                              |
| <a href="#">Sellin 1982</a>            | Burkina Faso     |  | 0,463                                                 |                                | Haem.: 0,7048<br>Protein.: 0,5189                   |                                              |
| <a href="#">Shane 2011</a>             | Kenya            |  | 0.388                                                 | [0.0.344;0.433]                | 0.624                                               | [0.576;0.670]                                |
| <a href="#">Shaw 1998</a>              | Senegal          |  | 0,3932                                                |                                | 0,3746                                              |                                              |
| <a href="#">Sheele 2013</a>            | Kenya            |  | 0.4875                                                |                                | 0.675                                               |                                              |
| <a href="#">Song 2018</a>              | Sudan            |  | 0.3893                                                |                                | 0.7987                                              |                                              |
| <a href="#">Sousa 2020</a>             | Brazil           |  | 1KK: 0.055<br>2KK: 0.078<br>16KK: 0.143<br>HTX: 0.244 |                                | 0.29                                                |                                              |
| <a href="#">Standley 2010</a>          | Kenya & Tanzania |  | 0.686                                                 | [0.607;0.757]                  | tr(-): 0.713<br>tr(+): 0.942                        | tr(-): [0.639;0.788]<br>tr(+): [0.895;0.972] |
| <a href="#">Stephenson 1984</a>        | Kenya            |  | 0.476                                                 |                                | Haem.: 0.435<br>Protein.: 0.35                      |                                              |
| <a href="#">Stothard 2009a</a>         | Tanzania         |  | 0.307                                                 | [0.234;0.387]                  | CCA: 0.04<br>SEA-EL: 0.48                           | CCA: 0.015;0.085]<br>SEA-EL:<br>0.398;0.563] |
| <a href="#">Stothard 2009b</a>         | Tanzania         |  | 0.652                                                 | [0.524;0.765]                  | 0.773                                               | [0.653;0.867]                                |
| <a href="#">Tanner 1983 (Liberia)</a>  | Liberia          |  | 0.7079                                                |                                | Haem.: 0.5206<br>Protein.: 0.4419                   |                                              |
| <a href="#">Tanner 1983 (Tanzania)</a> | Tanzania         |  | 0.2956                                                |                                | Haem.: 0.3303<br>Protein.: 0.3723                   |                                              |
| <a href="#">Tchuem Tchuente 2012</a>   | Ethiopia         |  | 0.430                                                 |                                | 0.660                                               |                                              |
| <a href="#">Traore 1998</a>            | Nigeria          |  | 0.552                                                 |                                | Haem.: 0.476<br>Protein.: 0.408                     |                                              |
| <a href="#">Uga 1989</a>               | Kenya            |  | 0.78                                                  |                                | 0.76                                                |                                              |
| <a href="#">Ugbomoiko 2009a</a>        | Nigeria          |  | 1992: 0.629<br>2006: 0.514                            | [0.588;0.670]<br>[0.488;0.540] | 0.583<br>0.465                                      | [0.542;0.624]<br>[0.429;0.491]               |
| <a href="#">Ugbomoiko 2009b</a>        | Nigeria          |  | 0.508                                                 | [0.46;0.555]                   | Microhaem.:<br>0.683                                |                                              |

|                                   |                                                    |  |                |             |                                                          |                                                                                      |
|-----------------------------------|----------------------------------------------------|--|----------------|-------------|----------------------------------------------------------|--------------------------------------------------------------------------------------|
|                                   |                                                    |  |                |             | Protein.: 0.533                                          |                                                                                      |
| <a href="#">Van Lieshout 1995</a> | Surinam                                            |  | 0.29           | [0.23;0.34] | s-CAA: 0.23<br>u-CAA: 0.03<br>s-CCA: 0.17<br>u-CCA: 0.28 | s-CAA: [0.19;0.28]<br>u-CAA: [0.01;0.04]<br>s-CCA: [0.13;0.21]<br>u-CCA: [0.23;0.33] |
| <a href="#">Verlé 1994</a>        | Senegal                                            |  | 0,8693         |             | Haem.: 0,625<br>Protein.: 0,5369                         |                                                                                      |
| <a href="#">Vonghachack 2017</a>  | Lao People's<br>Democratic<br>Republic<br>Cambodia |  | 0.127<br>0.005 |             | 0.238<br>0.184                                           |                                                                                      |
| <a href="#">Wilkins 1979</a>      | Gambia                                             |  | 0,5545         |             | Haem.: 0,3498<br>Protein.: 0,4897                        |                                                                                      |
| <a href="#">Xu 2014</a>           | China                                              |  | 0.05           |             | 0.339                                                    |                                                                                      |
| <a href="#">Xu 2015</a>           | China                                              |  |                |             | ELISA: 0.845<br>IHA: 0.918<br>LAMP: 0.945                |                                                                                      |
| <a href="#">Zhang 2020</a>        | Zambia                                             |  | 0.61           | [0.53;0.69] | DDIA: 0.51<br>IHA: 0.56                                  | DDIA: [0.43;0.59]<br>IHA: [0.48;0.64]                                                |
| <a href="#">Zumstein 1983</a>     | Tanzania                                           |  | 0.46           |             | 0.81                                                     |                                                                                      |

Figure 4 - Forest plot of CCA1 cassette vs single KK, double KK, quadruple KK, sextuple KK or 16KK

#### CCA1 cassette vs single KK

| Study      | TP | FP | FN | TN  | Sensitivity (95% CI) | Specificity (95% CI) |
|------------|----|----|----|-----|----------------------|----------------------|
| Sousa 2020 | 10 | 69 | 2  | 136 | 0.83 [0.52, 0.98]    | 0.66 [0.59, 0.73]    |

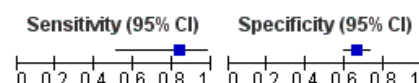

#### CCA1 cassette vs duplicate KK

| Study                | TP  | FP  | FN | TN  | Sensitivity (95% CI) | Specificity (95% CI) |
|----------------------|-----|-----|----|-----|----------------------|----------------------|
| Adriko 2014          | 6   | 42  | 2  | 49  | 0.75 [0.35, 0.97]    | 0.54 [0.43, 0.64]    |
| Al-Shehri 2018       | 113 | 34  | 1  | 110 | 0.99 [0.95, 1.00]    | 0.76 [0.69, 0.83]    |
| Elbasheir 2020       | 168 | 46  | 7  | 268 | 0.96 [0.92, 0.98]    | 0.85 [0.81, 0.89]    |
| Ferreira 2017        | 11  | 71  | 7  | 211 | 0.61 [0.36, 0.83]    | 0.75 [0.69, 0.80]    |
| Fuss 2018            | 249 | 34  | 4  | 10  | 0.98 [0.96, 1.00]    | 0.23 [0.11, 0.38]    |
| Legesse 2008         | 60  | 60  | 18 | 46  | 0.77 [0.66, 0.86]    | 0.43 [0.34, 0.53]    |
| Lindholz 2018        | 47  | 283 | 8  | 123 | 0.85 [0.73, 0.94]    | 0.30 [0.26, 0.35]    |
| Lodh 2013            | 45  | 8   | 26 | 10  | 0.63 [0.51, 0.75]    | 0.56 [0.31, 0.78]    |
| Navaratnam 2012      | 149 | 193 | 34 | 220 | 0.81 [0.75, 0.87]    | 0.53 [0.48, 0.58]    |
| Polman 1995          | 327 | 29  | 57 | 9   | 0.85 [0.81, 0.89]    | 0.24 [0.11, 0.40]    |
| Polman 1995          | 341 | 24  | 43 | 14  | 0.89 [0.85, 0.92]    | 0.37 [0.22, 0.54]    |
| Sousa 2020           | 15  | 64  | 2  | 136 | 0.88 [0.64, 0.99]    | 0.68 [0.61, 0.74]    |
| Standley 2010        | 103 | 17  | 14 | 37  | 0.88 [0.81, 0.93]    | 0.69 [0.54, 0.80]    |
| Standley 2010        | 116 | 44  | 1  | 10  | 0.99 [0.96, 1.00]    | 0.19 [0.09, 0.31]    |
| Tchuem Tchuente 2012 | 11  | 71  | 7  | 211 | 0.61 [0.36, 0.83]    | 0.75 [0.69, 0.80]    |
| Van Lieshout 1995    | 21  | 10  | 37 | 136 | 0.36 [0.24, 0.50]    | 0.93 [0.88, 0.97]    |
| Van Lieshout 1995    | 36  | 23  | 22 | 123 | 0.62 [0.48, 0.74]    | 0.84 [0.77, 0.90]    |

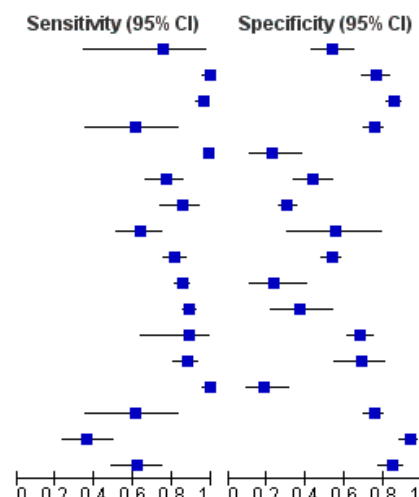

#### CCA1 cassette vs quadruple KK

| Study                          | TP  | FP  | FN | TN  | Sensitivity (95% CI) | Specificity (95% CI) |
|--------------------------------|-----|-----|----|-----|----------------------|----------------------|
| Adriko 2014                    | 8   | 40  | 3  | 49  | 0.73 [0.39, 0.94]    | 0.55 [0.44, 0.66]    |
| Chernet 2017                   | 21  | 22  | 2  | 62  | 0.91 [0.72, 0.99]    | 0.74 [0.63, 0.83]    |
| Colley 2013 cameroon           | 247 | 208 | 27 | 231 | 0.90 [0.86, 0.93]    | 0.53 [0.48, 0.57]    |
| Colley 2013 C&#244;te d'Ivoire | 278 | 42  | 38 | 249 | 0.88 [0.84, 0.91]    | 0.86 [0.81, 0.89]    |
| Coulibaly 2013                 | 18  | 43  | 6  | 49  | 0.75 [0.53, 0.90]    | 0.53 [0.43, 0.64]    |
| Dawson 2013                    | 9   | 11  | 4  | 18  | 0.69 [0.39, 0.91]    | 0.62 [0.42, 0.79]    |
| Dawson 2013                    | 23  | 8   | 1  | 8   | 0.96 [0.79, 1.00]    | 0.50 [0.25, 0.75]    |
| Ferreira 2017                  | 11  | 71  | 10 | 216 | 0.52 [0.30, 0.74]    | 0.75 [0.70, 0.80]    |
| Mazigo 2018                    | 233 | 132 | 9  | 45  | 0.96 [0.93, 0.98]    | 0.25 [0.19, 0.33]    |
| Shane 2011                     | 231 | 664 | 35 | 833 | 0.87 [0.82, 0.91]    | 0.56 [0.53, 0.58]    |
| Vonghachack 2017               | 23  | 200 | 1  | 153 | 0.96 [0.79, 1.00]    | 0.43 [0.38, 0.49]    |

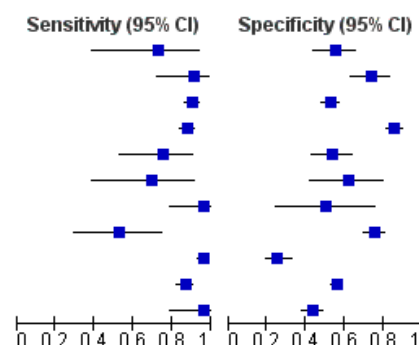

#### CCA1 cassette vs sextuple KK

| Study                | TP  | FP  | FN | TN  | Sensitivity (95% CI) | Specificity (95% CI) |
|----------------------|-----|-----|----|-----|----------------------|----------------------|
| Adriko 2014          | 10  | 38  | 3  | 47  | 0.77 [0.46, 0.95]    | 0.55 [0.44, 0.66]    |
| Assar&#233; 2018     | 38  | 187 | 7  | 449 | 0.84 [0.71, 0.94]    | 0.71 [0.67, 0.74]    |
| Bezerra 2020         | 46  | 11  | 16 | 54  | 0.74 [0.62, 0.84]    | 0.83 [0.72, 0.91]    |
| Ferreira 2017        | 10  | 72  | 8  | 224 | 0.56 [0.31, 0.78]    | 0.76 [0.70, 0.80]    |
| Lamberton 2014       | 66  | 1   | 6  | 3   | 0.92 [0.83, 0.97]    | 0.75 [0.19, 0.99]    |
| Shane 2011           | 176 | 88  | 11 | 129 | 0.94 [0.90, 0.97]    | 0.59 [0.53, 0.66]    |
| Tchuem Tchuente 2012 | 322 | 94  | 59 | 150 | 0.85 [0.80, 0.88]    | 0.61 [0.55, 0.68]    |

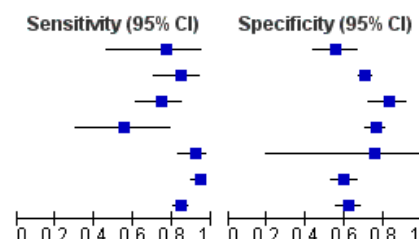

#### CCA1 cassette vs 16KK

| Study      | TP | FP | FN | TN  | Sensitivity (95% CI) | Specificity (95% CI) |
|------------|----|----|----|-----|----------------------|----------------------|
| Sousa 2020 | 25 | 54 | 6  | 132 | 0.81 [0.63, 0.93]    | 0.71 [0.64, 0.77]    |

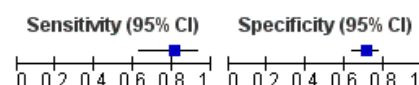

Figure 5 - Summary ROC Plot of CCA1 cassette vs single KK, double KK, quadruple KK, sextuple KK or 16KK

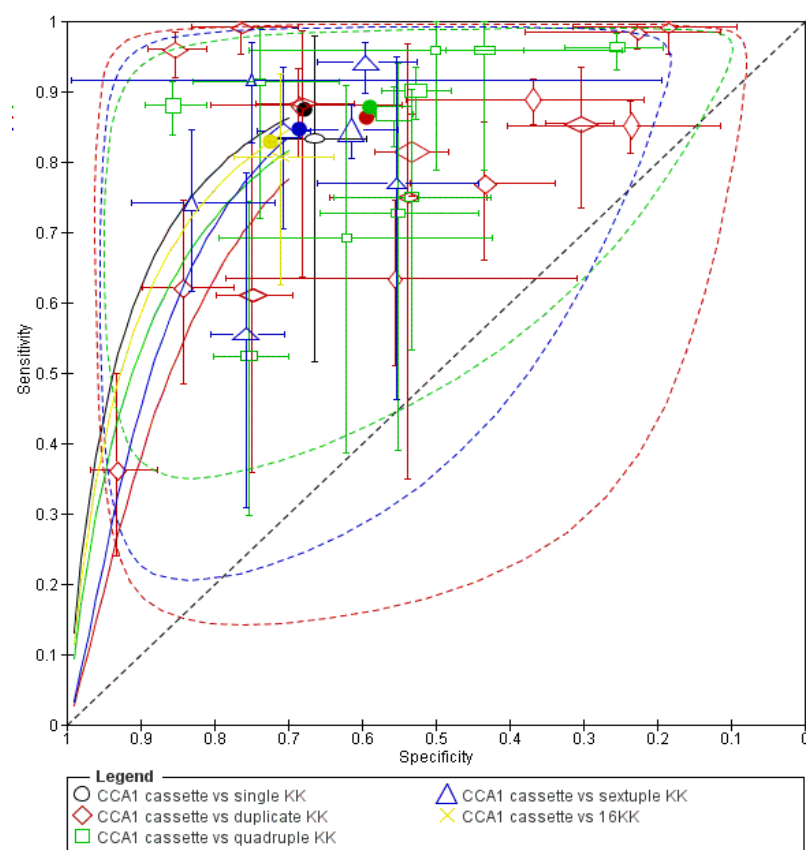

Figure 6 - Forest plot of CCA1 cassette vs single, duplicate KK, quadruple KK, sextuple KK and 16KK

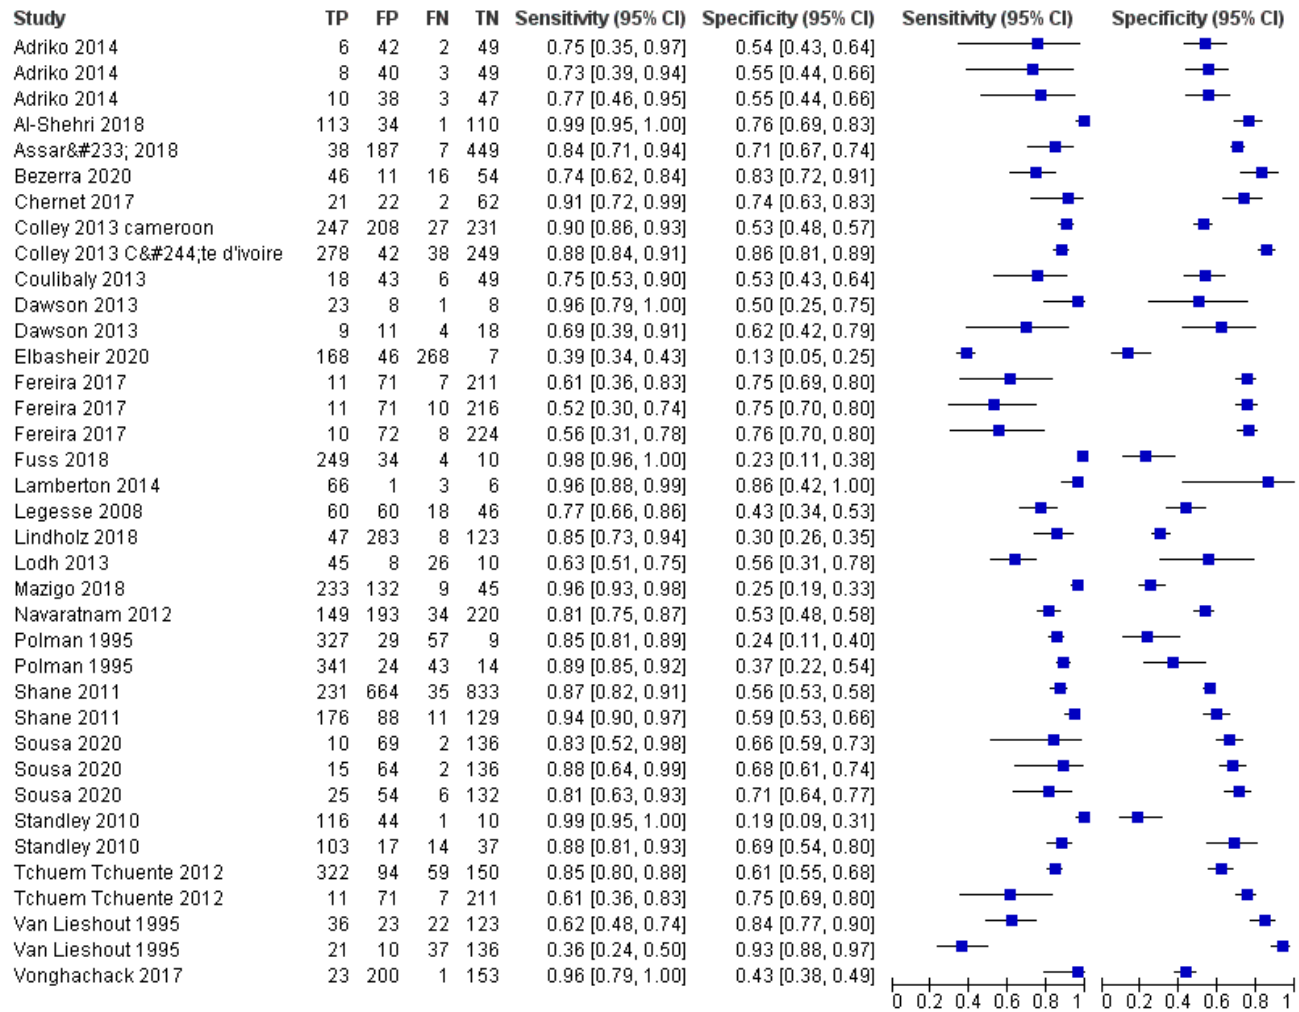

Figure 7 - Summary ROC Plot of CCA1 cassette vs single, duplicate KK, quadruple KK, sextuple KK and 16KK

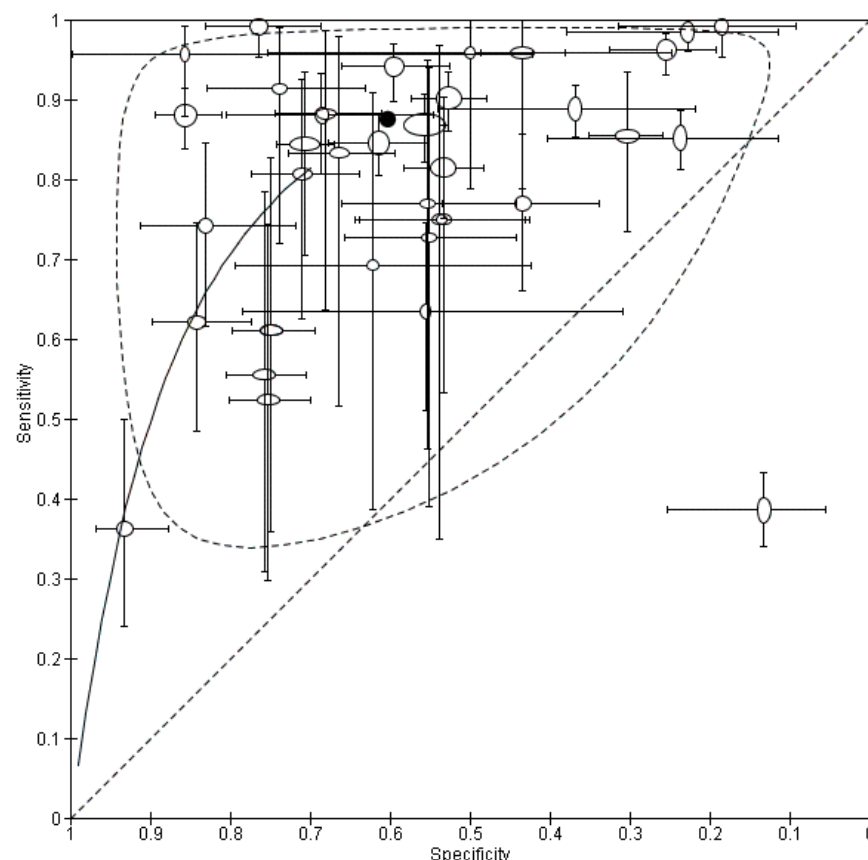

Figure 8 - Forest plot of CCA1 cassette vs Urine Microscopy, Helmintex or RT-PCR

#### CCA1 vs Urine Microscopy

| Study            | TP | FP | FN | TN  | Sensitivity (95% CI) | Specificity (95% CI) | Sensitivity (95% CI) | Specificity (95% CI) |
|------------------|----|----|----|-----|----------------------|----------------------|----------------------|----------------------|
| Al-Sherbiny 1999 | 52 | 90 | 15 | 213 | 0.78 [0.66, 0.87]    | 0.70 [0.65, 0.75]    |                      |                      |
| Ayele 2008       | 51 | 39 | 47 | 69  | 0.52 [0.42, 0.62]    | 0.64 [0.54, 0.73]    |                      |                      |
| Midzi 2009       | 84 | 88 | 23 | 70  | 0.79 [0.70, 0.86]    | 0.44 [0.36, 0.52]    |                      |                      |
| Stothard 2009a   | 4  | 2  | 42 | 102 | 0.09 [0.02, 0.21]    | 0.98 [0.93, 1.00]    |                      |                      |

#### CCA1 vs Helmintex

| Study      | TP | FP | FN | TN  | Sensitivity (95% CI) | Specificity (95% CI) | Sensitivity (95% CI) | Specificity (95% CI) |
|------------|----|----|----|-----|----------------------|----------------------|----------------------|----------------------|
| Sousa 2020 | 30 | 46 | 23 | 115 | 0.57 [0.42, 0.70]    | 0.71 [0.64, 0.78]    |                      |                      |

#### CCA1 vs RT-PCR

| Study          | TP | FP | FN | TN | Sensitivity (95% CI) | Specificity (95% CI) | Sensitivity (95% CI) | Specificity (95% CI) |
|----------------|----|----|----|----|----------------------|----------------------|----------------------|----------------------|
| Magalhaes 2020 | 70 | 24 | 38 | 64 | 0.65 [0.55, 0.74]    | 0.73 [0.62, 0.82]    |                      |                      |

Figure 9 - Summary ROC Plot of CCA1 cassette vs Urine Microscopy, Helmintex or RT-PCR

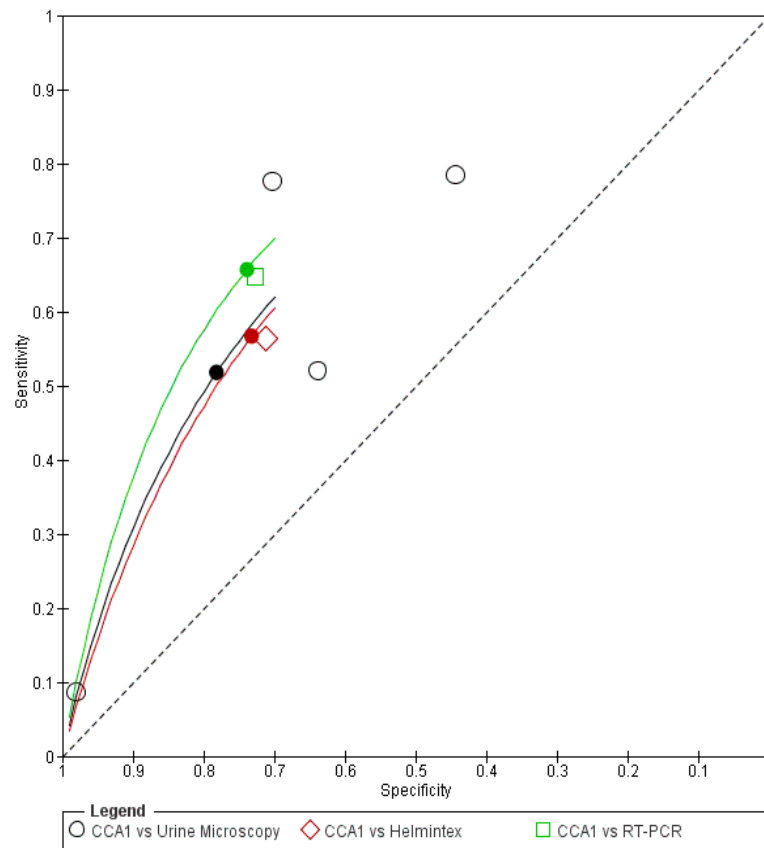

Figure 10 - Forest plot of CCA2 cassette vs duplicate KK or quadruple KK

#### CCA2 cassette vs double KK

| Study       | TP | FP | FN | TN | Sensitivity (95% CI) | Specificity (95% CI) | Sensitivity (95% CI) | Specificity (95% CI) |
|-------------|----|----|----|----|----------------------|----------------------|----------------------|----------------------|
| Adriko 2014 | 5  | 4  | 3  | 88 | 0.63 [0.24, 0.91]    | 0.96 [0.89, 0.99]    |                      |                      |

#### CCA2 cassette vs quadruple KK

| Study       | TP | FP | FN | TN | Sensitivity (95% CI) | Specificity (95% CI) | Sensitivity (95% CI) | Specificity (95% CI) |
|-------------|----|----|----|----|----------------------|----------------------|----------------------|----------------------|
| Adriko 2014 | 5  | 4  | 6  | 85 | 0.45 [0.17, 0.77]    | 0.96 [0.89, 0.99]    |                      |                      |



Figure 11 - Summary ROC Plot of CCA2 cassette vs duplicate KK or quadruple KK

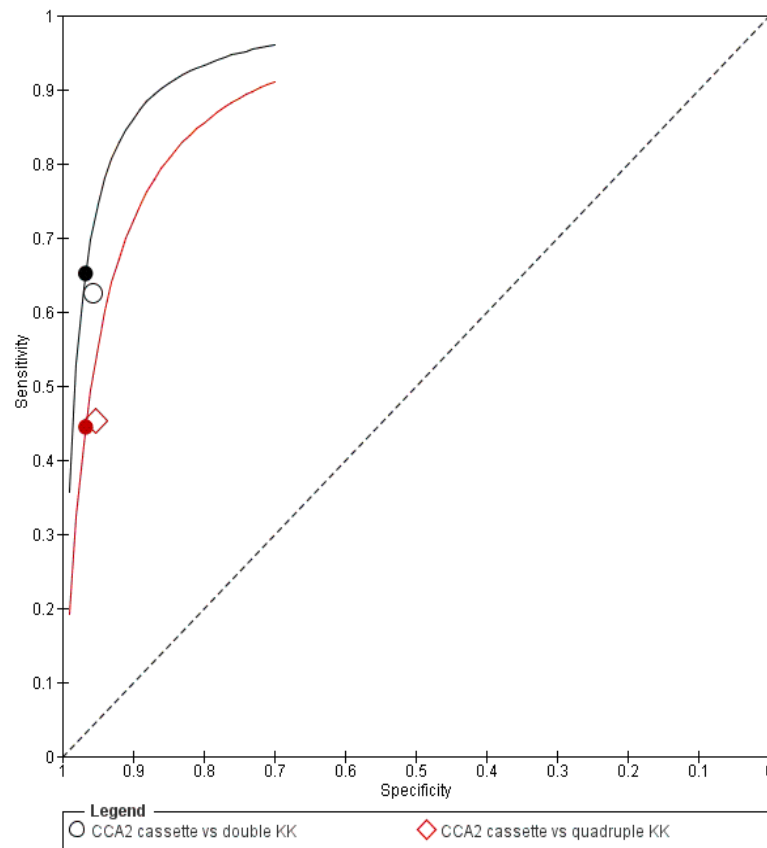

Figure 12 - Forest plot of CCA2 cassette vs duplicate KK and quadruple KK

| Study       | TP | FP | FN | TN | Sensitivity (95% CI) | Specificity (95% CI) | Sensitivity (95% CI) | Specificity (95% CI) |
|-------------|----|----|----|----|----------------------|----------------------|----------------------|----------------------|
| Adriko 2014 | 5  | 4  | 3  | 88 | 0.63 [0.24, 0.91]    | 0.96 [0.89, 0.99]    |                      |                      |
| Adriko 2014 | 5  | 4  | 6  | 85 | 0.45 [0.17, 0.77]    | 0.96 [0.89, 0.99]    |                      |                      |

Figure 13 - Summary ROC Plot of CCA2 cassette vs duplicate KK and quadruple KK

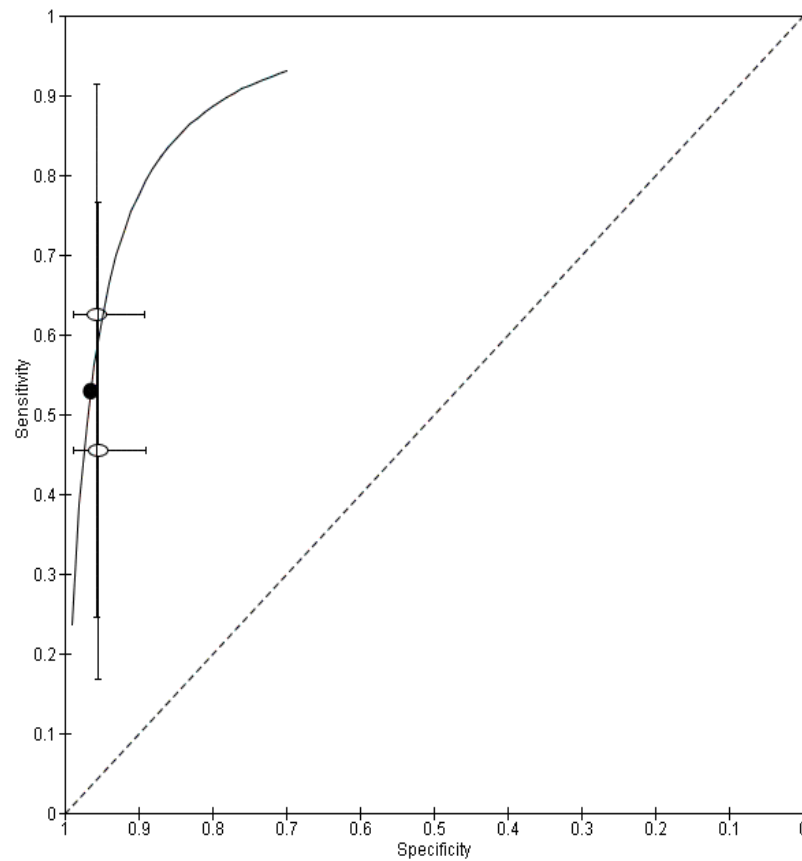

Figure 14 - Forest plot of CAA cassette vs duplicate KK or quadruple KK

**CAA vs duplicate KK**

| Study             | TP  | FP | FN | TN  | Sensitivity (95% CI) | Specificity (95% CI) | Sensitivity (95% CI) | Specificity (95% CI) |
|-------------------|-----|----|----|-----|----------------------|----------------------|----------------------|----------------------|
| Polman 1995       | 344 | 24 | 40 | 14  | 0.90 [0.86, 0.92]    | 0.37 [0.22, 0.54]    |                      |                      |
| Van Lieshout 1995 | 6   | 1  | 52 | 145 | 0.10 [0.04, 0.21]    | 0.99 [0.96, 1.00]    |                      |                      |
| Van Lieshout 1995 | 27  | 20 | 31 | 126 | 0.47 [0.33, 0.60]    | 0.86 [0.80, 0.91]    |                      |                      |

**CAA vs quadruple KK**

| Study            | TP | FP  | FN | TN  | Sensitivity (95% CI) | Specificity (95% CI) | Sensitivity (95% CI) | Specificity (95% CI) |
|------------------|----|-----|----|-----|----------------------|----------------------|----------------------|----------------------|
| Vonghachack 2017 | 23 | 123 | 1  | 230 | 0.96 [0.79, 1.00]    | 0.65 [0.60, 0.70]    |                      |                      |

Figure 15 - Summary ROC Plot of CAA cassette vs duplicate KK or quadruple KK

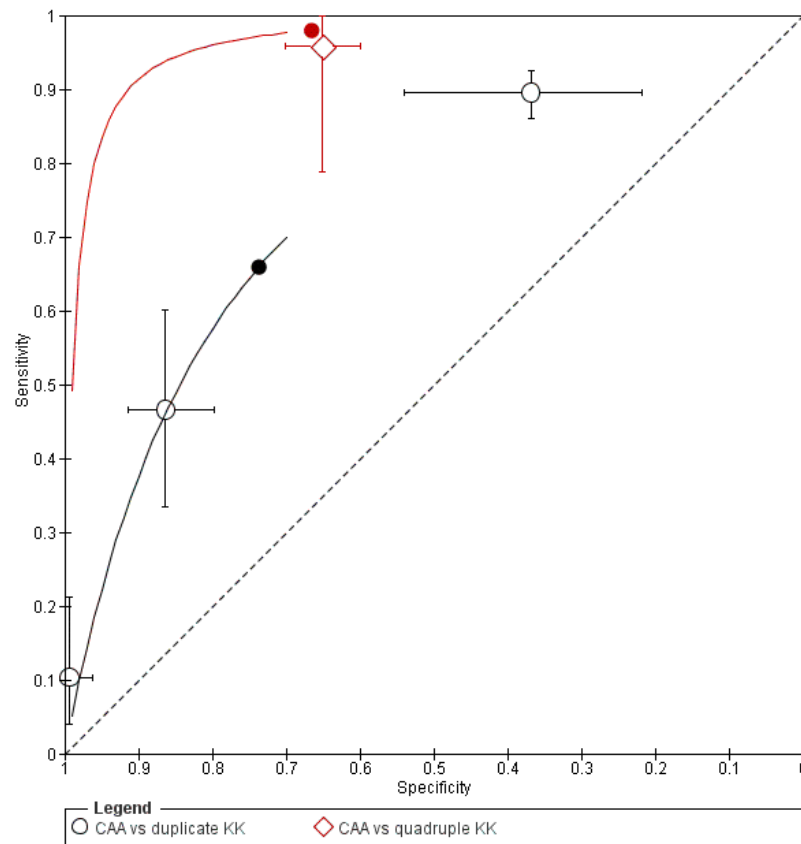

Figure 16 - Forest plot of CAA cassette vs duplicate KK and quadruple KK

| Study             | TP  | FP  | FN | TN  | Sensitivity (95% CI) | Specificity (95% CI) | Sensitivity (95% CI) | Specificity (95% CI) |
|-------------------|-----|-----|----|-----|----------------------|----------------------|----------------------|----------------------|
| Polman 1995       | 344 | 24  | 40 | 14  | 0.90 [0.86, 0.92]    | 0.37 [0.22, 0.54]    |                      |                      |
| Van Lieshout 1995 | 6   | 1   | 52 | 145 | 0.10 [0.04, 0.21]    | 0.99 [0.96, 1.00]    |                      |                      |
| Van Lieshout 1995 | 27  | 20  | 31 | 126 | 0.47 [0.33, 0.60]    | 0.86 [0.80, 0.91]    |                      |                      |
| Vonghachack 2017  | 23  | 123 | 1  | 230 | 0.96 [0.79, 1.00]    | 0.65 [0.60, 0.70]    |                      |                      |

Figure 17 - Summary ROC Plot of CAA cassette vs duplicate KK and quadruple KK

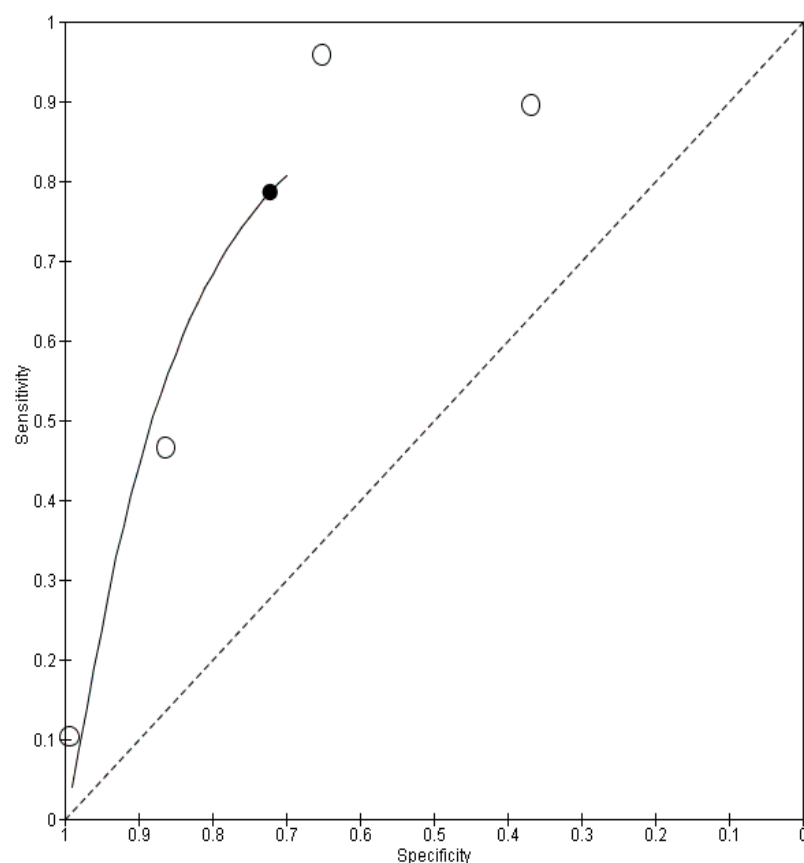

Figure 18 - Forest plot of CAA cassette vs Urine Microscopy

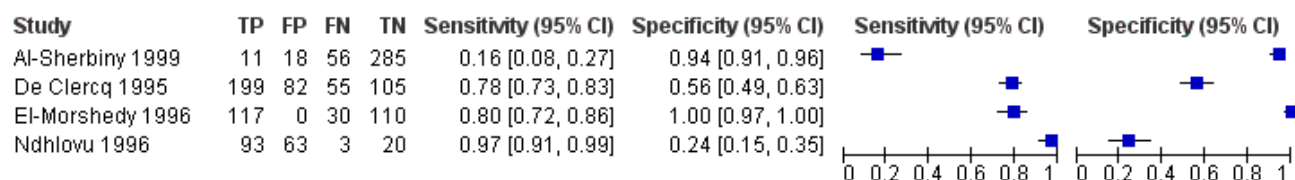

Figure 19 - Summary ROC Plot of CAA cassette vs Urine Microscopy

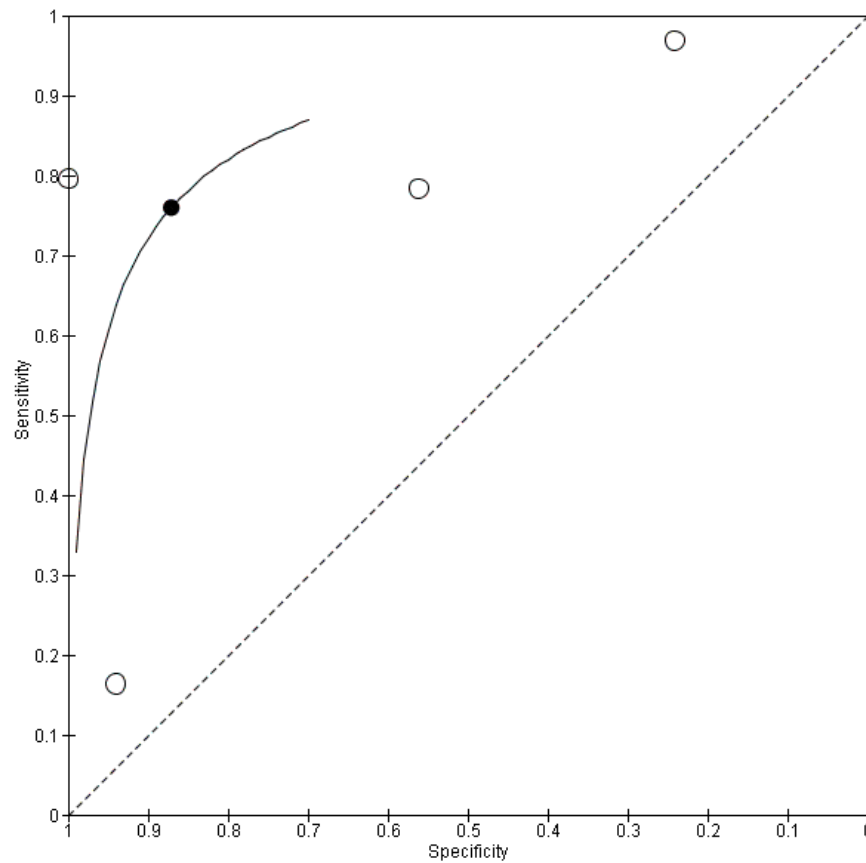

Figure 20 - Forest plot of FLOTAC (fresh), FLOTAC (10 days) or FLOTAC (30 days) vs triplicate KK

**FLOTAC (fresh) vs triplicate KK**

| Study       | TP | FP | FN | TN | Sensitivity (95% CI) | Specificity (95% CI) | Sensitivity (95% CI) | Specificity (95% CI) |
|-------------|----|----|----|----|----------------------|----------------------|----------------------|----------------------|
| Glintz 2010 | 51 | 9  | 21 | 31 | 0.71 [0.59, 0.81]    | 0.78 [0.62, 0.89]    |                      |                      |

**FLOTAC (10 days) vs triplicate KK**

| Study       | TP | FP | FN | TN | Sensitivity (95% CI) | Specificity (95% CI) | Sensitivity (95% CI) | Specificity (95% CI) |
|-------------|----|----|----|----|----------------------|----------------------|----------------------|----------------------|
| Glintz 2010 | 69 | 12 | 3  | 28 | 0.96 [0.88, 0.99]    | 0.70 [0.53, 0.83]    |                      |                      |

**FLOTAC (30 days) vs triplicate KK**

| Study       | TP | FP | FN | TN | Sensitivity (95% CI) | Specificity (95% CI) | Sensitivity (95% CI) | Specificity (95% CI) |
|-------------|----|----|----|----|----------------------|----------------------|----------------------|----------------------|
| Glintz 2010 | 71 | 14 | 1  | 26 | 0.99 [0.93, 1.00]    | 0.65 [0.48, 0.79]    |                      |                      |

Figure 21 - Summary ROC Plot of FLOTAC (fresh), FLOTAC (10 days) or FLOTAC (30 days) vs triplicate KK

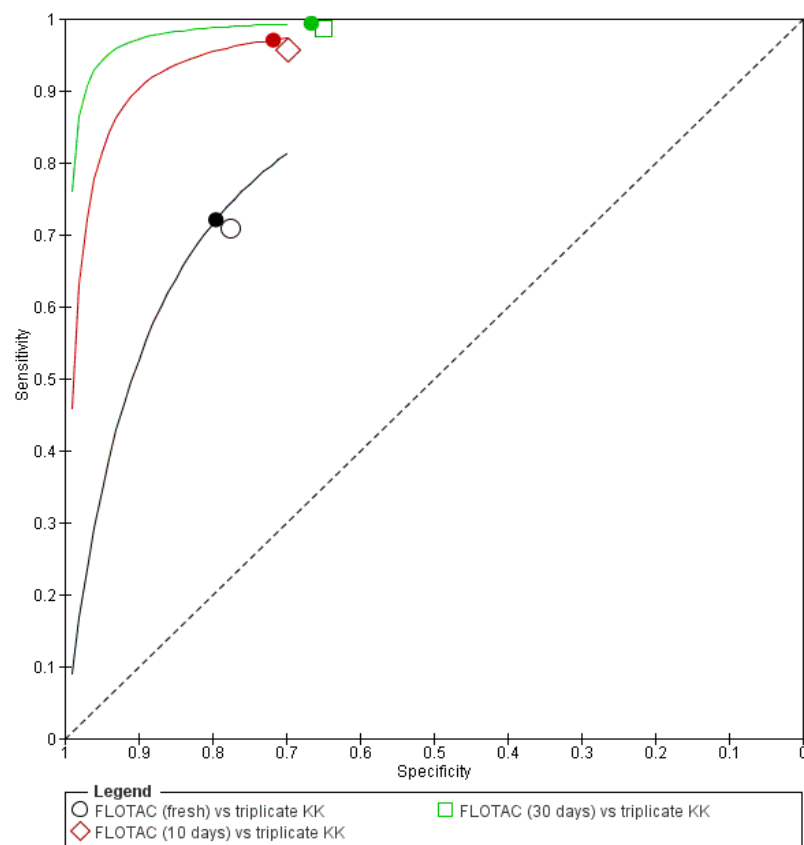

Figure 22 - Forest plot of FLOTAC (fresh), FLOTAC (10 days) or FLOTAC (30 days) vs triplicate KK

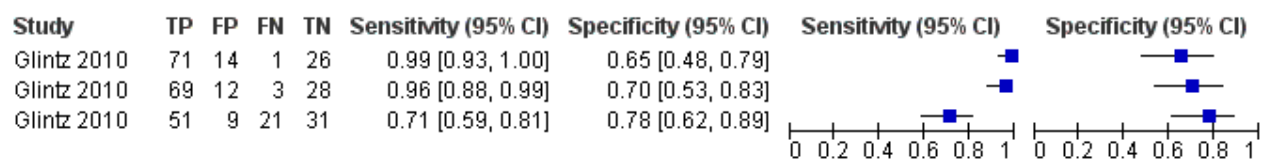

Figure 23 - Summary ROC Plot of FLOTAC (fresh), FLOTAC (10 days) and FLOTAC (30 days) vs triplicate KK

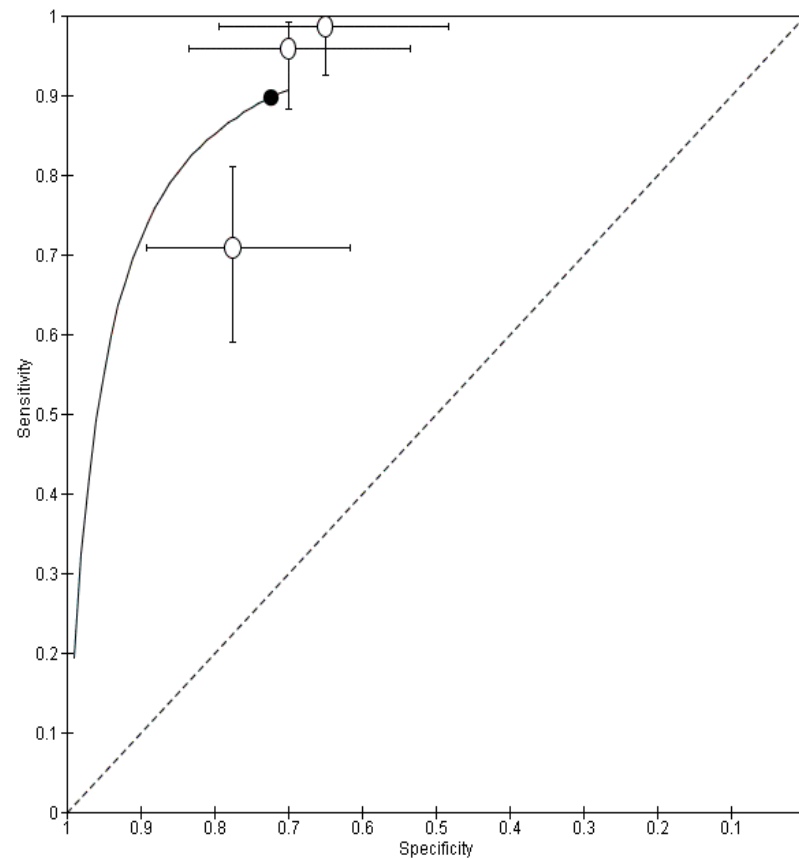

Figure 24 - Forest plot of SmCTF-RDT vs quadruple KK or Urine Microscopy

#### SmCTF-RDT vs quadruple KK

| Study          | TP | FP | FN | TN | Sensitivity (95% CI) | Specificity (95% CI) | Sensitivity (95% CI) | Specificity (95% CI) |
|----------------|----|----|----|----|----------------------|----------------------|----------------------|----------------------|
| Coulibaly 2013 | 18 | 62 | 6  | 32 | 0.75 [0.53, 0.90]    | 0.34 [0.25, 0.45]    |                      |                      |
| Dawson 2013    | 21 | 14 | 3  | 2  | 0.88 [0.68, 0.97]    | 0.13 [0.02, 0.38]    |                      |                      |
| Dawson 2013    | 7  | 17 | 6  | 12 | 0.54 [0.25, 0.81]    | 0.41 [0.24, 0.61]    |                      |                      |
| Nausch 2014    | 53 | 23 | 0  | 15 | 1.00 [0.93, 1.00]    | 0.39 [0.24, 0.57]    |                      |                      |

#### SmCTF-RDT vs 2 urine filtrations

| Study          | TP | FP | FN | TN | Sensitivity (95% CI) | Specificity (95% CI) | Sensitivity (95% CI) | Specificity (95% CI) |
|----------------|----|----|----|----|----------------------|----------------------|----------------------|----------------------|
| Coulibaly 2013 | 4  | 74 | 2  | 37 | 0.67 [0.22, 0.96]    | 0.33 [0.25, 0.43]    |                      |                      |



Figure 25 - Summary ROC Plot of SmCTF-RDT vs quadruple KK or Urine Microscopy

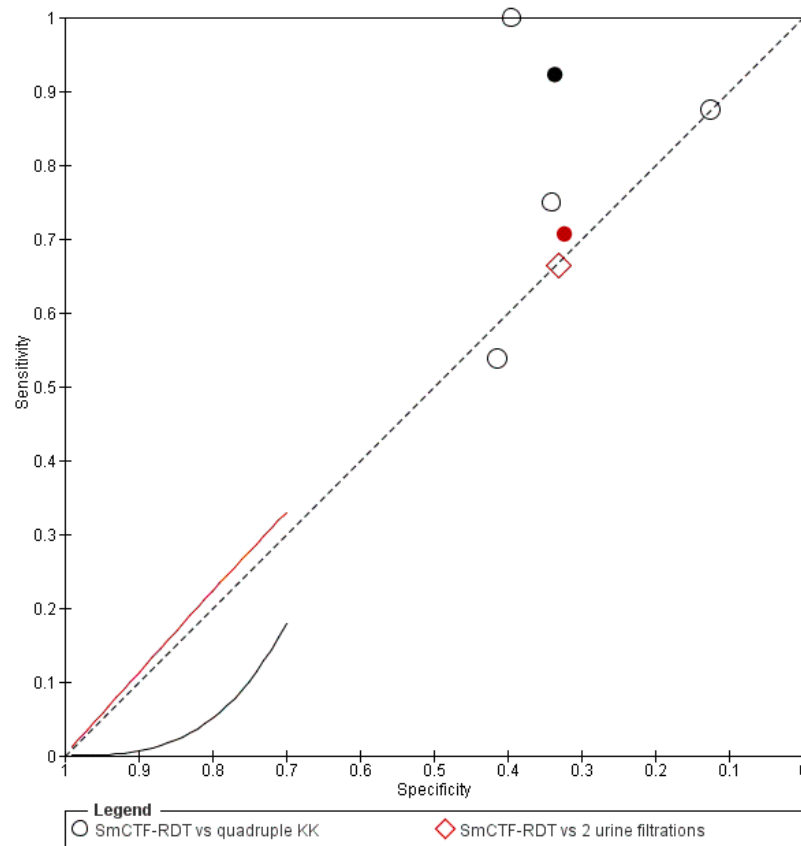

Figure 26 - Forest plot of Sm DNA PCR vs duplicate KK

| Study     | TP | FP | FN | TN | Sensitivity (95% CI) | Specificity (95% CI) | Sensitivity (95% CI) | Specificity (95% CI) |
|-----------|----|----|----|----|----------------------|----------------------|----------------------|----------------------|
| Lodh 2013 | 45 | 34 | 0  | 10 | 1.00 [0.92, 1.00]    | 0.23 [0.11, 0.38]    |                      |                      |

Figure 27 - Summary ROC Plot of Sm DNA PCR vs duplicate KK

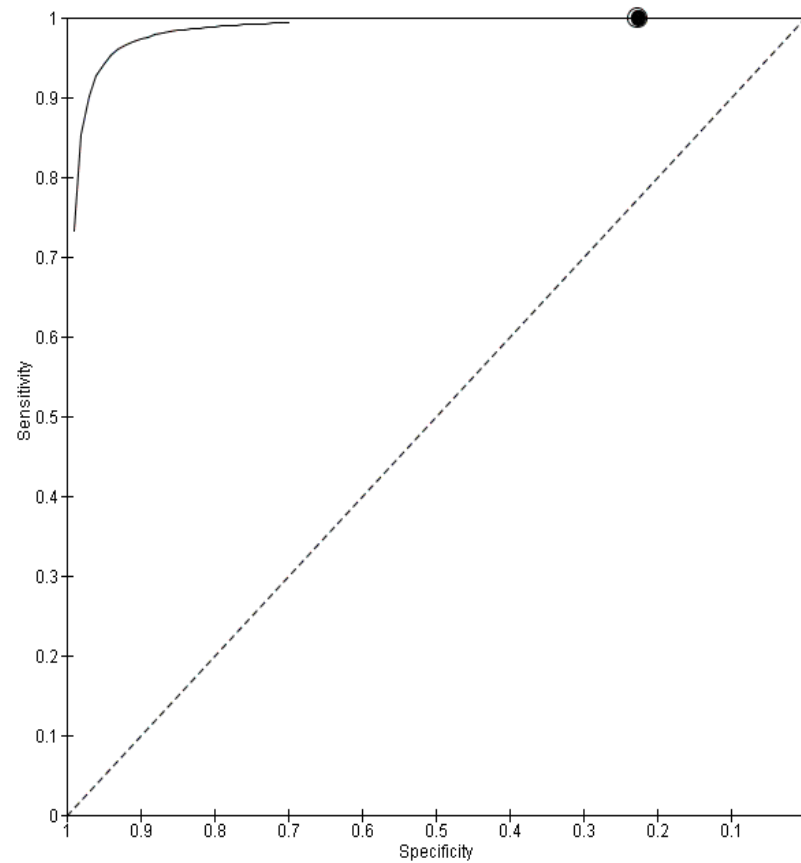

Figure 28 - Forest plot of SWAP ELISA vs Sextuple KK, IgM ELISA or IgG ELISA vs triplicate KK

**SWAP ELISA vs Sextuple KK**

| Study      | TP  | FP  | FN | TN  | Sensitivity (95% CI) | Specificity (95% CI) | Sensitivity (95% CI) | Specificity (95% CI) |
|------------|-----|-----|----|-----|----------------------|----------------------|----------------------|----------------------|
| Shane 2011 | 172 | 126 | 15 | 169 | 0.92 [0.87, 0.95]    | 0.57 [0.51, 0.63]    |                      |                      |

**IgM ELISA vs triplicate KK**

| Study            | TP | FP | FN | TN | Sensitivity (95% CI) | Specificity (95% CI) | Sensitivity (95% CI) | Specificity (95% CI) |
|------------------|----|----|----|----|----------------------|----------------------|----------------------|----------------------|
| De Oliveira 2005 | 49 | 2  | 1  | 85 | 0.98 [0.89, 1.00]    | 0.98 [0.92, 1.00]    |                      |                      |

**IgG ELISA vs triplicate KK**

| Study            | TP  | FP | FN | TN  | Sensitivity (95% CI) | Specificity (95% CI) | Sensitivity (95% CI) | Specificity (95% CI) |
|------------------|-----|----|----|-----|----------------------|----------------------|----------------------|----------------------|
| Barakat 1983     | 177 | 25 | 15 | 290 | 0.92 [0.87, 0.96]    | 0.92 [0.89, 0.95]    |                      |                      |
| De Oliveira 2005 | 48  | 1  | 2  | 86  | 0.96 [0.86, 1.00]    | 0.99 [0.94, 1.00]    |                      |                      |
| Eltiro 1992      | 163 | 23 | 4  | 10  | 0.98 [0.94, 0.99]    | 0.30 [0.16, 0.49]    |                      |                      |
| Xu 2015          | 87  | 6  | 16 | 1   | 0.84 [0.76, 0.91]    | 0.14 [0.00, 0.58]    |                      |                      |

Figure 29 - Summary ROC Plot of SWAP ELISA vs Sextuple KK, IgM ELISA or IgG ELISA vs triplicate KK

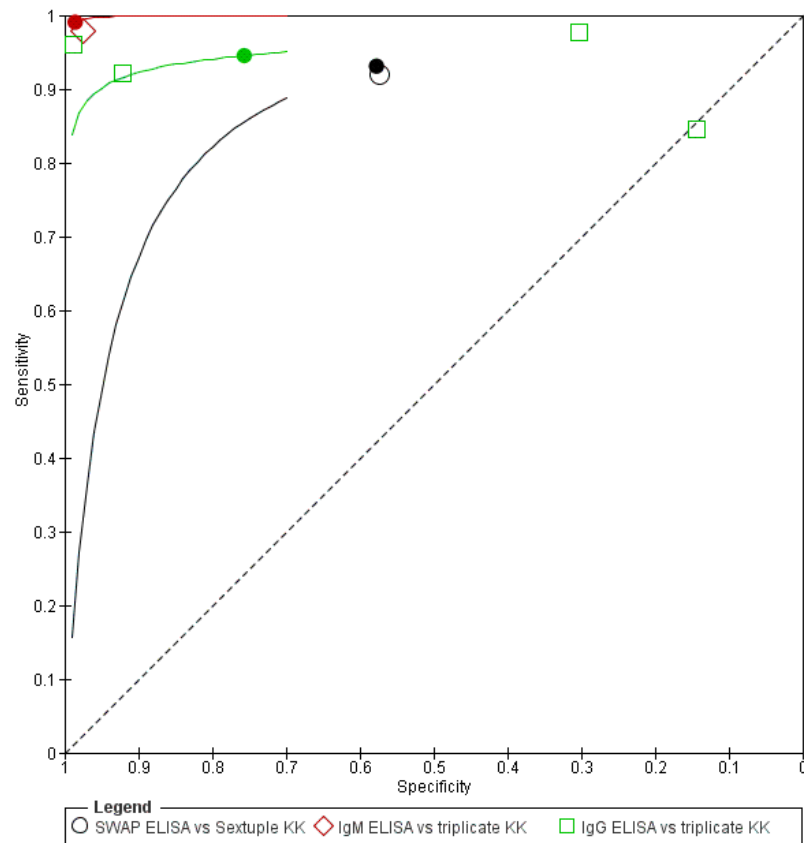

Figure 30 - Forest plot of Anti IGg RDT-Sh vs Urine Microscopy

| Study       | TP | FP | FN | TN | Sensitivity (95% CI) | Specificity (95% CI) | Sensitivity (95% CI) | Specificity (95% CI) |
|-------------|----|----|----|----|----------------------|----------------------|----------------------|----------------------|
| Sheele 2013 | 38 | 70 | 44 | 8  | 0.46 [0.35, 0.58]    | 0.10 [0.05, 0.19]    |                      |                      |

*Figure 31 - Summary ROC Plot of Anti IgG RDT-Sh vs Urine Microscopy*

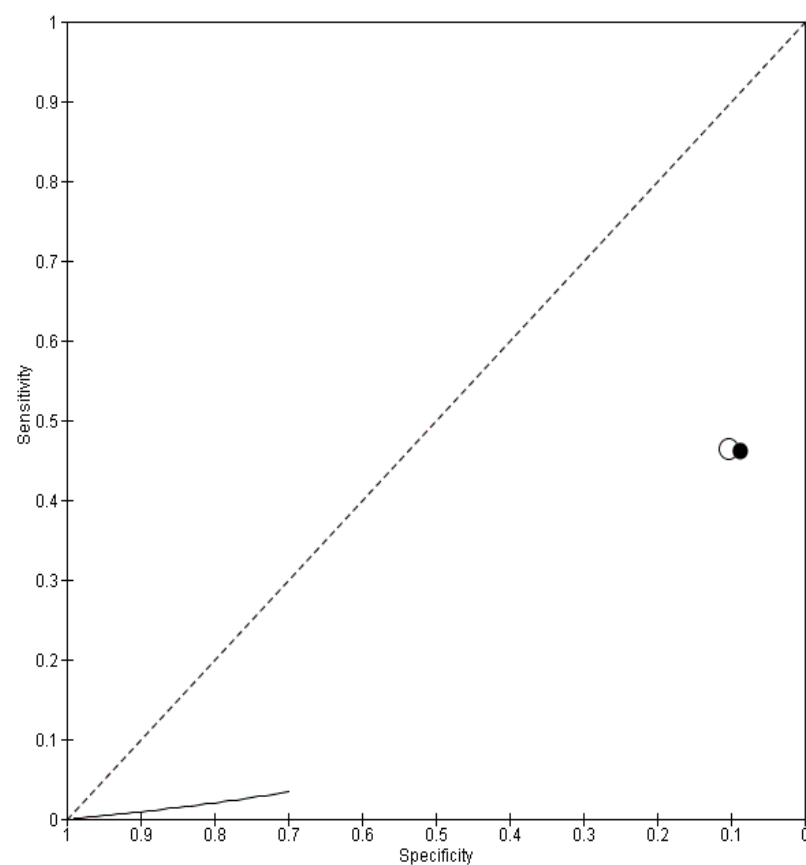

Figure 32 - Forest plot of Proteinuria (R strip) vs Urine Microscopy

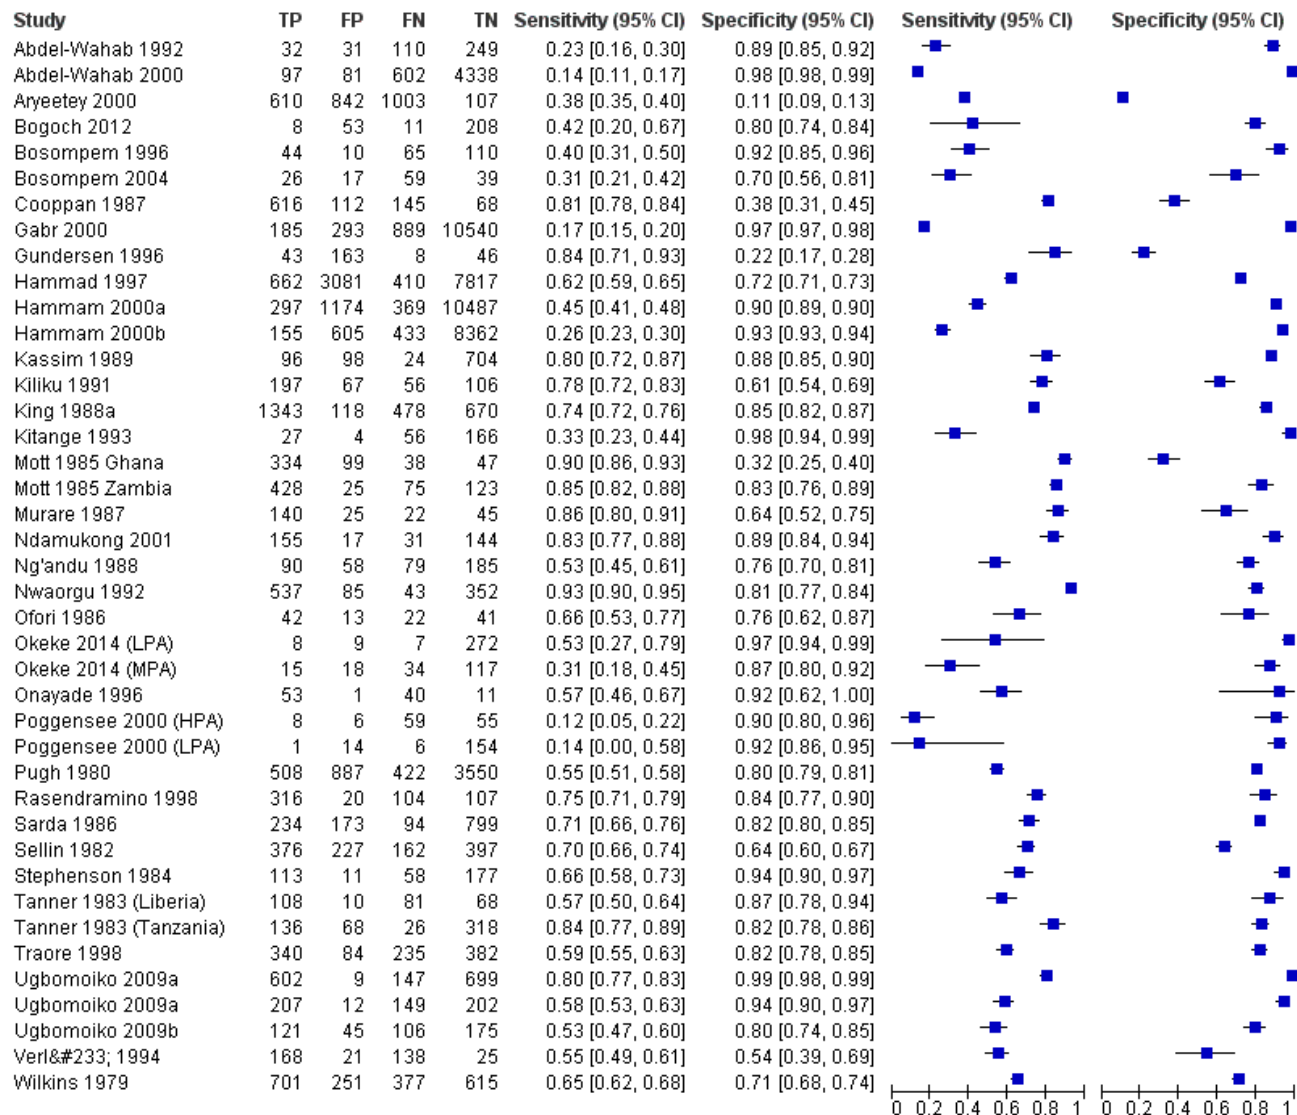

Figure 33 - Summary ROC Plot of Proteinuria (R strip) vs Urine Microscopy

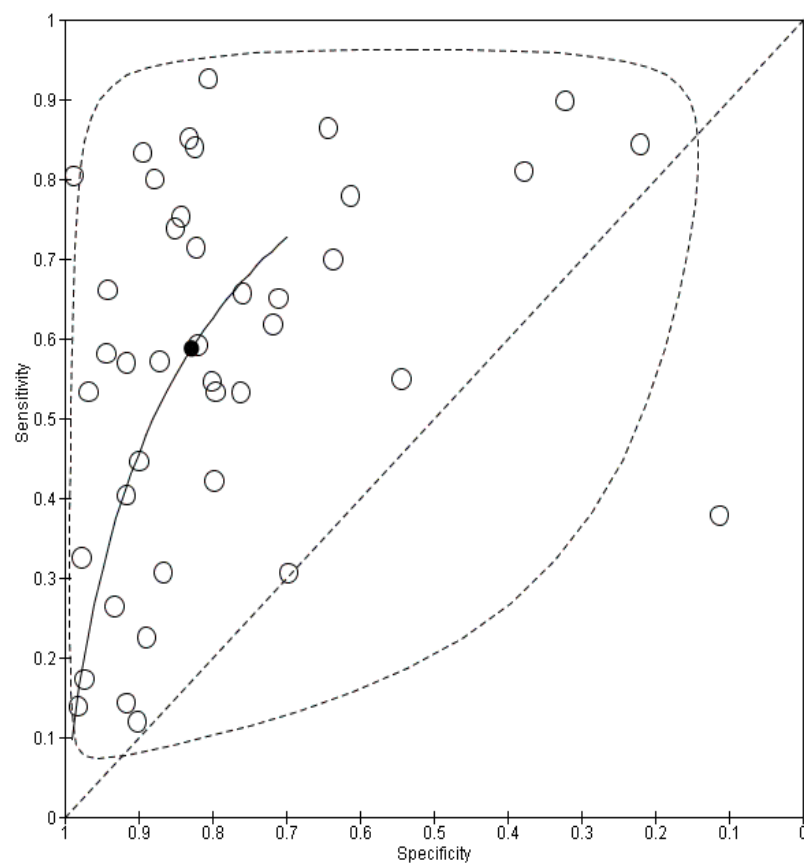

Figure 34 - Forest plot of Haematuria (R strip) vs Urine Microscop

Figure 35 - Summary ROC Plot of Haematuria (R strip) vs Urine Microscopy

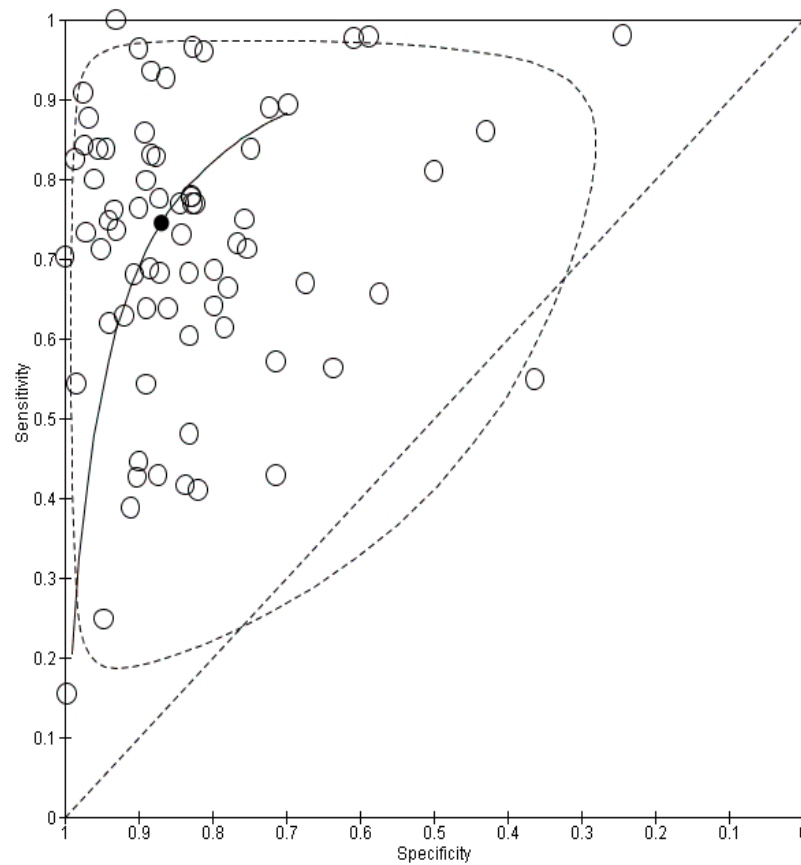

Figure 36 - Forest plot of AWE-SEA ELISA vs quadruple KK

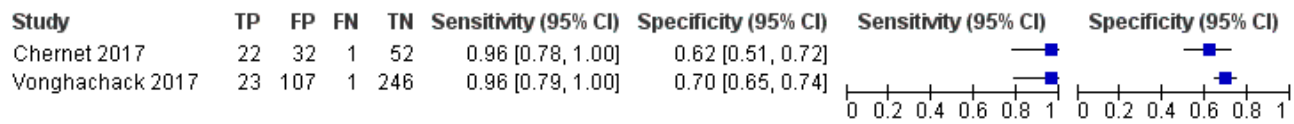

Figure 37 - Summary ROC Plot of AWE-SEA ELISA vs quadruple KK

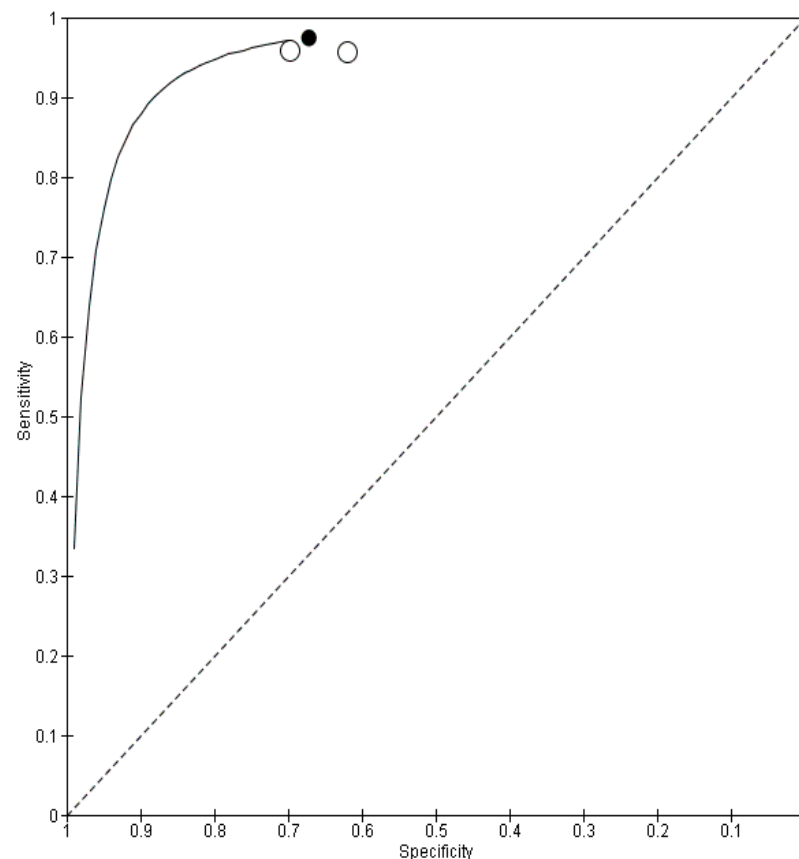

Figure 38 - Forest plot of LAMP vs triplicate KK or Urine Microscopy

#### LAMP vs triplicate KK

| Study       | TP  | FP | FN | TN  | Sensitivity (95% CI) | Specificity (95% CI) | Sensitivity (95% CI) | Specificity (95% CI) |
|-------------|-----|----|----|-----|----------------------|----------------------|----------------------|----------------------|
| Mwangi 2018 | 171 | 0  | 5  | 207 | 0.97 [0.93, 0.99]    | 1.00 [0.98, 1.00]    |                      |                      |
| Xu 2015     | 105 | 0  | 5  | 0   | 0.95 [0.90, 0.99]    | Not estimable        |                      |                      |

#### LAMP vs Urine Microscopy

| Study           | TP | FP | FN | TN | Sensitivity (95% CI) | Specificity (95% CI) | Sensitivity (95% CI) | Specificity (95% CI) |
|-----------------|----|----|----|----|----------------------|----------------------|----------------------|----------------------|
| Gandasegui 2015 | 18 | 8  | 7  | 61 | 0.72 [0.51, 0.88]    | 0.88 [0.78, 0.95]    |                      |                      |
| Gandasegui 2018 | 75 | 52 | 12 | 33 | 0.86 [0.77, 0.93]    | 0.39 [0.28, 0.50]    |                      |                      |



Figure 39 - Summary ROC Plot of LAMP vs triplicate KK or Urine Microscopy

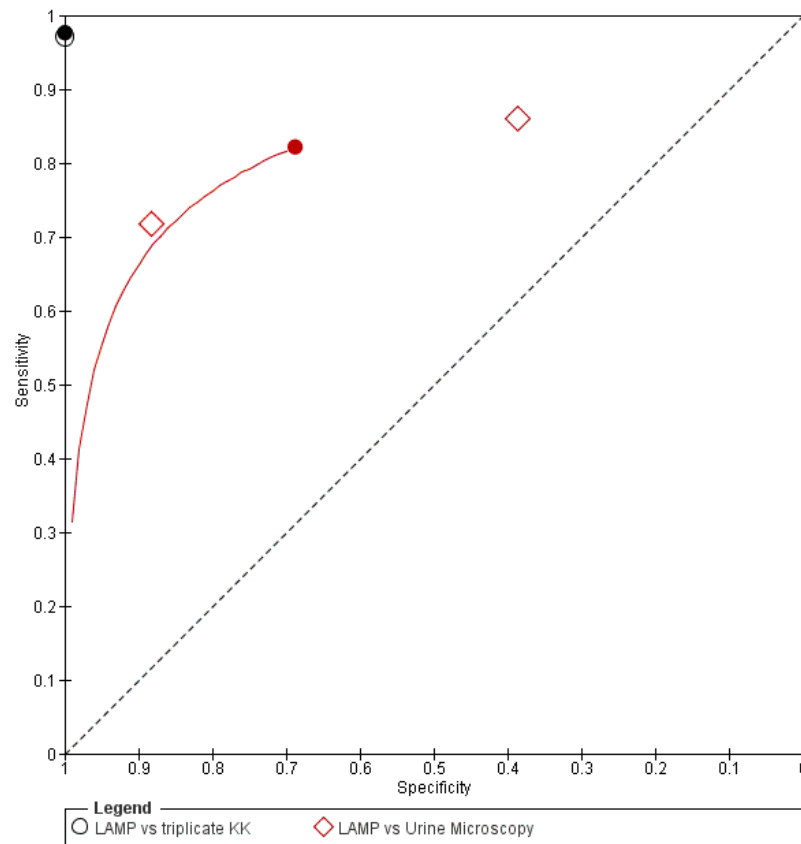

Figure 40 - Forest plot of IHA vs triplicate KK or Urine Microscopy.

#### IHA vs triplicate KK

| Study   | TP | FP | FN | TN | Sensitivity (95% CI) | Specificity (95% CI) | Sensitivity (95% CI) | Specificity (95% CI) |
|---------|----|----|----|----|----------------------|----------------------|----------------------|----------------------|
| Xu 2015 | 84 | 0  | 9  | 0  | 0.90 [0.82, 0.95]    | Not estimable        |                      |                      |
| Xu 2015 | 96 | 5  | 9  | 0  | 0.91 [0.84, 0.96]    | 0.00 [0.00, 0.52]    |                      |                      |

#### IHA vs Urine Microscopy

| Study      | TP | FP | FN | TN | Sensitivity (95% CI) | Specificity (95% CI) | Sensitivity (95% CI) | Specificity (95% CI) |
|------------|----|----|----|----|----------------------|----------------------|----------------------|----------------------|
| Zhang 2020 | 66 | 16 | 23 | 41 | 0.74 [0.64, 0.83]    | 0.72 [0.58, 0.83]    |                      |                      |

Figure 41 - Summary ROC Plot of IHA vs triplicate KK or Urine Microscopy

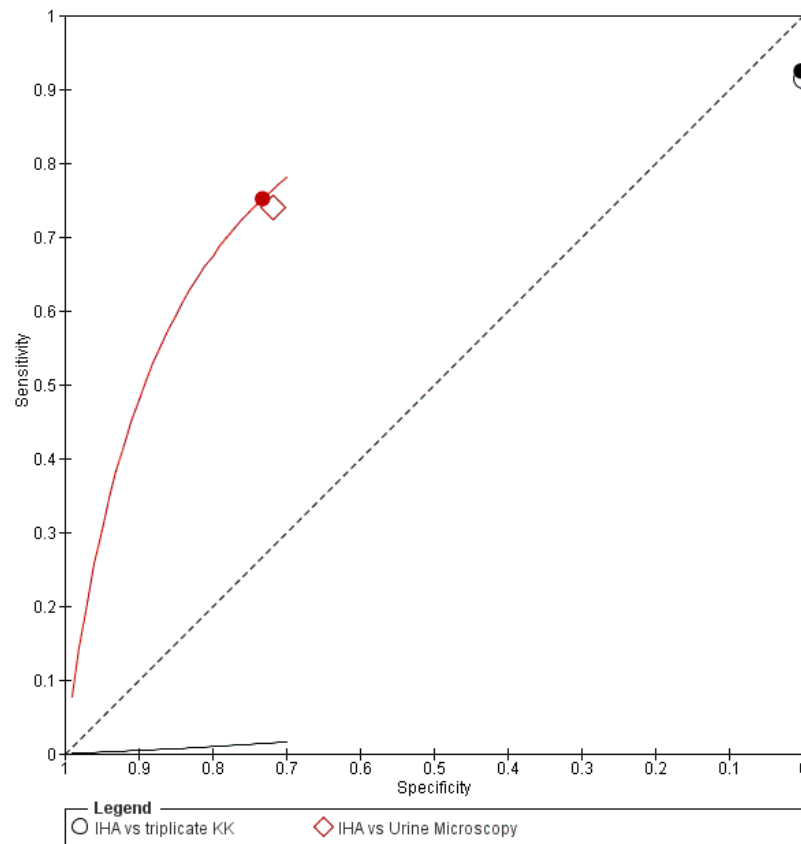

Figure 42 - Forest plot of Colorimetric test vs Urine Microscopy

| Study          | TP  | FP  | FN  | TN  | Sensitivity (95% CI) | Specificity (95% CI) | Sensitivity (95% CI) | Specificity (95% CI) |
|----------------|-----|-----|-----|-----|----------------------|----------------------|----------------------|----------------------|
| Bocanegra 2015 | 415 | 124 | 376 | 364 | 0.52 [0.49, 0.56]    | 0.75 [0.70, 0.78]    |                      |                      |

Figure 43 - Summary ROC Plot of Colorimetric test vs Urine Microscopy

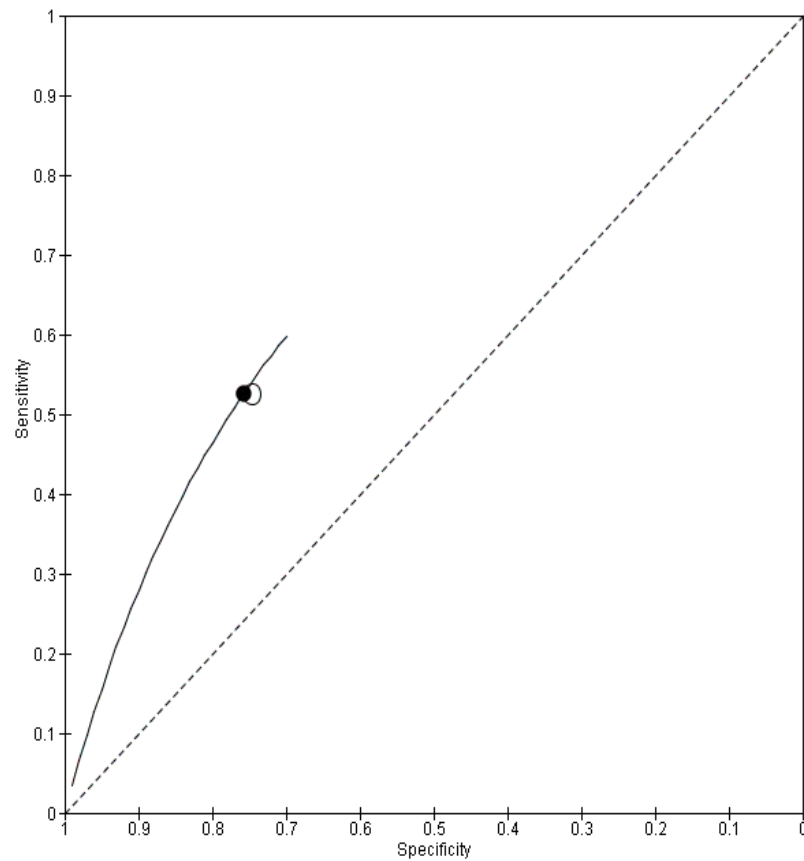

Figure 44 - Forest plot of rSP13 ELISA vs 27KK

| Study   | TP | FP  | FN | TN  | Sensitivity (95% CI) | Specificity (95% CI) | Sensitivity (95% CI) | Specificity (95% CI) |
|---------|----|-----|----|-----|----------------------|----------------------|----------------------|----------------------|
| Xu 2014 | 71 | 394 | 3  | 903 | 0.96 [0.89, 0.99]    | 0.70 [0.67, 0.72]    |                      |                      |

Figure 45 - Summary ROC Plot of rSP13 ELISA vs 27KK

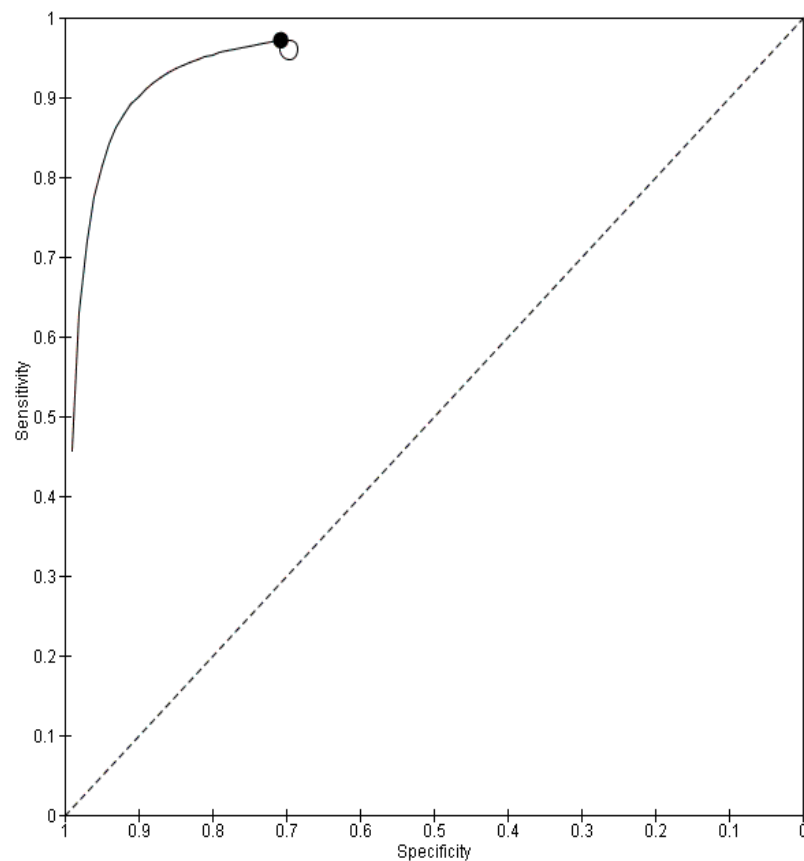

Figure 46 - Forest plot of IgG SEA-ELISA vs Urine Microscopy

#### IgG SEA-ELISA vs CCA1

| Study          | TP  | FP | FN | TN | Sensitivity (95% CI) | Specificity (95% CI) | Sensitivity (95% CI) | Specificity (95% CI) |
|----------------|-----|----|----|----|----------------------|----------------------|----------------------|----------------------|
| Al-Shehri 2018 | 142 | 52 | 5  | 59 | 0.97 [0.92, 0.99]    | 0.53 [0.43, 0.63]    |                      |                      |

#### IgG SEA-ELISA vs Urine Microscopy

| Study          | TP | FP | FN | TN | Sensitivity (95% CI) | Specificity (95% CI) | Sensitivity (95% CI) | Specificity (95% CI) |
|----------------|----|----|----|----|----------------------|----------------------|----------------------|----------------------|
| Bouilhac 1981  | 42 | 5  | 12 | 95 | 0.78 [0.64, 0.88]    | 0.95 [0.89, 0.98]    |                      |                      |
| Song 2018      | 55 | 64 | 3  | 27 | 0.95 [0.86, 0.99]    | 0.30 [0.21, 0.40]    |                      |                      |
| Stothard 2009a | 41 | 31 | 5  | 73 | 0.89 [0.76, 0.96]    | 0.70 [0.60, 0.79]    |                      |                      |
| Uga 1989       | 36 | 2  | 3  | 9  | 0.92 [0.79, 0.98]    | 0.82 [0.48, 0.98]    |                      |                      |

Figure 47 - Summary ROC Plot of IgG SEA-ELISA vs Urine Microscopy

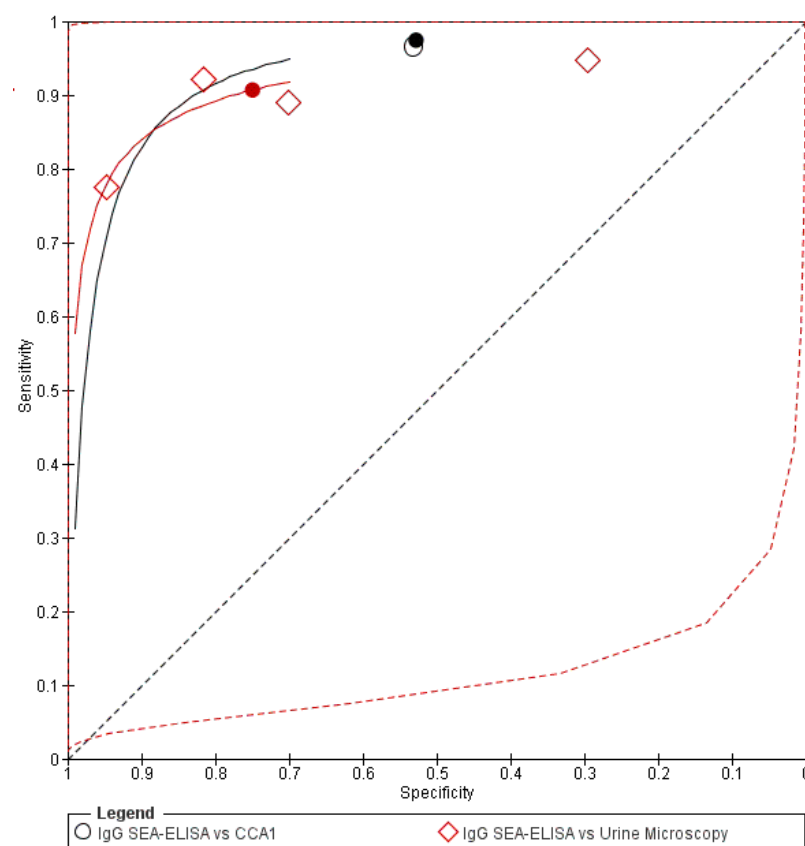

Figure 48 - Forest plot of Leukocyturia (reagent strip) vs Urine Microscopy

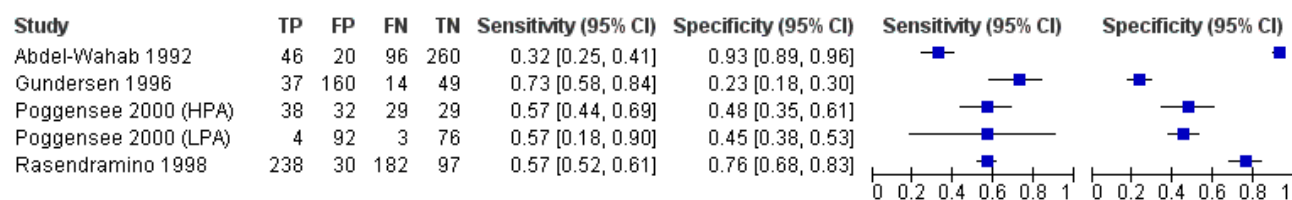

Figure 49 - Summary ROC Plot of Leukocyturia (reagent strip) vs Urine Microscopy

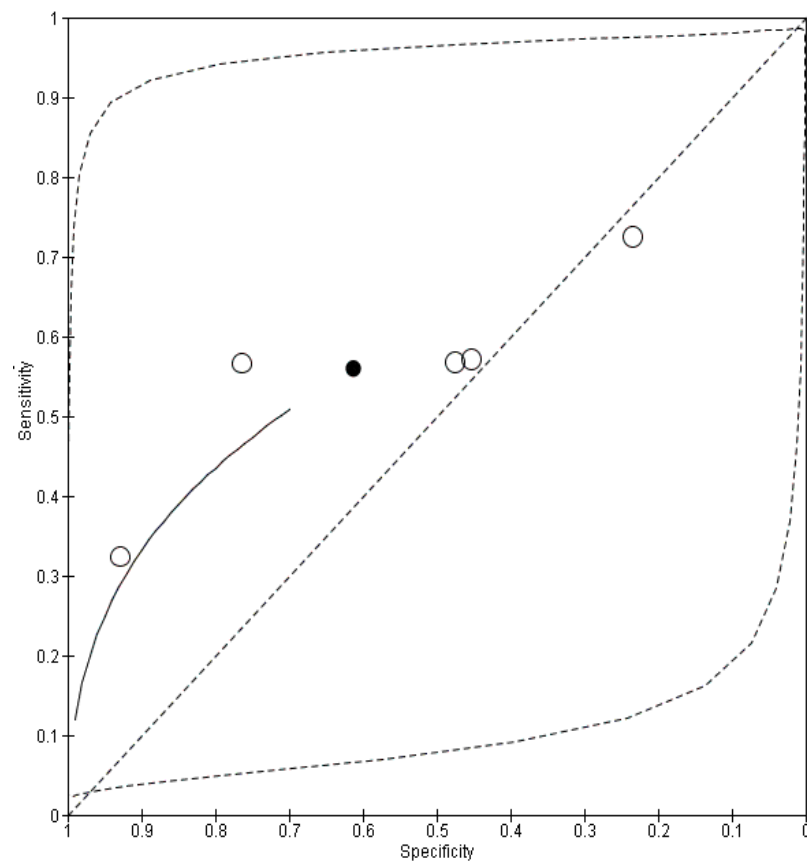

Figure 50 - Forest plot of COPT vs duplicate KK

| Study               | TP | FP | FN | TN  | Sensitivity (95% CI) | Specificity (95% CI) | Sensitivity (95% CI) | Specificity (95% CI) |
|---------------------|----|----|----|-----|----------------------|----------------------|----------------------|----------------------|
| Espirito-Santo 2015 | 4  | 25 | 1  | 542 | 0.80 [0.28, 0.99]    | 0.96 [0.94, 0.97]    |                      |                      |

Figure 51 - Summary ROC Plot of COPT vs duplicate KK

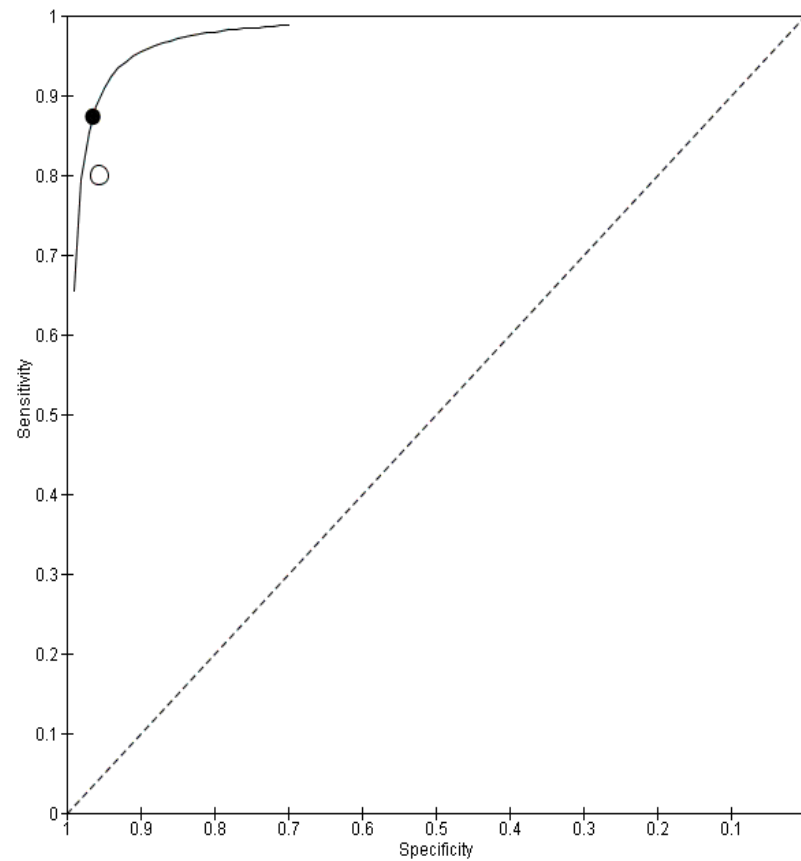

Figure 52 - Forest plot of PCR vs KK

#### PCR vs KK

| Study      | TP  | FP | FN | TN | Sensitivity (95% CI) | Specificity (95% CI) |
|------------|-----|----|----|----|----------------------|----------------------|
| Anyan 2020 | 45  | 8  | 0  | 38 | 1.00 [0.92, 1.00]    | 0.83 [0.69, 0.92]    |
| Anyan 2020 | 21  | 58 | 0  | 84 | 1.00 [0.84, 1.00]    | 0.59 [0.51, 0.67]    |
| Fuss 2018  | 245 | 31 | 8  | 13 | 0.97 [0.94, 0.99]    | 0.30 [0.17, 0.45]    |

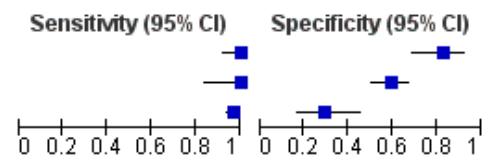

#### PCR vs CCA1

| Study          | TP  | FP | FN | TN | Sensitivity (95% CI) | Specificity (95% CI) |
|----------------|-----|----|----|----|----------------------|----------------------|
| Al-Shehri 2018 | 125 | 49 | 22 | 62 | 0.85 [0.78, 0.90]    | 0.56 [0.46, 0.65]    |

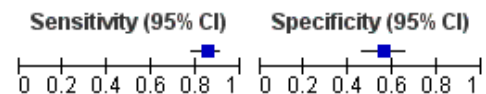

Figure 53 - Summary ROC Plot of PCR vs KK

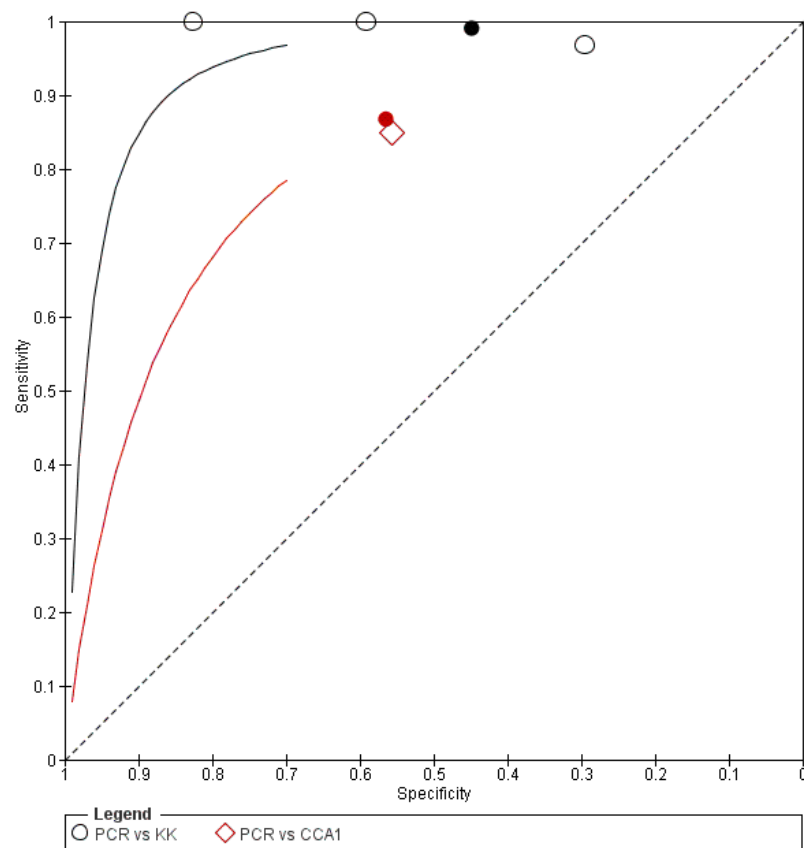

Figure 54 - Forest plot of Helmintex vs duplicate KK or RT-PCR

#### Helmintex vs duplicate KK

| Study         | TP | FP  | FN | TN  | Sensitivity (95% CI) | Specificity (95% CI) | Sensitivity (95% CI) | Specificity (95% CI) |
|---------------|----|-----|----|-----|----------------------|----------------------|----------------------|----------------------|
| Lindholz 2018 | 54 | 133 | 1  | 273 | 0.98 [0.90, 1.00]    | 0.67 [0.62, 0.72]    |                      |                      |

#### Helmintex vs RT-PCR

| Study          | TP | FP | FN | TN | Sensitivity (95% CI) | Specificity (95% CI) | Sensitivity (95% CI) | Specificity (95% CI) |
|----------------|----|----|----|----|----------------------|----------------------|----------------------|----------------------|
| Magalhaes 2020 | 71 | 6  | 33 | 66 | 0.68 [0.58, 0.77]    | 0.92 [0.83, 0.97]    |                      |                      |



Figure 55 - Summary ROC Plot of Helmintex vs duplicate KK or RT-PCR

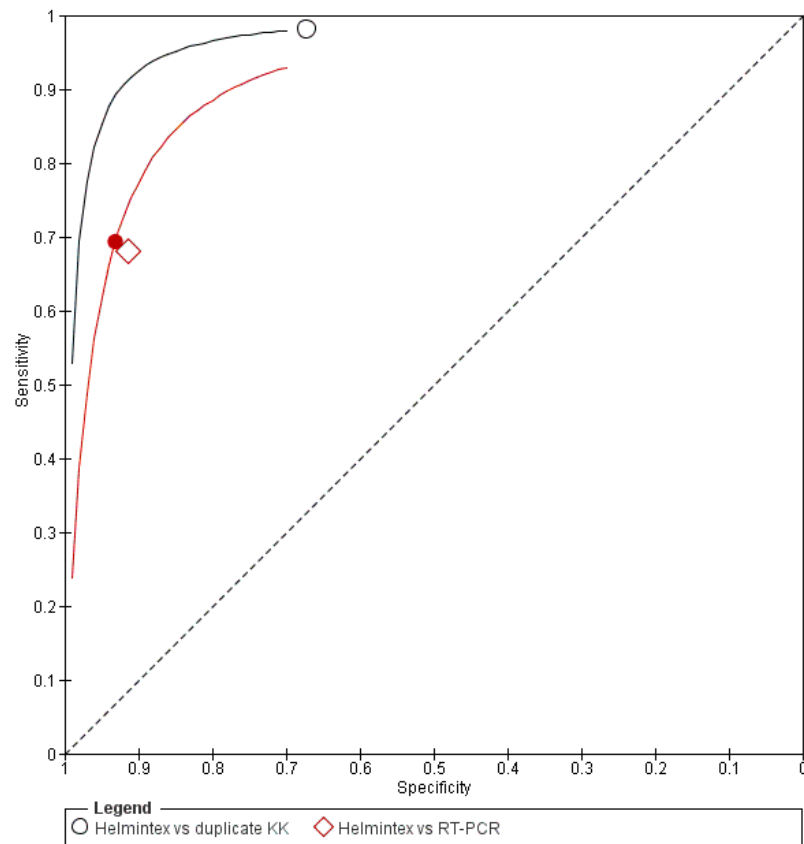

Figure 56 - Forest plot of DDIA vs Urine Microscopy

| Study      | TP | FP | FN | TN | Sensitivity (95% CI) | Specificity (95% CI) | Sensitivity (95% CI) | Specificity (95% CI) |
|------------|----|----|----|----|----------------------|----------------------|----------------------|----------------------|
| Zhang 2020 | 53 | 22 | 36 | 35 | 0.60 [0.49, 0.70]    | 0.61 [0.48, 0.74]    |                      |                      |

Figure 57 - Summary ROC Plot of DDIA vs Urine Microscopy

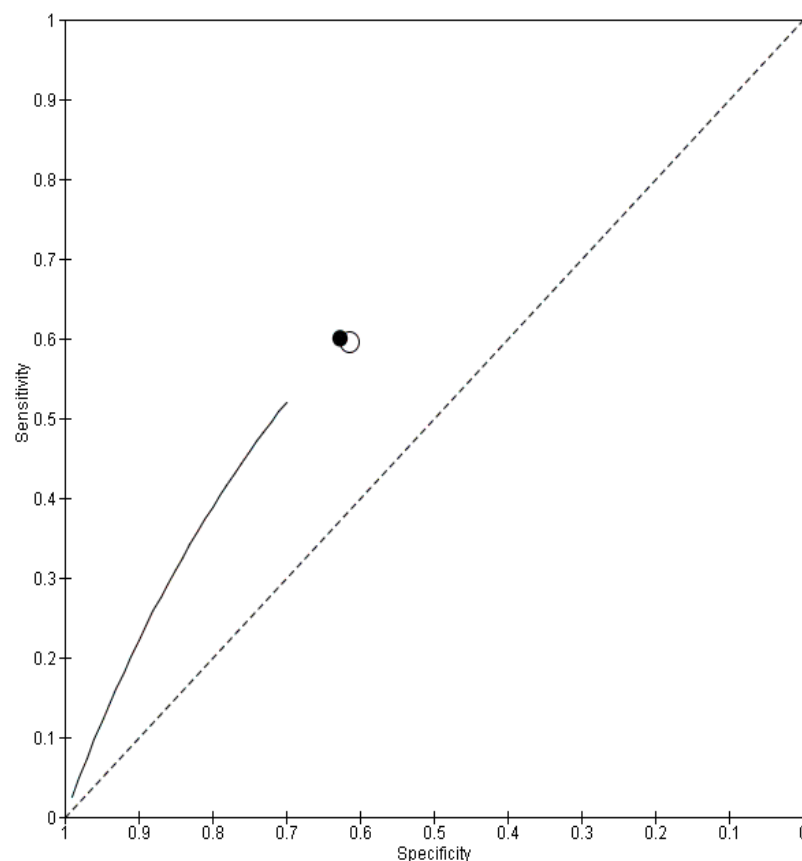

Figure 58 - Forest plot of RT-PCR vs duplicate or sextuple KK

#### RT-PCR vs sextuple KK

| Study          | TP | FP | FN | TN | Sensitivity (95% CI) | Specificity (95% CI) | Sensitivity (95% CI) | Specificity (95% CI) |
|----------------|----|----|----|----|----------------------|----------------------|----------------------|----------------------|
| Magalhaes 2020 | 61 | 42 | 3  | 92 | 0.95 [0.87, 0.99]    | 0.69 [0.60, 0.76]    |                      |                      |

#### RT-PCR vs duplicate KK

| Study          | TP | FP | FN | TN | Sensitivity (95% CI) | Specificity (95% CI) | Sensitivity (95% CI) | Specificity (95% CI) |
|----------------|----|----|----|----|----------------------|----------------------|----------------------|----------------------|
| Magalhaes 2020 | 41 | 73 | 0  | 92 | 1.00 [0.91, 1.00]    | 0.56 [0.48, 0.63]    |                      |                      |

Figure 59 - Summary ROC Plot of RT-PCR vs duplicate or sextuple KK

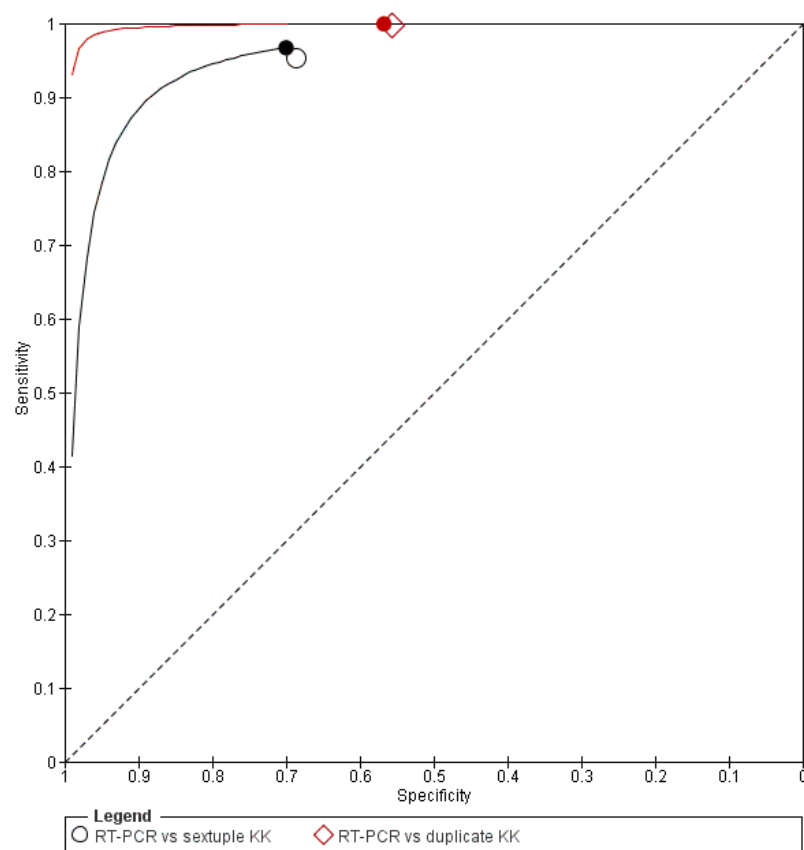

Table 4 - Output parameters of the bayesian bivariate random effects model for each diagnostic test

| Tests                         | Number of | Log OR       | sensitivity | specificity | mu_A         | mu_B         | log_LRP    | log_LRN    | THETA        | ALPHA        | BETA         | var_uTheta  | var_uAlpha  |
|-------------------------------|-----------|--------------|-------------|-------------|--------------|--------------|------------|------------|--------------|--------------|--------------|-------------|-------------|
| Anti IgG RDT-Sh vs Urine      | 1         | -2.238353753 | 0.4750171   | 0.1924764   | -0.140684572 | -2.097669181 | -0.3234917 | 0.64861297 | 1.096590043  | -2.503288878 | -7.89282E-05 | 15.2984012  | 34.17554201 |
| CAA vs quadruple KK           | 1         | 4.081914373  | 0.8886117   | 0.6082348   | 3.459103391  | 0.622810982  | 0.5048489  | -1.267904  | 1.590849786  | 4.554447066  | 0.001643751  | 9.13593147  | 50.23527747 |
| CCA1 cassette vs 16KK         | 1         | 2.277921806  | 0.7243738   | 0.6486684   | 1.408791181  | 0.869130625  | 0.441738   | -0.5475509 | 0.304658913  | 2.538670821  | -0.001132837 | 10.43499892 | 45.79873619 |
| CCA1 cassette vs Helmintex    | 1         | 1.144999291  | 0.5432535   | 0.6527018   | 0.241858977  | 0.903140313  | 0.2769149  | -0.220352  | -0.368729918 | 1.276607066  | -0.003124266 | 8.807907682 | 58.02299557 |
| CCA1 cassette vs RT-PCR       | 1         | 1.510160949  | 0.6010372   | 0.6588832   | 0.582857738  | 0.927303211  | 0.3501912  | -0.3056633 | -0.193593254 | 1.688365171  | 0.002246661  | 9.248954961 | 45.67658588 |
| CCA1 cassette vs single KK    | 1         | 2.410319734  | 0.7562486   | 0.6151916   | 1.740500544  | 0.66981919   | 0.4146614  | -0.6321272 | 0.603030518  | 2.688162377  | 0.005605331  | 12.29940568 | 43.7234469  |
| CCA2 cassette vs double KK    | 1         | 3.579696688  | 0.5911522   | 0.8780587   | 0.556026416  | 3.023670272  | 1.0533053  | -0.5013372 | -1.385015473 | 4.019668951  | -0.005882899 | 9.896652799 | 91.75244201 |
| CCA2 cassette vs quadruple KK | 1         | 2.835131804  | 0.4659715   | 0.8804041   | -0.200022172 | 3.035153976  | 0.9091536  | -0.3221285 | -1.803383666 | 3.161558287  | -0.003675857 | 8.83534338  | 48.81253504 |
| Colorimetric vs Urine         | 1         | 1.114506685  | 0.5160936   | 0.6732351   | 0.093675448  | 1.020831237  | 0.2841151  | -0.199909  | -0.51683996  | 1.241492915  | 0.002570233  | 11.00327534 | 28.83788873 |
| COPT vs double KK             | 1         | 4.684197395  | 0.7350894   | 0.8799962   | 1.722634157  | 2.961563238  | 1.1601835  | -0.8741376 | -0.692838549 | 5.237115007  | -0.003188704 | 11.55127901 | 35.25290579 |
| DDiA vs Urine Microscopy      | 1         | 0.832918533  | 0.5646498   | 0.5801309   | 0.360361299  | 0.472557234  | 0.1865608  | -0.1751711 | -0.054933704 | 0.924455334  | 0.005711664  | 11.01099038 | 37.42106684 |
| FLOTAC (10 days) vs tripl. KK | 1         | 3.956488745  | 0.8833156   | 0.6429088   | 3.115065647  | 0.841423098  | 0.5629556  | -1.1553256 | 1.279522736  | 4.418929496  | 0.003135842  | 8.793739077 | 77.55297861 |
| FLOTAC (30 days) vs tripl. KK | 1         | 5.1183735    | 0.9340129   | 0.6085309   | 4.491480802  | 0.626892699  | 0.5423365  | -1.6805448 | 2.180595587  | 5.735354236  | 0.006605618  | 23.92579793 | 34.06264541 |
| FLOTAC (fresh) vs tripl. KK   | 1         | 2.069096406  | 0.645669    | 0.7001996   | 0.845756646  | 1.22333976   | 0.4786947  | -0.4199024 | -0.20705359  | 2.304510381  | -0.005045775 | 22.8378949  | 55.01044458 |
| Helmintex vs duplicate KK     | 1         | 4.966669158  | 0.9267815   | 0.6214142   | 4.275200664  | 0.691468495  | 0.5581501  | -1.5988469 | 2.030660572  | 5.585635014  | 0.017680034  | 50.26637626 | 104.1799437 |
| Helmintex vs RT-PCR           | 1         | 3.076539947  | 0.6276163   | 0.828896    | 0.732019432  | 2.344520515  | 0.8465765  | -0.4895478 | -0.89676142  | 3.426762536  | -4.53434E-05 | 7.960891447 | 44.24188899 |
| IgG SEA-ELISA vs CCA1         | 1         | 3.35359387   | 0.8933107   | 0.5189698   | 3.256272617  | 0.097321253  | 0.3831583  | -1.073289  | 1.775539488  | 3.773871015  | 0.012308375  | 14.70559182 | 78.41583449 |
| IgM ELISA vs triplicate KK    | 1         | 7.990514363  | 0.9243813   | 0.9163419   | 4.184079621  | 3.806434742  | 1.6592818  | -1.8109545 | 0.23253815   | 8.909854197  | 0.007319975  | 8.478645014 | 69.07985353 |
| IHA vs Urine Microscopy       | 1         | 1.884830673  | 0.6676742   | 0.6528987   | 0.990365833  | 0.89446484   | 0.4029809  | -0.4155907 | 0.050780171  | 2.111774436  | -0.001155486 | 12.00889    | 49.46432443 |
| PCR vs CCA1                   | 1         | 1.919897314  | 0.7629655   | 0.5407684   | 1.685754838  | 0.234142476  | 0.3126359  | -0.5211649 | 0.810104444  | 2.140885138  | 0.000741132  | 44.60249556 | 36.57474857 |
| rSP 13 ELISA vs 27KK          | 1         | 3.943575945  | 0.884508    | 0.6371709   | 3.152329447  | 0.791246499  | 0.5491801  | -1.1634932 | 1.327352898  | 4.413632275  | 0.003591243  | 10.03873393 | 182.1842238 |
| RT-PCR vs duplicate KK        | 1         | 6.546136636  | 0.9559431   | 0.5394982   | 6.317480556  | 0.22865608   | 0.4838526  | -2.3590984 | 3.349038793  | 7.260459093  | -0.074610713 | 24.7633092  | 73.02232543 |
| RT-PCR vs sextuple KK         | 1         | 3.785370985  | 0.8775339   | 0.6319832   | 3.023213782  | 0.762157203  | 0.5378216  | -1.1061441 | 1.271149447  | 4.231521465  | 0.007034594  | 16.9097052  | 44.68611481 |
| Sm DNA PCR vs duplicate KK    | 1         | 5.241628644  | 0.9562232   | 0.316136    | 6.351655796  | -1.110027153 | 0.2505175  | -2.0258929 | 4.147505126  | 5.733151352  | -0.072946097 | 20.59009821 | 74.15785496 |
| SmCTF-RDT vs Urine Microscopy | 1         | 0.11470094   | 0.6235238   | 0.3840932   | 0.786019136  | -0.671318196 | -0.0070731 | -0.0568871 | 0.809484363  | 0.137599874  | -0.001485713 | 8.845959917 | 68.7892742  |
| SWAP ELISA vs Sextuple KK     | 1         | 2.61203226   | 0.8299689   | 0.5505388   | 2.329658158  | 0.282374102  | 0.3763119  | -0.7580793 | 1.143434957  | 2.913645393  | -0.002148619 | 7.915396352 | 48.61764404 |
| AWE-SEA ELISA vs quadruple KK | 2         | 4.091599261  | 0.9374428   | 0.6417      | 3.422479644  | 0.669119618  | 0.4764909  | -1.3004681 | 1.343887412  | 4.201267874  | -0.110731479 | 1.388150596 | 5.477175464 |
| IHA vs triplicate KK          | 2         | -3.228545197 | 0.8147975   | 0.0715095   | 2.210904333  | -5.439449531 | -0.0987133 | 1.30342604 | 4.286906639  | -3.420883084 | 0.054610068  | 18.50366249 | 78.4576282  |
| LAMP vs triplicate KK         | 2         | 10.67157716  | 0.9428532   | 0.9823006   | 3.369503455  | 7.302073701  | 3.1600768  | -1.4745303 | -1.3799609   | 11.35540113  | 0.285471633  | 2.254182514 | 12.40880817 |
| LAMP vs Urine Microscopy      | 2         | 2.188715096  | 0.7706132   | 0.6350087   | 1.441093152  | 0.747621943  | 0.4686938  | -0.4818531 | 0.672448231  | 2.576028079  | 0.498269793  | 3.528684097 | 5.156377422 |
| CAA vs duplicate KK           | 3         | 1.626764586  | 0.6069626   | 0.6662477   | 0.636846714  | 0.989917872  | 0.3763122  | -0.3301827 | -0.185889641 | 1.688234852  | -0.001285362 | 11.61046969 | 2.583906466 |
| PCR vs KK                     | 3         | 4.257666073  | 0.9578831   | 0.4692175   | 4.428693212  | -0.171027139 | 0.2974146  | -1.5516663 | 2.222432082  | 3.987248003  | -0.206417825 | 1.104114851 | 19.56748266 |
| CAA vs Urine Microscopy       | 4         | 3.007484247  | 0.709309    | 0.7857417   | 1.115949705  | 1.891534542  | 0.7875625  | -0.5185713 | -0.107744497 | 2.973950369  | 0.361903006  | 6.27772282  | 8.59945339  |
| CCA1 vs Urine Microscopy      | 4         | 1.334801114  | 0.5142618   | 0.7412583   | 0.066047327  | 1.268753786  | 0.3630413  | -0.2166555 | -0.588875297 | 1.32609464   | 0.039484482  | 4.336732212 | 1.108586969 |
| IgG ELISA vs triplicate KK    | 4         | 3.852538933  | 0.930226    | 0.6843219   | 2.763101276  | 1.089437657  | 0.6695003  | -1.0036361 | 2.073498862  | 5.490040716  | 1.049764738  | 1.245446694 | 10.09659939 |
| SEA-ELISA vs Urine Micro.     | 4         | 3.299073392  | 0.8893851   | 0.7129045   | 2.224698876  | 1.074374517  | 0.581938   | -0.8508314 | 1.105677904  | 3.856205423  | 0.575019333  | 1.805449225 | 1.39023474  |
| SmCTF-RDT vs quadruple KK     | 4         | 1.779560015  | 0.8560304   | 0.3548606   | 2.419805098  | -0.640245083 | 0.1084787  | -0.6643744 | 1.316609766  | 0.426412266  | -0.963480779 | 0.967801763 | 6.199561722 |
| Leukocyturia vs Urine         | 5         | 0.692161985  | 0.5569908   | 0.5995012   | 0.240191846  | 0.451970139  | 0.1769323  | -0.1236698 | -0.005458151 | 0.665003379  | 0.614551157  | 1.318909875 | 0.949381175 |
| CCA1 cassette vs sextuple KK  | 7         | 2.431379665  | 0.8348166   | 0.6786077   | 1.669654331  | 0.761725334  | 0.4216463  | -0.6342885 | 0.28745217   | 2.373255986  | -0.293777726 | 0.414154448 | 0.760280051 |
| CCA1 cassette vs quadruple KK | 11        | 2.299895257  | 0.870482    | 0.5863121   | 1.944011816  | 0.35588344   | 0.328874   | -0.6699578 | 0.803674578  | 2.330029656  | -0.003548522 | 0.582753863 | 0.813372952 |
| CCA1 cassette vs duplicate KK | 17        | 2.199690706  | 0.8547191   | 0.590921    | 1.824340057  | 0.375350649  | 0.3256972  | -0.6296163 | 0.597533855  | 2.055340811  | -0.249527461 | 0.896271582 | 2.0372956   |
| Proteinuria vs Urine          | 41        | 1.92224248   | 0.5865564   | 0.8256068   | 0.352611315  | 1.569631165  | 0.5322758  | -0.3025435 | -0.535764931 | 1.837329787  | 0.157712356  | 1.078063695 | 1.708611274 |
| Haematuria vs Urine           | 72        | 2.957768287  | 0.7437497   | 0.86777     | 1.069391788  | 1.888376499  | 0.7529811  | -0.5315613 | -0.333182353 | 2.924218646  | 0.104913408  | 0.717026672 | 1.757249332 |
| Grouped test comparisons      |           |              |             |             |              |              |            |            |              |              |              |             |             |
| CCA2 cassette vs KK (all)     | 2         | 3.058332939  | 0.5175037   | 0.8759044   | 0.098805607  | 2.959527332  | 0.9514956  | -0.3767216 | -1.60215144  | 3.43571232   | -0.004905905 | 8.222717338 | 72.97423906 |
| FLOTAC (all) vs triplicate KK | 3         | 2.807043743  | 0.7936918   | 0.647058    | 1.948108598  | 0.858935145  | 0.5041381  | -0.7149455 | 0.610232926  | 3.131237233  | 0.010433914  | 13.39812001 | 47.28436633 |
| CAA vs KK (all)               | 4         | 2.218558705  | 0.7265028   | 0.6807271   | 1.287010346  | 0.931548359  | 0.4243936  | -0.5391142 | 0.055141348  | 2.230624646  | -0.212391379 | 5.109337752 | 2.127542323 |
| CCA1 vs KK (all)              | 37        | 2.353420113  | 0.8721674   | 0.6013747   | 1.938457628  | 0.414962485  | 0.342787   | -0.6792903 | 0.707545633  | 2.291879766  | -0.099422966 | 0.63936168  | 1.240019211 |

*Table 5 - Sensitivities and specificities from the bayesian bivariate random effects model for each diagnostic test*

| Tests                         | Number of studies | Sensitivity |             |              | Specificity |             |              |
|-------------------------------|-------------------|-------------|-------------|--------------|-------------|-------------|--------------|
|                               |                   | Se          | LL 2.5% eCI | UL 97.5% eCI | Sp          | LL 2.5% eCI | UL 97.5% eCI |
| Anti IgG RDT-Sh vs Urine      | 1                 | 0.4750171   | 0.0049109   | 0.993815455  | 0.1924764   | 0.001032063 | 0.972541853  |
| CAA vs quadruple KK           | 1                 | 0.8886117   | 0.0734737   | 0.999774085  | 0.6082348   | 0.010394884 | 0.996604095  |
| CCA1 cassette vs 16KK         | 1                 | 0.7243738   | 0.0159298   | 0.998315315  | 0.6486684   | 0.011873868 | 0.997336831  |
| CCA1 cassette vs Helmintex    | 1                 | 0.5432535   | 0.0060719   | 0.995681455  | 0.6527018   | 0.01029001  | 0.997782925  |
| CCA1 cassette vs RT-PCR       | 1                 | 0.6010372   | 0.0089075   | 0.996671064  | 0.6588832   | 0.010627548 | 0.99735831   |
| CCA1 cassette vs single KK    | 1                 | 0.7562486   | 0.0200934   | 0.998821622  | 0.6151916   | 0.010061895 | 0.997084593  |
| CCA2 cassette vs double KK    | 1                 | 0.5911522   | 0.0071908   | 0.99698671   | 0.8780587   | 0.051948794 | 0.99948796   |
| CCA2 cassette vs quadruple KK | 1                 | 0.4659715   | 0.004732    | 0.993631655  | 0.8804041   | 0.07237841  | 0.999506175  |
| Colorimetric vs Urine         | 1                 | 0.5160936   | 0.0059616   | 0.994874188  | 0.6732351   | 0.012315758 | 0.99771679   |
| COPT vs double KK             | 1                 | 0.7350894   | 0.0183996   | 0.999168593  | 0.8799962   | 0.071662891 | 0.999419096  |
| DDIA vs Urine Microscopy      | 1                 | 0.5646498   | 0.0062138   | 0.996332453  | 0.5801309   | 0.007168676 | 0.997244909  |
| FLOTAC (10 days) vs tripl. KK | 1                 | 0.8833156   | 0.0678575   | 0.999504214  | 0.6429088   | 0.012737015 | 0.997002063  |
| FLOTAC (30 days) vs tripl. KK | 1                 | 0.9340129   | 0.1654421   | 0.999859688  | 0.6085309   | 0.011458981 | 0.996324903  |
| FLOTAC (fresh) vs tripl. KK   | 1                 | 0.645669    | 0.0104418   | 0.997094993  | 0.7001996   | 0.015566698 | 0.998048114  |
| Helmintex vs duplicate KK     | 1                 | 0.9267815   | 0.1566279   | 0.999850753  | 0.6214142   | 0.010191859 | 0.996552959  |
| Helmintex vs RT-PCR           | 1                 | 0.6276163   | 0.0096701   | 0.996927567  | 0.828896    | 0.031694518 | 0.999196901  |
| IgG SEA-ELISA vs CCA1         | 1                 | 0.8933107   | 0.0707431   | 0.999561351  | 0.5189698   | 0.005307201 | 0.994896931  |
| IgM ELISA vs triplicate KK    | 1                 | 0.9243813   | 0.1467481   | 0.999836095  | 0.9163419   | 0.125765352 | 0.999715443  |
| IHA vs Urine Microscopy       | 1                 | 0.6676742   | 0.0116374   | 0.997553444  | 0.6528987   | 0.011296826 | 0.997251355  |
| PCR vs CCA1                   | 1                 | 0.7629655   | 0.022043    | 0.998669822  | 0.5407684   | 0.006448133 | 0.995846675  |
| rSP13 ELISA vs 27KK           | 1                 | 0.884508    | 0.0650399   | 0.999537488  | 0.6371709   | 0.010320459 | 0.99722862   |
| RT-PCR vs duplicate KK        | 1                 | 0.9559431   | 0.235933    | 0.999946861  | 0.5394982   | 0.003054185 | 0.997756114  |
| RT-PCR vs sextuple KK         | 1                 | 0.8775339   | 0.0637974   | 0.999513105  | 0.6319832   | 0.010406706 | 0.996953866  |
| Sm DNA PCR vs duplicate KK    | 1                 | 0.9562232   | 0.2298923   | 0.999947103  | 0.316136    | 0.001208631 | 0.996315402  |
| SmCTF-RDT vs Urine Microscopy | 1                 | 0.6235238   | 0.0092144   | 0.997516474  | 0.3840932   | 0.003031678 | 0.990146401  |
| SWAP ELISA vs Sextuple KK     | 1                 | 0.8299689   | 0.0353961   | 0.99911491   | 0.5505388   | 0.006669649 | 0.995520526  |
| AWE-SEA ELISA vs quadruple KK | 2                 | 0.9374428   | 0.663782    | 0.998324929  | 0.6417      | 0.185606389 | 0.943594863  |
| IHA vs triplicate KK          | 2                 | 0.8147975   | 0.0194877   | 0.999352904  | 0.0715095   | 5.5441E-05  | 0.865398383  |
| LAMP vs triplicate KK         | 2                 | 0.9428532   | 0.7019744   | 0.997337756  | 0.9823006   | 0.879388278 | 0.999949756  |
| LAMP vs Urine Microscopy      | 2                 | 0.7706132   | 0.2678742   | 0.979544766  | 0.6350087   | 0.040074085 | 0.989892082  |
| CAA vs duplicate KK           | 3                 | 0.6069626   | 0.024503    | 0.994050292  | 0.6662477   | 0.029325523 | 0.995140491  |
| PCR vs KK                     | 3                 | 0.9578831   | 0.6327875   | 0.999806283  | 0.4692175   | 0.047322874 | 0.918938689  |
| CAA vs Urine Microscopy       | 4                 | 0.709309    | 0.1968127   | 0.97561546   | 0.7857417   | 0.142936487 | 0.997654471  |
| CCA1 vs Urine Microscopy      | 4                 | 0.5142618   | 0.1094359   | 0.900281862  | 0.7412583   | 0.279021452 | 0.973293967  |
| IgG ELISA vs triplicate KK    | 4                 | 0.930226    | 0.8204302   | 0.98412027   | 0.6843219   | 0.076773596 | 0.990898564  |
| SEA-ELISA vs Urine Micro.     | 4                 | 0.8893851   | 0.7365351   | 0.971267703  | 0.7129045   | 0.272602542 | 0.959936037  |
| SmCTF-RDT vs quadruple KK     | 4                 | 0.8560304   | 0.3004736   | 0.998556357  | 0.3548606   | 0.140483256 | 0.630656592  |
| Leukocyturia vs Urine         | 5                 | 0.5569908   | 0.3447937   | 0.7618991    | 0.5995012   | 0.245456227 | 0.883532101  |
| CCA1 cassette vs sextuple KK  | 7                 | 0.8348166   | 0.7073517   | 0.920219224  | 0.6786077   | 0.548966403 | 0.793295985  |
| CCA1 cassette vs quadruple KK | 11                | 0.870482    | 0.7855841   | 0.930458304  | 0.5863121   | 0.446411666 | 0.717986875  |
| CCA1 cassette vs duplicate KK | 17                | 0.8547191   | 0.7430488   | 0.931016547  | 0.590921    | 0.447902542 | 0.721719083  |
| Proteinuria vs Urine          | 41                | 0.5865564   | 0.4968416   | 0.670114249  | 0.8256068   | 0.759632106 | 0.880166945  |
| Haematuria vs Urine           | 72                | 0.7437497   | 0.6953608   | 0.788788909  | 0.86777     | 0.834639646 | 0.896729776  |
| Grouped test comparisons      |                   |             |             |              |             |             |              |
| CCA2 cassette vs KK (all)     | 2                 | 0.5175037   | 0.0051457   | 0.995304665  | 0.8759044   | 0.049243157 | 0.999494388  |
| FLOTAC (all) vs triplicate KK | 3                 | 0.7936918   | 0.0271207   | 0.998856805  | 0.647058    | 0.009599002 | 0.997441116  |
| CAA vs KK (all)               | 4                 | 0.7265028   | 0.1403461   | 0.98879899   | 0.6807271   | 0.175192484 | 0.969812396  |
| CCA1 vs KK (all)              | 37                | 0.8721674   | 0.8186703   | 0.915510917  | 0.6013747   | 0.508044351 | 0.689495314  |

*Table 6 – Number of studies and number of participants for each test comparison*

| Test                                         | Studies | Participants |
|----------------------------------------------|---------|--------------|
| 1 CCA1 cassette vs single KK                 | 1       | 217          |
| 2 CCA1 cassette vs duplicate KK              | 14      | 4884         |
| 3 CCA1 cassette vs quadruple KK              | 10      | 4592         |
| 4 CCA1 cassette vs sextuple KK               | 7       | 2325         |
| 5 CCA1 cassette vs 16KK                      | 1       | 217          |
| 6 CCA2 cassette vs double KK                 | 1       | 100          |
| 7 CCA2 cassette vs quadruple KK              | 1       | 100          |
| 8 CAA vs duplicate KK                        | 2       | 830          |
| 9 CAA vs quadruple KK                        | 1       | 377          |
| 10 FLOTAC (fresh) vs triplicate KK           | 1       | 112          |
| 11 FLOTAC (10 days) vs triplicate KK         | 1       | 112          |
| 12 FLOTAC (30 days) vs triplicate KK         | 1       | 112          |
| 13 SmCTF-RDT vs quadruple KK                 | 3       | 291          |
| 14 SmCTF-RDT vs Urine Microscopy             | 1       | 117          |
| 15 Sm DNA PCR vs duplicate KK                | 1       | 89           |
| 16 SWAP ELISA vs Sextuple KK                 | 1       | 482          |
| 17 IgM ELISA vs triplicate KK                | 1       | 137          |
| 18 IgG ELISA vs triplicate KK                | 4       | 954          |
| 19 rSP13 ELISA vs 27KK                       | 1       | 1371         |
| 20 AWE-SEA ELISA vs quadruple KK             | 2       | 484          |
| 21 IgG SEA-ELISA vs CCA1                     | 1       | 258          |
| 22 IgG SEA-ELISA vs Urine Microscopy         | 4       | 503          |
| 23 Anti IGg RDT-Sh vs Urine Microscopy       | 1       | 160          |
| 24 Haematuria (R strip) vs Urine Microscopy  | 71      | 156279       |
| 25 Proteinuria (R strip) vs Urine Microscopy | 40      | 79466        |
| 26 Leukocyturia vs Urine Microscopy          | 5       | 1532         |
| 27 LAMP vs triplicate KK                     | 2       | 493          |
| 28 LAMP vs Urine Microscopy                  | 2       | 266          |
| 29 IHA vs triplicate KK                      | 1       | 203          |
| 30 IHA vs Urine Microscopy                   | 1       | 146          |
| 31 Colorimetric test vs Urine Microscopy     | 1       | 1279         |
| 32 COPT vs double KK                         | 1       | 572          |
| 33 PCR vs KK                                 | 2       | 551          |
| 34 PCR vs CCA1                               | 1       | 258          |

|                              |    |       |
|------------------------------|----|-------|
| 35 Helmintex vs duplicate KK | 1  | 461   |
| 36 Helmintex vs RT-PCR       | 1  | 176   |
| 37 DDIA vs Urine Microscopy  | 1  | 146   |
| 38 CCA1 vs Urine Microscopy  | 4  | 991   |
| 39 CCA1 vs Helmintex         | 1  | 214   |
| 40 CCA1 vs RT-PCR            | 1  | 196   |
| 41 CAA vs Urine Microscopy   | 4  | 1247  |
| 42 RT-PCR vs sextuple KK     | 1  | 198   |
| 43 RT-PCR vs duplicate KK    | 1  | 206   |
| 44 CCA1 vs KK                | 25 | 12235 |
| 45 CCA2 vs KK                | 1  | 200   |
| 46 CAA vs KK                 | 3  | 1207  |
| 47 FLOTAC vs KK              | 1  | 336   |
